# Supplementary material for: A metatranscriptomic exploration of fungal and bacterial contributions to allochthonous leaf litter decomposition in the streambed
Source: PeerJ. 2025 Apr 25;13:e19120. doi: 10.7717/peerj.19120 (PMC12036579; doi:10.7717/peerj.19120)
Supplement: Supplemental Information 2 — Summary statistics of preprocessed sequencing reads, assembled contigs, and functional annotations (NCBI, JGI, KEGG Orthologs) for control and treatment samples. [file peerj-13-19120-s002.xlsx]

## Sheet: Sheet1
samples	reads	contigs	NCBI (contigs)	JGI (contigs)	num_reads_KO_bacteria	num_reads_KO_fungi
AFP2_C1_E_R_D01	85739737	1968933	1299532	456982	14341307	5375002
AFP2_C1_E_R_D02	105409149	2471719	1626798	570156	21523420	8015173
AFP2_C1_E_R_D03	95012565	69794	69669	13756	15833032	5847385
AFP2_C1_E_R_D04	122880197	628791	627363	135367	1277046	928024
AFP2_C1_E_R_D05	67436215	1030491	629459	228328	6459356	2430466
AFP2_C1_E_R_D06	77232735	1542616	1538665	354872	4531272	68476391
AFP2_C1_E_R_D07	129064120	2260503	1483578	516588	20750153	7928525
AFP2_C1_E_R_D08	119189296	1974135	1273038	445071	15206738	5831992
AFP2_C1_E_R_D09	123217843	2175343	1404264	493019	23588967	8463355
AFP2_C1_E_R_D10	133961391	2159706	1399972	502363	27981178	9796338
AFP2_C2_E_R_D01	111762396	2358170	1568804	547696	20592258	7862023
AFP2_C2_E_R_D02	103330245	1986008	1319131	480023	18974850	7037566
AFP2_C2_E_R_D03	125699339	2053598	1307601	472699	17657738	6640026
AFP2_C2_E_R_D04	61604171	816804	814862	175941	1860380	1337384
AFP2_C2_E_R_D05	112756862	2097923	1356418	466821	15553336	5941692
AFP2_C2_E_R_D06	95836617	1587149	1009218	357303	11497678	4386093
AFP2_C2_E_R_D07	120144769	1866582	1861232	423128	6050986	88775616
AFP2_C2_E_R_D08	108279932	1741143	1735678	389771	5661782	4238084
AFP2_C2_E_R_D09	99468939	1573355	1568855	357025	4968193	3675471
AFP2_C2_E_R_D10	129098556	2188920	1449525	510752	25024396	9380881
AFP2_C3_E_R_D01	121361978	2607376	1694939	600704	27385924	9529773
AFP2_C3_E_R_D02	62617499	1151616	1148740	256119	2864909	2113068
AFP2_C3_E_R_D03	58079237	960636	958279	209746	2287430	1664406
AFP2_C3_E_R_D04	131222218	1637968	1015341	363574	13753287	5608999
AFP2_C3_E_R_D05	116309554	2042153	1303347	461688	17582438	6484728
AFP2_C3_E_R_D06	120119580	1973929	1262681	441480	16491392	6183725
AFP2_C3_E_R_D07	99377043	1622870	1021566	362954	13066261	4900612
AFP2_C3_E_R_D08	99119936	1776285	1134972	396753	14869186	5503701
AFP2_C3_E_R_D09	107444423	1866726	1197103	425895	18017683	6731276
AFP2_C3_E_R_D10	97730598	87077	86935	15061	11622872	4278284
AFP2_O1_E_R_D01	79961246	1491400	1486858	342829	3390125	54330052
AFP2_O1_E_R_D02	153868504	2955580	1823814	660813	29142175	9565245
AFP2_O1_E_R_D03	89559578	1393644	823287	301994	8254080	2977315
AFP2_O1_E_R_D04	129813513	2493091	1609374	560100	20159679	7756159
AFP2_O1_E_R_D05	194965307	3379421	3369532	760801	10668304	159334928
AFP2_O1_E_R_D06	92441794	1427993	888099	308104	10348050	3950662
AFP2_O1_E_R_D07	91397892	1658919	1045434	369051	11275712	4462094
AFP2_O1_E_R_D08	96109114	1664950	1079902	389635	14999583	5778597
AFP2_O1_E_R_D09	101597398	1528514	939206	327124	11076809	4260504
AFP2_O1_E_R_D10	103704736	1646877	1025210	375056	17402614	6042299
AFP2_O2_E_R_D01	187333693	2672996	1643562	588742	27286357	9160682
AFP2_O2_E_R_D02	113335980	2070309	1375024	476139	18431559	6976863
AFP2_O2_E_R_D03	57840243	963237	584565	201473	5390071	2003638
AFP2_O2_E_R_D04	144887640	2591229	1617218	552658	20119804	7408903
AFP2_O2_E_R_D05	147652871	3099322	2003855	684323	26726255	10161783
AFP2_O2_E_R_D06	175253309	2887802	2880240	634651	166373025	141693245
AFP2_O2_E_R_D07	91123085	1884168	1195440	412655	14613091	5347929
AFP2_O2_E_R_D08	87808059	1579587	1004717	353458	12265272	4597610
AFP2_O2_E_R_D09	146604251	1894319	1165809	395703	15063223	5228341
AFP2_O2_E_R_D10	105617759	1692787	1064511	367956	13364489	4809384
AFP2_O3_E_R_D01	131384695	2745662	1705460	577782	18629193	6697892
AFP2_O3_E_R_D02	108689932	2267913	1455075	517013	16846483	6414801
AFP2_O3_E_R_D03	125962858	1942607	1169891	390614	11944609	4402154
AFP2_O3_E_R_D04	80036341	91622	91432	14061	7024682	2614861
AFP2_O3_E_R_D05	103259626	1724924	1060047	359141	14327651	4784639
AFP2_O3_E_R_D06	92956603	1721911	1055480	362285	11721291	4351726
AFP2_O3_E_R_D07	116331347	1694147	979525	322814	10045605	3667553
AFP2_O3_E_R_D08	95829671	1434478	1431041	304616	6180407	4927701
AFP2_O3_E_R_D09	111097813	1333307	1329789	254067	4626959	3604724
AFP2_O3_E_R_D10	133567854	1328377	1322381	284187	7157850	5677311
