# Supplementary material for: A metatranscriptomic exploration of fungal and bacterial contributions to allochthonous leaf litter decomposition in the streambed
Source: PeerJ. 2025 Apr 25;13:e19120. doi: 10.7717/peerj.19120 (PMC12036579; doi:10.7717/peerj.19120)
Supplement: Supplemental Information 3 — Differential analysis of bacterial and fungal significant KOs (control vs treatment). significance was implied if the log fold change is a minimum of 2 and the p-adjusted value is maximum of 0.05. [file peerj-13-19120-s003.xlsx]

## Sheet: bacteria
Bacteria		control vs treatment
Kos	baseMean	log2FoldChange	lfcSE	stat	pvalue	padj
K00113	1405.98	2.12764	0.629233	3.38132	0.000721394	0.0361753
K00693	398.331	2.9782	0.88513	3.3647	0.000766274	0.037665
K00696	221.41	-3.06105	0.877131	-3.48985	0.000483299	0.0281056
K00815	214.551	5.25752	1.11042	4.73472	2.19357e-06	0.00123276
K00863	154.919	6.009	1.36515	4.40172	1.07394e-05	0.00280768
K00894	30.0467	3.53871	0.993347	3.56241	0.000367461	0.025337
K00921	42.3754	5.24155	1.36574	3.83789	0.000124097	0.0141628
K00968	60.0096	4.57707	1.37483	3.32919	0.000870991	0.0402236
K00972	44.8877	4.54078	1.15431	3.93377	8.36245e-05	0.0109251
K01194	159.032	3.2311	0.995762	3.24485	0.00117512	0.0482139
K01201	80.5289	3.10679	0.853853	3.63856	0.000274168	0.02215
K01218	74.2662	2.34401	0.709076	3.30573	0.000947289	0.0420514
K01230	84.7894	5.80874	0.982251	5.9137	3.34508e-09	1.66066e-05
K01315	80.8233	7.0133	1.53535	4.56788	4.92682e-06	0.00196866
K01373	324.98	2.81754	0.841753	3.34723	0.000816246	0.038964
K01530	65.4784	3.27999	0.903112	3.63188	0.000281368	0.0223496
K01608	2211.73	4.12706	0.835786	4.93794	7.89534e-07	0.00112718
K01787	132.389	-4.54681	1.29494	-3.51122	0.000446052	0.0277891
K01796	292.645	2.21395	0.559763	3.95516	7.64827e-05	0.0106957
K01816	568.83	2.2226	0.647777	3.43112	0.000601085	0.0327165
K01930	53.3052	3.14655	0.880596	3.5732	0.000352643	0.024982
K02049	52.5256	3.25878	0.948814	3.43458	0.000593468	0.0325555
K02216	59.3004	3.79723	1.16683	3.25431	0.00113668	0.0474206
K02540	44.9424	4.10997	1.19205	3.44781	0.000565149	0.0317026
K02695	4.08101	-6.92135	1.4783	-4.68198	2.84121e-06	0.00141052
K02943	62.2048	3.70934	0.898443	4.12863	3.64933e-05	0.00696812
K03083	1311.33	4.76052	1.35024	3.52569	0.000422381	0.0270569
K03094	516.535	3.52914	1.08277	3.25936	0.00111664	0.046781
K03135	2.85275	13.8203	4.17307	3.31178	0.000927047	0.0418393
K03240	12.296	4.70057	1.30761	3.5948	0.000324646	0.0244455
K03331	36.0857	2.86388	0.804907	3.55803	0.00037365	0.025586
K03363	151.01	3.62352	0.97683	3.70947	0.000207692	0.0190942
K03648	181.317	2.66936	0.598173	4.46252	8.09997e-06	0.00236543
K03742	1443.47	4.52734	0.906105	4.99648	5.8386e-07	0.00112718
K03898	19.8583	28.0438	6.31797	4.43874	9.0487e-06	0.00256699
K04194	17.1301	27.9609	6.31798	4.42561	9.61704e-06	0.00265243
K04347	38.8036	28.4892	6.31796	4.50924	6.5059e-06	0.00201866
K04348	916.715	4.20743	1.21584	3.46051	0.000539154	0.0305901
K04366	10.5996	-16.3027	4.44174	-3.67033	0.000242235	0.0209143
K04373	141.462	3.44664	0.938126	3.67397	0.000238814	0.0207998
K04406	6.51051	6.0563	1.87186	3.23544	0.00121454	0.0490011
K04412	32.6288	5.48165	1.51973	3.607	0.000309762	0.0241649
K04437	1115.18	3.28744	0.959188	3.42731	0.000609584	0.0327165
K04461	29.441	5.91781	1.82574	3.24132	0.00118978	0.0484154
K04482	53.3714	3.44767	0.94312	3.6556	0.000256582	0.0217744
K04539	146.787	5.56302	1.66034	3.35054	0.000806545	0.0388747
K04541	39.1297	28.5253	6.31796	4.51495	6.33305e-06	0.00201866
K04656	163.202	-2.48335	0.597582	-4.15566	3.24345e-05	0.00644083
K04712	88.7108	3.14208	0.940636	3.34038	0.000836641	0.0397465
K04965	3.34776	24.0691	6.31811	3.80955	0.000139221	0.0151386
K04984	28.7856	3.83014	1.09701	3.49143	0.000480451	0.0281056
K05597	172.429	3.02367	0.902403	3.35069	0.000806116	0.0388747
K05698	9.74251	5.42089	1.67601	3.2344	0.00121898	0.0490011
K05725	115.795	12.1865	3.20311	3.80459	0.000142038	0.0151645
K05749	84.6458	3.97464	1.06824	3.72073	0.000198644	0.0184331
K05758	334.35	3.99817	1.21612	3.28763	0.00101034	0.0430479
K05759	418.171	2.99543	0.917703	3.26406	0.00109829	0.0462073
K05760	254.472	4.3696	1.23665	3.53343	0.000410206	0.0269799
K05773	8.42077	-2.36699	0.663048	-3.56986	0.000357171	0.024982
K05850	801.392	3.54043	1.00526	3.52192	0.000428439	0.027269
K05929	9.4993	3.73198	1.03806	3.59516	0.00032419	0.0244455
K06065	20.4054	29.1356	6.2911	4.63124	3.63486e-06	0.00164048
K06128	26.8598	4.44236	1.17734	3.77321	0.00016116	0.0158684
K06210	14.4739	5.62144	1.54497	3.63855	0.000274173	0.02215
K06270	96.6939	5.21207	1.47737	3.52793	0.000418821	0.0270569
K06271	343.731	3.68437	1.05054	3.50712	0.000452981	0.0277891
K06279	43.1174	30	6.10929	4.91055	9.08191e-07	0.00112718
K06578	7.26784	30	6.31342	4.75178	2.01629e-06	0.00123276
K06631	69.8786	4.40938	1.14095	3.86464	0.000111252	0.0131503
K06704	38.0592	4.93063	1.37171	3.59452	0.000324987	0.0244455
K07151	220.771	3.61673	1.03455	3.49595	0.000472373	0.0281056
K07200	1074.72	4.18767	1.07246	3.90475	9.43221e-05	0.0120067
K07322	3510.61	-2.68519	0.825862	-3.25138	0.00114845	0.0477113
K07404	102.388	2.99565	0.704346	4.25309	2.10841e-05	0.00467287
K07820	1.54345	23.0413	6.3183	3.64676	0.000265571	0.0219738
K07839	4.46638	24.5791	6.31777	3.89048	0.000100047	0.0125743
K07901	202.027	3.22975	0.956722	3.37585	0.000735879	0.0367163
K08056	130.523	4.52608	1.33599	3.38781	0.000704527	0.035873
K08161	16.9522	-2.84424	0.852465	-3.33649	0.000848448	0.0399549
K08269	270.768	3.60748	0.979835	3.68172	0.000231663	0.0205374
K08279	113.714	-4.14349	0.941852	-4.3993	1.08601e-05	0.00280768
K08304	36.8144	2.99079	0.882008	3.39089	0.000696648	0.035873
K08362	1.56519	23.5899	6.31829	3.73359	0.000188768	0.0180219
K08510	3.2282	24.9309	6.31811	3.94594	7.9489e-05	0.0108116
K08582	8.93126	4.1964	1.25335	3.34814	0.000813551	0.038964
K08655	13.1927	2.93704	0.822642	3.57025	0.000356638	0.024982
K08710	23.1655	3.85113	1.1626	3.3125	0.000924648	0.0418393
K08745	103.598	3.42749	0.930258	3.68445	0.000229198	0.0205018
K08800	13.9432	3.35739	0.988752	3.39558	0.000684829	0.0357877
K08803	54.0979	4.95358	1.36272	3.63506	0.000277914	0.0222533
K08805	21.9181	4.9437	1.30533	3.78732	0.00015228	0.0154285
K08825	11.6828	3.82265	1.10928	3.44606	0.000568831	0.0317299
K08837	13.9566	5.50949	1.13959	4.83461	1.3341e-06	0.00123276
K08860	239.676	4.81954	1.06563	4.52271	6.10523e-06	0.00201866
K08861	11.9062	9.15064	2.79314	3.27611	0.00105248	0.0444685
K08900	388.941	5.85389	1.59767	3.66401	0.000248298	0.021253
K08908	18.0269	-4.78762	1.36585	-3.50524	0.000456202	0.0277891
K08911	28.3512	-3.92771	1.12302	-3.49745	0.000469733	0.0281056
K09052	2.73972	23.4551	6.29526	3.72584	0.000194669	0.0182346
K09228	24.1282	4.20663	1.22271	3.44041	0.000580841	0.0320399
K09250	20.4916	2.78246	0.841948	3.30479	0.000950492	0.0420514
K09427	1.40215	22.4459	6.31833	3.5525	0.000381589	0.0259507
K09565	485.363	3.84555	0.995055	3.86466	0.000111244	0.0131503
K09663	14.4888	25.842	6.31798	4.09023	4.30943e-05	0.00764078
K09935	251.631	-4.06142	1.16437	-3.48808	0.000486502	0.0281056
K10100	3.71732	25.3218	6.31809	4.00783	6.12803e-05	0.00965796
K10398	10.4716	3.89687	1.08196	3.60167	0.000316184	0.0243364
K10405	17.4438	4.98804	1.29495	3.85192	0.000117197	0.0135308
K10413	321.473	3.27854	1.01137	3.24169	0.00118821	0.0484154
K10425	8.26071	25.2179	6.31801	3.99143	6.56757e-05	0.00973275
K10453	4.26078	25.7884	6.31807	4.0817	4.47084e-05	0.00773754
K10475	3.17937	-22.4791	5.62901	-3.99343	6.51233e-05	0.00973275
K10556	131.651	3.89334	0.81956	4.75053	2.02887e-06	0.00123276
K10572	7.58951	28.3061	6.231	4.54278	5.55182e-06	0.00196871
K10580	61.2437	3.0926	0.938242	3.29617	0.000980126	0.0425121
K10626	16.4578	4.35752	1.14209	3.8154	0.000135964	0.0149998
K10639	1.67388	23.4078	6.31827	3.70478	0.000211577	0.0192729
K10776	1.49348	5.66506	1.60606	3.52731	0.000419806	0.0270569
K10900	14.0171	2.61341	0.785969	3.32509	0.000883911	0.0406312
K10956	410.136	3.34419	0.931289	3.59092	0.000329513	0.0245995
K10990	2.95933	30	6.08784	4.92786	8.31359e-07	0.00112718
K10994	2.20514	26.3322	6.12881	4.29647	1.73543e-05	0.00410265
K11256	3.79241	26.8013	6.18183	4.33549	1.45434e-05	0.00352198
K11290	46.9582	4.39543	1.30809	3.3602	0.000778859	0.0380951
K11363	13.6624	16.1129	3.71202	4.34073	1.42007e-05	0.00352198
K11837	11.7186	5.82919	1.63293	3.56978	0.000357281	0.024982
K11839	12.9722	7.38905	2.17571	3.39615	0.000683397	0.0357877
K11973	17.6834	29.9996	6.30123	4.76092	1.92712e-06	0.00123276
K12013	1.74997	22.6316	6.31826	3.58194	0.00034105	0.0246851
K12196	136.912	3.30501	0.922195	3.58385	0.000338562	0.0246851
K12306	7.31001	7.96712	2.41043	3.30526	0.000948872	0.0420514
K12309	204.365	6.01993	1.19517	5.03687	4.7321e-07	0.00112718
K12373	352.209	2.6638	0.696474	3.82469	0.000130935	0.0147549
K12396	13.9925	4.20539	1.11019	3.78798	0.000151876	0.0154285
K12496	1.3478	22.5176	6.31835	3.56384	0.000365464	0.025337
K12537	187.554	-2.05716	0.514824	-3.99585	6.44637e-05	0.00973275
K12555	127.93	2.57519	0.667851	3.85594	0.000115286	0.0134667
K12614	192.699	3.99986	0.98056	4.07916	4.51987e-05	0.00773754
K13117	9.75579	4.73814	1.42186	3.33235	0.000861164	0.040129
K13129	1.35867	22.325	6.31835	3.53336	0.000410309	0.0269799
K13130	7.78245	25.0947	6.31801	3.97193	7.12919e-05	0.0102588
K13170	4.55426	26.0196	6.31806	4.11828	3.81704e-05	0.00715083
K13177	13.1648	3.17902	0.909526	3.49525	0.000473623	0.0281056
K13178	42.9915	4.22932	1.12332	3.76503	0.000166529	0.0162105
K13612	74.4734	3.11117	0.90397	3.44167	0.000578127	0.0320399
K13811	225.336	3.05251	0.723869	4.21694	2.47634e-05	0.0052636
K13866	12.1299	4.81867	1.15061	4.18793	2.81515e-05	0.00582326
K13887	26.5013	4.29337	0.943506	4.55044	5.35339e-06	0.00196866
K14007	63.2623	3.83894	1.09396	3.50921	0.000449436	0.0277891
K14163	206.576	3.74897	1.1298	3.31827	0.000905777	0.0414445
K14169	2.90085	17.6182	4.53339	3.88633	0.000101773	0.0126313
K14206	27.049	3.01192	0.788003	3.82222	0.000132257	0.0147549
K14343	2.54761	-10.9347	2.8206	-3.87673	0.000105872	0.0128195
K14388	9.52506	4.28979	1.04449	4.10707	4.00716e-05	0.00723402
K14445	43.5855	2.45635	0.744487	3.29939	0.000968959	0.0423824
K14556	11.3639	3.97504	1.16292	3.41816	0.000630457	0.0334749
K14572	88.4367	3.21498	0.977326	3.28957	0.0010034	0.0430479
K14677	27.6968	4.54332	1.25696	3.61452	0.000300909	0.0237121
K14688	13.8786	3.2197	0.899262	3.58038	0.000343091	0.0246851
K14692	14.0117	3.2043	0.968082	3.30995	0.000933125	0.0419231
K14704	25.7188	4.50937	1.06051	4.25209	2.11783e-05	0.00467287
K14780	10.8234	4.53397	1.34614	3.36814	0.000756783	0.0375705
K14947	12.6678	4.75537	1.22612	3.87839	0.000105152	0.0128195
K14961	6.44801	3.65275	1.11145	3.28647	0.00101452	0.0430479
K14972	10.7391	26.2905	6.30211	4.1717	3.02339e-05	0.00612637
K15113	9.05048	5.21201	1.47608	3.53097	0.000414041	0.0270461
K15125	5.26084	-4.3465	1.31869	-3.29607	0.000980488	0.0425121
K15175	6.22292	6.33636	1.85231	3.42078	0.000624415	0.0333323
K15348	7.17377	24.936	6.31802	3.94681	7.92e-05	0.0108116
K15779	126.811	3.27064	0.994503	3.28872	0.00100643	0.0430479
K16196	78.0388	3.15221	0.945201	3.33497	0.000853101	0.0399549
K16273	2.9337	25.1842	6.29593	4.00007	6.33233e-05	0.00973275
K16343	212.71	8.77325	1.9527	4.49288	7.02675e-06	0.0021142
K16452	4.48904	25.571	6.31807	4.04728	5.18157e-05	0.00871997
K16529	9.19871	29.8362	6.30661	4.73094	2.23483e-06	0.00123276
K16739	1.79513	29.2863	6.31826	4.63519	3.56614e-06	0.00164048
K16773	4.13035	25.977	6.31808	4.11153	3.93045e-05	0.00722693
K16810	1.61882	25.445	6.30615	4.03495	5.4613e-05	0.00882177
K17043	10.6323	4.03787	1.17779	3.42833	0.0006073	0.0327165
K17260	304.484	3.1991	0.909395	3.51783	0.000435088	0.0273691
K17414	1.59779	23.8377	6.31829	3.77281	0.000161416	0.0158684
K17418	2.54055	26.9309	5.91231	4.55506	5.2371e-06	0.00196866
K17454	78.2811	29.5975	6.31795	4.68467	2.8041e-06	0.00141052
K17503	2.68638	30	3.98556	7.52718	5.18492e-14	5.14811e-10
K17508	17.3647	3.19224	0.940988	3.39244	0.000692737	0.035873
K17576	2.58691	23.0604	6.31816	3.64986	0.000262382	0.0218924
K17583	4.95676	15.4598	3.37226	4.58439	4.55315e-06	0.00196558
K17906	196.697	6.10405	1.88437	3.23931	0.0011982	0.0485589
K18059	514.718	-4.23487	1.15108	-3.67904	0.000234111	0.0205707
K18669	13.5549	3.06695	0.8832	3.47254	0.00051555	0.0294189
K18728	13.3476	25.4985	6.31799	4.03586	5.44031e-05	0.00882177
K19176	10.0739	3.07355	0.91607	3.35515	0.000793224	0.0386074
K19610	63.1878	-2.16933	0.657053	-3.3016	0.000961346	0.0422354
K19640	53.363	-3.79247	1.01064	-3.75254	0.000175052	0.0168747
K19695	5.23496	7.12397	2.03984	3.49241	0.000478681	0.0281056
K19915	9.0049	30	6.31801	4.74833	2.05099e-06	0.00123276
K19939	122.605	-12.8228	3.2673	-3.92458	8.68807e-05	0.0112031
K20175	2.44868	5.10215	1.51585	3.36587	0.000763035	0.037665
K20181	13.1755	5.80666	1.75743	3.30407	0.000952922	0.0420514
K20192	322.95	17.9255	5.28914	3.38911	0.000701198	0.035873
K20279	50.1282	6.47711	1.70657	3.79539	0.000147409	0.0154285
K20353	37.0706	10.8932	2.58405	4.21556	2.49158e-05	0.0052636
K20359	9.75385	10.3678	2.73657	3.78861	0.00015149	0.0154285
K20477	2.95509	15.0562	4.54107	3.31557	0.000914563	0.0416546
K20644	15.0871	6.64175	1.95925	3.38996	0.00069904	0.035873
K20656	38.2914	6.06447	1.42341	4.26051	2.03959e-05	0.00467287
K21087	183.701	-2.2244	0.61993	-3.58814	0.000333042	0.0246774
K21851	7.23613	30	6.30248	4.76003	1.93564e-06	0.00123276
K22156	7.94549	25.175	6.31801	3.98463	6.75847e-05	0.00986836
K22270	193.306	3.68942	0.817577	4.51263	6.40301e-06	0.00201866
K22390	45.3185	3.32119	0.954633	3.47902	0.000503254	0.0288833
K22414	5.3637	30	6.31805	4.7483	2.05131e-06	0.00123276
K22543	1.91495	24.9925	6.30928	3.96123	7.45649e-05	0.0105765
K22657	2.77625	22.2595	6.29034	3.53868	0.00040213	0.0269799
K22817	2.48908	23.8881	6.31816	3.78086	0.000156286	0.0156744
K22886	12.6552	2.8606	0.813233	3.51757	0.000435524	0.0273691
K22935	32.2792	-4.36691	1.10886	-3.9382	8.20935e-05	0.0108681
K23297	2.48756	24.0576	6.31816	3.80769	0.000140271	0.0151386
K23326	5.13246	12.8734	3.10733	4.14293	3.42895e-05	0.0066757
K23425	21.6756	3.29672	0.961857	3.42746	0.000609265	0.0327165
K23554	2.78734	24.8486	6.30526	3.94093	8.11668e-05	0.0108681
K24006	20.2777	4.02446	0.997901	4.03293	5.50861e-05	0.00882177
K24427	22.2877	6.05448	1.32882	4.55627	5.20712e-06	0.00196866
K24434	63.697	4.02262	1.08886	3.69434	0.00022046	0.0198996
K24523	19.5945	4.5165	1.26042	3.58335	0.000339222	0.0246851
K24570	1248.52	-15.3629	3.06941	-5.00515	5.58178e-07	0.00112718
K24641	1.94561	22.1334	6.31823	3.5031	0.000459874	0.027842
K25442	10.282	6.88132	2.03386	3.38338	0.000715995	0.0361753
K25591	1.35867	22.325	6.31835	3.53336	0.000410309	0.0269799
K25668	7.37528	18.8084	3.94956	4.76215	1.91539e-06	0.00123276
		day1-day10
gene	baseMean	log2FoldChange	lfcSE	stat	pvalue	padj
K00181	2.95225	-12.1666	0.655338	-18.5653	6.13e-77	1.06e-74
K00747	1.64718	-3.95852	0.718964	-5.50586	3.67e-08	4.53e-06
K02321	3.71937	-2.27852	0.433558	-5.25539	1.48e-07	1.76e-05
K02514	2.33842	-2.79306	0.720663	-3.87568	0.000106329	0.00722528
K02607	7.97901	-13.6406	0.722052	-18.8914	1.34e-79	2.44e-77
K03898	19.8583	-23.2676	0.722052	-32.2242	8.08e-228	7.33e-225
K04131	9.84895	-12.2169	0.499683	-24.4492	5.13e-132	1.25e-129
K04194	17.1301	-22.9327	0.722052	-31.7604	2.28e-221	1.75e-218
K04347	38.8036	-24.5992	0.722052	-34.0685	2.16e-254	3.08e-251
K04366	10.5996	-21.3612	0.535137	-39.9172	0	0
K04390	1.11302	-20.1879	0.71917	-28.0711	2.21e-173	6.13e-171
K04404	10.3023	3.59862	0.717571	5.015	5.3e-07	5.89e-05
K04541	39.1297	-24.6373	0.722052	-34.1213	3.57e-255	6.2e-252
K04556	3.05466	-17.07	0.669237	-25.5067	1.66e-143	4.26e-141
K04604	1.97085	-13.1267	0.722052	-18.1796	7.48e-74	1.19e-71
K04829	1.28402	-13.5797	0.722052	-18.8071	6.6e-79	1.18e-76
K04965	3.34776	-22.5494	0.722052	-31.2296	4.23e-214	2.82e-211
K06279	43.1174	2.27567	0.700237	3.24986	0.00115462	0.046884
K06776	6.77782	-14.3218	0.722052	-19.8349	1.49e-87	3.1e-85
K07201	112.555	-4.42625	0.718047	-6.16428	7.08e-10	9.31e-08
K07820	1.54345	-21.2879	0.722052	-29.4825	4.83e-191	1.66e-188
K07970	5.39337	-19.3109	0.719208	-26.8503	8.37e-159	2.2e-156
K08019	5.00132	-14.4064	0.584133	-24.6629	2.67e-134	6.68e-132
K08051	3.72442	-13.0372	0.722052	-18.0557	7.12e-73	1.11e-70
K08362	1.56519	-20.744	0.722052	-28.7292	1.65e-181	4.7e-179
K08507	1.8692	-13.1754	0.722052	-18.2471	2.18e-74	3.51e-72
K08510	3.2282	-21.4752	0.722052	-29.7419	2.21e-194	8.81e-192
K08694	3.63657	-12.8353	0.71666	-17.9099	9.86e-72	1.52e-69
K08702	4.03001	-13.2955	0.722052	-18.4136	1.02e-75	1.7e-73
K08707	2.53275	-12.3444	0.722052	-17.0963	1.58e-65	2.32e-63
K09035	4.92402	-19.4377	0.719201	-27.0267	7.17e-161	1.94e-158
K09171	7.56027	-15.6031	0.722052	-21.6094	1.47e-103	3.4e-101
K09427	1.40215	-21.2488	0.722052	-29.4283	2.39e-190	7.7e-188
K09662	22.7195	-14.9404	0.722052	-20.6915	4.13e-95	9.16e-93
K09663	14.4888	-24.6365	0.722052	-34.12	3.72e-255	6.2e-252
K10100	3.71732	-21.3917	0.722052	-29.6262	6.87e-193	2.64e-190
K10425	8.26071	-23.1077	0.722052	-32.0028	9.98e-225	8.3e-222
K10453	4.26078	-21.3489	0.722052	-29.5669	3.98e-192	1.42e-189
K10475	3.17937	-20.7346	0.712195	-29.1137	2.41e-186	7.07e-184
K10485	4.81521	-2.50898	0.527896	-4.75279	2.01e-06	0.000210956
K10639	1.67388	-21.0944	0.722052	-29.2146	1.27e-187	3.95e-185
K10790	8.59041	-16.2871	0.721947	-22.5599	1.07e-112	2.55e-110
K11205	1.38818	-15.4617	0.722052	-21.4135	9.99e-102	2.27e-99
K11256	3.79241	3.00779	0.716773	4.1963	2.71e-05	0.00220337
K11668	1.69308	-13.3003	0.722052	-18.4201	9.06e-76	1.53e-73
K11980	2.87971	-12.6065	0.722052	-17.4592	2.93e-68	4.37e-66
K11988	4.14635	-2.19148	0.603637	-3.63047	0.00028291	0.015966
K12013	1.74997	-22.0777	0.722052	-30.5764	2.52e-205	1.33e-202
K12404	4.41009	-11.9089	0.588471	-20.237	4.62e-91	9.82e-89
K12496	1.3478	-22.2811	0.722052	-30.8581	4.37e-209	2.57e-206
K12505	3.9643	-13.204	0.722052	-18.2868	1.05e-74	1.73e-72
K13129	1.35867	-21.6383	0.722052	-29.9677	2.59e-197	1.12e-194
K13130	7.78245	-23.6258	0.722052	-32.7203	8.03e-235	1e-231
K13170	4.55426	-21.2489	0.722052	-29.4285	2.38e-190	7.7e-188
K14074	228.709	-21.5764	0.722052	-29.8821	3.36e-196	1.4e-193
K14343	2.54761	-15.7755	0.339418	-46.4781	0	0
K15348	7.17377	-23.5707	0.722052	-32.6441	9.73e-234	9.71e-231
K15591	2.9274	-3.3454	0.718998	-4.65286	3.27e-06	0.000330298
K15630	4.24288	-14.1374	0.722052	-19.5795	2.31e-85	4.72e-83
K16452	4.48904	-21.6551	0.722052	-29.991	1.29e-197	6.12e-195
K16773	4.13035	-21.0512	0.722052	-29.1547	7.28e-187	2.2e-184
K17401	1.91611	-12.2387	0.722052	-16.9499	1.93e-64	2.79e-62
K17414	1.59779	-21.3529	0.722052	-29.5725	3.37e-192	1.25e-189
K17454	78.2811	-25.0214	0.722052	-34.6531	4.01e-263	1e-259
K17503	2.68638	2.084	0.486742	4.28153	1.86e-05	0.00159937
K17576	2.58691	-22.6166	0.722052	-31.3227	2.29e-215	1.63e-212
K17885	1.72612	-13.5563	0.722052	-18.7747	1.22e-78	2.13e-76
K18728	13.3476	-25.1963	0.722052	-34.8955	8.71e-267	2.9e-263
K19878	6.71629	-13.7884	0.722052	-19.0961	2.72e-81	5.23e-79
K19939	122.605	-3.08352	0.381697	-8.07845	6.56e-16	9.23e-14
K20030	10.7194	-2.19014	0.55994	-3.91137	9.18e-05	0.00641064
K20822	1.85449	-13.8464	0.722052	-19.1765	5.82e-82	1.16e-79
K21873	6.24794	-13.748	0.722052	-19.0401	7.93e-81	1.49e-78
K22156	7.94549	-23.5831	0.722052	-32.6612	5.55e-234	6.16e-231
K22371	3.56761	-12.8101	0.722052	-17.7412	2.02e-70	3.05e-68
K22543	1.91495	-2.33421	0.720595	-3.23928	0.00119833	0.0480729
K22817	2.48908	-22.1066	0.722052	-30.6164	7.41e-206	4.11e-203
K23297	2.48756	-21.8402	0.722052	-30.2474	5.65e-201	2.82e-198
K23554	2.78734	-2.5982	0.719955	-3.60883	0.00030758	0.0167007
K24317	4.09741	-13.7909	0.722052	-19.0995	2.55e-81	4.99e-79
K24626	3.09593	-13.7055	0.722052	-18.9814	2.43e-80	4.5e-78
K24641	1.94561	-22.3461	0.722052	-30.948	2.7e-210	1.69e-207
K25304	1.48846	-11.649	0.722052	-16.1332	1.49e-58	2.13e-56
K25591	1.35867	-21.6383	0.722052	-29.9677	2.59e-197	1.12e-194
K25605	2.44321	-14.7327	0.722052	-20.404	1.54e-92	3.35e-90
		interaction condition and day
gene	baseMean	log2FoldChange	lfcSE	stat	pvalue	padj
K00181	2.95225	10.7821	0.853762	12.6289	1.46e-36	6.38e-34
K00846	6.7081	-6.27265	0.760703	-8.24586	1.64e-16	3.9e-14
K02514	2.33842	-5.15162	0.949459	-5.42585	5.77e-08	7.49e-06
K02607	7.97901	6.30833	1.01815	6.1959	5.8e-10	8.09e-08
K03126	2.43988	-3.03927	0.566466	-5.36532	8.08e-08	1.02e-05
K03132	5.4648	-3.88572	0.695432	-5.58749	2.3e-08	3.09e-06
K04131	9.84895	11.2777	0.669202	16.8524	1.01e-63	5.27e-61
K04366	10.5996	19.6057	0.721136	27.1873	9.18e-163	4.81e-159
K04390	1.11302	-13.2628	1.01909	-13.0143	1.01e-38	4.83e-36
K04404	10.3023	-10.5597	1.01796	-10.3734	3.28e-25	9.81e-23
K04405	4.69418	-4.20115	0.787456	-5.33509	9.55e-08	1.19e-05
K04556	3.05466	15.2779	0.875245	17.4555	3.13e-68	1.72e-65
K04604	1.97085	7.23087	1.01817	7.10184	1.23e-12	2.19e-10
K04706	30.3926	-2.82421	0.799147	-3.53402	0.000409283	0.0318358
K04829	1.28402	6.59352	1.01911	6.4699	9.81e-11	1.51e-08
K05293	4.99947	-3.60132	0.705762	-5.10274	3.35e-07	3.94e-05
K06065	20.4054	-23.0627	1.01616	-22.696	4.91e-114	1.71e-110
K06170	4.24273	-2.44828	0.645122	-3.79506	0.000147609	0.0132117
K06578	7.26784	-21.5853	1.01854	-21.1923	1.13e-99	1.47e-96
K06776	6.77782	5.34685	0.993501	5.38182	7.37e-08	9.42e-06
K07201	112.555	3.7183	1.01028	3.68046	0.000232818	0.0195046
K07207	4.62157	-6.57003	0.982838	-6.68476	2.31e-11	3.84e-09
K07839	4.46638	-9.37841	1.01894	-9.20411	3.45e-20	8.39e-18
K07970	5.39337	-7.98924	1.01706	-7.85522	3.99e-15	8.36e-13
K08019	5.00132	10.2205	0.760528	13.4387	3.59e-41	1.79e-38
K08051	3.72442	9.88746	1.01771	9.71542	2.59e-22	6.79e-20
K08507	1.8692	11.4837	1.01738	11.2875	1.51e-29	5.66e-27
K08694	3.63657	8.67907	0.915407	9.48111	2.52e-21	6.43e-19
K08702	4.03001	9.52008	1.0179	9.3527	8.54e-21	2.13e-18
K08707	2.53275	6.4045	1.01802	6.29114	3.15e-10	4.58e-08
K09035	4.92402	-7.65857	1.01706	-7.53012	5.07e-14	1e-11
K09052	2.73972	-20.0184	1.01654	-19.6927	2.49e-86	1.63e-83
K09171	7.56027	6.69647	1.01898	6.57171	4.97e-11	8.01e-09
K09392	3.68001	-6.83254	0.90509	-7.54902	4.39e-14	8.83e-12
K09662	22.7195	6.16264	1.01818	6.05258	1.43e-09	1.96e-07
K09855	1.92852	-6.64452	0.986524	-6.73528	1.64e-11	2.76e-09
K10427	9.90278	-3.07754	0.689708	-4.46209	8.12e-06	0.000894697
K10435	14.9528	-2.87036	0.771003	-3.72289	0.000196953	0.0170454
K10475	3.17937	18.5945	0.90948	20.4452	6.62e-93	5.37e-90
K10572	7.58951	-22.4894	1.00646	-22.3452	1.35e-110	3.52e-107
K10790	8.59041	-8.25732	1.01899	-8.10341	5.34e-16	1.22e-13
K10903	2.89833	-3.28597	0.951073	-3.45502	0.000550255	0.0405794
K10990	2.95933	-5.32771	0.982037	-5.42517	5.79e-08	7.49e-06
K10994	2.20514	-21.0437	0.989592	-21.265	2.39e-100	3.58e-97
K11205	1.38818	11.4416	1.0177	11.2426	2.52e-29	9.09e-27
K11256	3.79241	-3.44745	0.995278	-3.46381	0.000532591	0.0395553
K11363	13.6624	-6.65467	0.601718	-11.0595	1.97e-28	6.89e-26
K11393	5.23185	-2.67169	0.618656	-4.31855	1.57e-05	0.00171327
K11668	1.69308	12.4937	1.0173	12.2812	1.14e-34	4.6e-32
K11803	3.68668	-2.56206	0.482948	-5.30504	1.13e-07	1.39e-05
K11973	17.6834	-21.5506	1.01721	-21.1859	1.29e-99	1.5e-96
K11980	2.87971	10.5328	0.962286	10.9456	6.97e-28	2.36e-25
K12404	4.41009	9.77198	0.764395	12.7839	2.02e-37	9.18e-35
K12505	3.9643	10.2845	1.01758	10.1069	5.15e-24	1.5e-21
K12865	5.29141	-6.0988	1.01816	-5.99005	2.1e-09	2.85e-07
K13862	1.94614	-4.19711	1.01834	-4.12152	3.76e-05	0.00386416
K14074	228.709	11.7675	1.0179	11.5606	6.53e-31	2.53e-28
K14169	2.90085	-4.76419	0.730606	-6.52088	6.99e-11	1.11e-08
K14343	2.54761	14.9201	0.461989	32.2952	8.16e-229	8.55e-225
K14782	4.26864	-3.42822	0.527932	-6.49367	8.38e-11	1.31e-08
K14784	2.88018	-2.54967	0.654188	-3.89745	9.72e-05	0.00917102
K14972	10.7391	-8.14743	1.01559	-8.02236	1.04e-15	2.31e-13
K15141	2.10394	-5.4487	0.992873	-5.48781	4.07e-08	5.39e-06
K15414	2.34803	-2.46949	0.669936	-3.68616	0.000227667	0.0193738
K15591	2.9274	-3.69052	0.947445	-3.89523	9.81e-05	0.00917279
K15630	4.24288	7.46628	1.01817	7.33305	2.25e-13	4.21e-11
K16273	2.9337	-20.785	1.01663	-20.4449	6.67e-93	5.37e-90
K16529	9.19871	-22.0583	1.01776	-21.6733	3.67e-104	7.68e-101
K16573	3.58814	-4.78165	0.922997	-5.18057	2.21e-07	2.66e-05
K16739	1.79513	-21.0855	1.0191	-20.6904	4.23e-95	4.03e-92
K16810	1.61882	-20.1286	1.01773	-19.778	4.6e-87	3.21e-84
K17401	1.91611	10.8382	1.01734	10.6535	1.68e-26	5.33e-24
K17418	2.54055	-20.3341	0.954147	-21.3112	8.93e-101	1.56e-97
K17503	2.68638	-4.08827	0.645607	-6.33245	2.41e-10	3.56e-08
K17583	4.95676	-5.74194	0.546349	-10.5096	7.8e-26	2.4e-23
K17885	1.72612	12.6046	1.01731	12.3901	2.96e-35	1.24e-32
K19307	1.77154	-7.97355	0.982243	-8.11769	4.75e-16	1.11e-13
K19878	6.71629	6.74603	1.01811	6.62602	3.45e-11	5.64e-09
K19915	9.0049	-20.5055	1.01907	-20.1219	4.75e-90	3.55e-87
K19939	122.605	3.34601	0.532155	6.28767	3.22e-10	4.62e-08
K20192	322.95	-3.03682	0.851303	-3.56727	0.000360723	0.0288358
K20359	9.75385	-2.80701	0.447829	-6.26804	3.66e-10	5.17e-08
K20477	2.95509	-5.8014	0.732826	-7.91648	2.44e-15	5.22e-13
K20633	3.43381	-5.86508	0.810036	-7.24051	4.47e-13	8.07e-11
K20818	1.77752	-5.26165	0.993553	-5.29579	1.19e-07	1.44e-05
K20822	1.85449	7.49783	1.01854	7.36137	1.82e-13	3.47e-11
K21851	7.23613	-7.5501	1.01559	-7.43418	1.05e-13	2.04e-11
K21873	6.24794	7.07441	1.01801	6.94927	3.67e-12	6.41e-10
K22371	3.56761	9.95345	1.01773	9.78007	1.37e-22	3.68e-20
K22414	5.3637	-21.1416	1.01907	-20.7459	1.34e-95	1.4e-92
K22543	1.91495	-19.1391	1.01806	-18.7995	7.62e-79	4.43e-76
K23326	5.13246	-5.05727	0.505944	-9.99572	1.59e-23	4.39e-21
K23362	3.34616	-6.00338	0.881192	-6.81279	9.57e-12	1.64e-09
K23554	2.78734	-19.2869	1.0176	-18.9533	4.15e-80	2.55e-77
K23611	5.87366	-6.85482	0.8853	-7.74294	9.71e-15	1.99e-12
K24174	2.76354	-6.16571	0.95554	-6.45259	1.1e-10	1.67e-08
K24317	4.09741	7.46035	1.01802	7.32827	2.33e-13	4.28e-11
K24570	1248.52	2.11854	0.492909	4.29804	1.72e-05	0.0018603
K24626	3.09593	10.1955	0.942057	10.8225	2.69e-27	8.81e-25
K25304	1.48846	8.12629	1.01803	7.98235	1.44e-15	3.13e-13
K25605	2.44321	6.48773	1.01909	6.36622	1.94e-10	2.9e-08
K25668	7.37528	-6.4182	0.637138	-10.0735	7.24e-24	2.05e-21

## Sheet: fungi
Fungi		control vs treatment
Kos	baseMean	log2FoldChange	lfcSE	stat	pvalue	padj
K00048	28.1913	3.00114	0.934286	3.21222	0.00131711	0.0259113
K00139	39.9294	3.21396	0.983313	3.2685	0.00108119	0.0229099
K00227	14.3126	5.03927	1.47167	3.42419	0.000616643	0.0169739
K00671	15.5693	3.01769	0.916058	3.29421	0.000986973	0.0216881
K00693	65.3972	2.23094	0.540213	4.12975	3.63e-05	0.00330176
K00696	95.7163	-2.60781	0.835917	-3.11969	0.00181039	0.0317896
K00698	46.1119	4.935	1.42352	3.46677	0.000526762	0.0154968
K00771	10.4787	14.0438	3.13643	4.47764	7.55e-06	0.00126174
K00815	30.6881	4.15812	0.821684	5.06048	4.18e-07	0.000223503
K00861	8.80395	3.37571	1.02262	3.30104	0.000963262	0.0215002
K00863	59.2592	7.37562	1.49655	4.92841	8.29e-07	0.000332293
K00888	16.3787	5.02224	1.51331	3.31872	0.000904303	0.0208454
K00894	19.6462	3.03834	0.896127	3.39052	0.000697594	0.017931
K00914	14.0803	4.49682	1.27342	3.5313	0.000413515	0.0134848
K00920	9.85291	5.38922	1.57734	3.41665	0.000633958	0.017319
K00921	10.5189	4.86343	1.20194	4.0463	5.2e-05	0.00391062
K00922	15.8065	3.43638	0.863757	3.97842	6.94e-05	0.00458914
K00925	2045.68	-3.60035	0.666854	-5.39901	6.7e-08	5.36e-05
K00967	34.6993	2.80103	0.87947	3.1849	0.00144803	0.0275842
K00968	19.0056	3.99824	1.12157	3.56487	0.000364043	0.0125974
K00972	19.0057	4.22581	1.02281	4.13156	3.6e-05	0.00330176
K00993	11.3564	5.66231	1.40661	4.02549	5.69e-05	0.00402178
K00994	10.0257	5.46202	1.59968	3.41445	0.000639109	0.017319
K00999	7.40375	3.41999	1.07677	3.17615	0.00149244	0.0282068
K01076	15.7251	2.98884	0.900755	3.31816	0.000906141	0.0208454
K01159	342.803	2.92456	0.904669	3.23274	0.00122607	0.0247579
K01166	16.0268	4.91158	1.43229	3.42917	0.000605424	0.0168329
K01194	75.5493	3.36942	0.979779	3.43896	0.000583955	0.0165712
K01196	19.6778	3.34536	1.12517	2.9732	0.00294714	0.0424539
K01201	26.0199	2.49395	0.77762	3.20716	0.00134051	0.0262294
K01218	29.5463	2.39694	0.822957	2.9126	0.00358437	0.0484973
K01230	27.5484	5.45999	0.851367	6.41321	1.42e-10	3.43e-07
K01253	14.6719	2.74477	0.835778	3.28409	0.00102311	0.0221175
K01257	19.9904	3.43693	1.1095	3.09774	0.00195004	0.0332613
K01275	83.1054	2.75347	0.79335	3.47068	0.000519141	0.0153722
K01278	15.8923	2.13579	0.608518	3.50983	0.000448396	0.0141428
K01285	17.7933	4.09105	1.22954	3.32731	0.000876889	0.0207265
K01315	24.5167	6.68942	1.34219	4.98395	6.23e-07	0.000285384
K01365	431.235	2.06668	0.533955	3.87052	0.000108605	0.00583677
K01373	147.503	2.76983	0.572272	4.84005	1.3e-06	0.000480283
K01379	105.83	2.49001	0.706406	3.5249	0.000423637	0.0137218
K01388	26.4484	3.51728	1.01551	3.46357	0.000533054	0.0155866
K01408	68.6996	2.8298	0.672817	4.2059	2.6e-05	0.00279611
K01409	15.2074	4.84047	0.967271	5.00425	5.61e-07	0.000269748
K01410	136.016	3.00041	0.957984	3.13201	0.00173615	0.0311019
K01530	86.7751	3.43388	0.695224	4.93925	7.84e-07	0.000328016
K01608	1494.9	4.04442	0.861128	4.69665	2.64e-06	0.000640457
K01672	24.8812	2.84891	0.763094	3.73337	0.000188938	0.00799321
K01697	746.373	2.58521	0.666886	3.87654	0.000105951	0.00577214
K01787	84.8398	-3.95867	1.30453	-3.03456	0.00240887	0.0380514
K01930	20.0546	2.58175	0.691863	3.73159	0.000190275	0.00799321
K01988	3.18031	16.1902	3.71733	4.35534	1.33e-05	0.00177519
K02049	63.4172	3.92414	0.944853	4.15318	3.28e-05	0.0032187
K02084	22.1019	2.99827	0.85874	3.49148	0.000480358	0.01467
K02154	89.9914	2.18999	0.712987	3.07157	0.00212933	0.0353175
K02178	15.7725	6.75706	1.92159	3.5164	0.000437449	0.0139816
K02207	15.8795	4.46967	1.26278	3.53955	0.000400812	0.0132959
K02209	13.1588	3.49352	1.05752	3.30351	0.000954829	0.0215002
K02212	19.2367	3.38162	0.909718	3.71721	0.000201433	0.00826939
K02213	5.90507	11.0152	2.98726	3.68738	0.000226577	0.00888772
K02216	9.92364	3.44982	0.869521	3.96749	7.26e-05	0.00462105
K02219	4.466	3.29592	1.09379	3.01329	0.00258429	0.0395199
K02324	26.3121	4.80081	0.890498	5.39116	7e-08	5.36e-05
K02327	11.3217	3.43318	0.971345	3.53446	0.000408605	0.0134616
K02374	22.2196	6.96325	1.61821	4.30305	1.68e-05	0.00213234
K02540	14.8855	3.52096	1.02793	3.42529	0.000614152	0.0169739
K02541	9.31304	3.80984	0.99476	3.82991	0.000128192	0.00660932
K02606	8.14997	8.40347	2.46412	3.41033	0.000648837	0.0174352
K02636	609.663	2.3789	0.791746	3.00462	0.0026591	0.0400949
K02695	1.98671	-5.54615	1.89597	-2.92523	0.00344203	0.0470346
K02739	23.2758	2.44281	0.775209	3.15116	0.00162622	0.0299618
K02999	19.8808	2.86377	0.971834	2.94676	0.00321118	0.0447055
K03018	22.7245	3.11781	0.977513	3.18953	0.00142504	0.0273827
K03021	19.9531	2.69495	0.844991	3.18932	0.00142607	0.0273827
K03032	65.1267	2.22629	0.756423	2.94319	0.00324854	0.0449654
K03033	24.7094	2.95377	0.947106	3.11873	0.00181633	0.0317896
K03035	36.9808	3.2479	0.935288	3.47262	0.000515398	0.0153503
K03036	28.3521	2.47228	0.820151	3.01442	0.0025747	0.0395199
K03037	24.8721	2.39103	0.804144	2.97338	0.00294536	0.0424539
K03065	34.9314	3.01729	0.702886	4.29272	1.76e-05	0.00217679
K03083	39.8853	3.67447	0.853179	4.3068	1.66e-05	0.00212448
K03097	37.7914	2.4096	0.791734	3.04345	0.00233882	0.0373125
K03099	11.5323	4.95398	1.2678	3.90753	9.32e-05	0.00545844
K03115	17.3087	3.19518	0.965533	3.30924	0.000935488	0.0213256
K03135	3.25441	12.493	3.63617	3.43577	0.000590882	0.0166207
K03145	14.1272	5.44369	1.50412	3.61918	0.000295538	0.0106806
K03178	103.53	2.39685	0.712719	3.36296	0.000771111	0.0191682
K03238	33.0477	3.02418	0.888595	3.40333	0.00066571	0.0175757
K03239	8.41616	4.04812	1.35206	2.99405	0.00275304	0.0409973
K03240	14.3253	4.60698	1.23884	3.7188	0.000200175	0.00826472
K03242	47.9133	2.02004	0.617466	3.2715	0.00106979	0.0228793
K03258	15.109	4.1443	1.36058	3.04599	0.00231915	0.0372254
K03260	47.9491	2.85901	0.974851	2.93277	0.00335954	0.0461697
K03262	50.2973	4.01173	1.17882	3.40317	0.000666095	0.0175757
K03264	35.1361	2.65965	0.685101	3.88213	0.000103544	0.00575774
K03265	61.8238	2.50269	0.778992	3.21273	0.00131481	0.0259113
K03281	13.5584	3.81523	1.1787	3.2368	0.0012088	0.0246152
K03331	25.7842	2.66698	0.671051	3.97434	7.06e-05	0.00458914
K03363	28.9607	3.16667	0.747624	4.23565	2.28e-05	0.00260994
K03456	37.6416	2.59632	0.747259	3.47445	0.000511893	0.0153408
K03648	125.969	2.31577	0.624233	3.70979	0.000207434	0.0084199
K03768	3138.52	-2.02367	0.554933	-3.64669	0.000265643	0.00986736
K03849	7.91322	6.59413	2.04313	3.22746	0.00124894	0.0250309
K03862	302.864	2.99541	0.901192	3.32383	0.000887899	0.020732
K03898	2.47693	23.221	6.31804	3.67534	0.000237532	0.00912834
K03927	7.31388	3.02576	0.961791	3.14597	0.00165538	0.0303329
K04163	2.55166	30	6.318	4.74834	2.05e-06	0.000533253
K04194	4.80744	25.9118	6.31799	4.10127	4.11e-05	0.00342035
K04347	2.18409	22.1594	6.31805	3.50731	0.000452657	0.0141821
K04348	37.246	3.91823	0.805443	4.86469	1.15e-06	0.000441116
K04353	54.433	2.23577	0.659257	3.39135	0.00069548	0.017931
K04354	29.1454	2.54649	0.725042	3.51219	0.000444428	0.0140911
K04365	15.7584	8.05147	1.44053	5.58923	2.28e-08	3.13e-05
K04371	24.4844	3.29535	0.732164	4.50084	6.77e-06	0.00120582
K04372	89.6933	3.40366	1.11504	3.05249	0.00226954	0.03688
K04373	27.2329	3.33578	0.809514	4.12072	3.78e-05	0.00333341
K04382	51.1254	2.55344	0.68655	3.71923	0.00019983	0.00826472
K04405	5.31357	15.9753	5.0941	3.13604	0.00171249	0.0309664
K04412	8.91358	5.16213	1.1533	4.47595	7.61e-06	0.00126174
K04422	8.20834	4.63685	1.5475	2.99635	0.00273233	0.0408153
K04427	8.06575	4.04611	1.10109	3.67465	0.000238172	0.00912834
K04437	374.783	2.96392	0.738775	4.01194	6.02e-05	0.00416787
K04456	40.5845	2.53368	0.618763	4.09475	4.23e-05	0.00342035
K04459	34.9678	3.80184	1.07218	3.54591	0.000391261	0.0131513
K04461	17.99	5.42205	1.49143	3.63548	0.000277467	0.0101879
K04482	18.142	3.10024	0.715998	4.32995	1.49e-05	0.00193886
K04505	9.89672	5.18276	1.70846	3.03359	0.00241663	0.0381114
K04513	25.0827	3.44795	1.10819	3.11133	0.00186249	0.0323414
K04532	14.0324	3.48336	1.09301	3.18695	0.00143784	0.0274444
K04534	19.3086	2.75605	0.845384	3.26012	0.00111365	0.0232393
K04539	14.8033	4.29703	0.932523	4.60796	4.07e-06	0.000889067
K04541	2.44033	23.3432	6.31804	3.69469	0.000220157	0.008788
K04554	40.6654	3.00426	0.687238	4.3715	1.23e-05	0.00169578
K04570	8.43133	24.8161	6.31797	3.92785	8.57e-05	0.00512118
K04684	3.43493	28.5491	4.35104	6.56144	5.33e-11	1.71e-07
K04761	109.75	3.42112	0.864304	3.95824	7.55e-05	0.00474739
K04799	13.7414	3.48654	1.00287	3.47657	0.000507878	0.0152681
K04965	3.7581	25.0587	6.31801	3.96624	7.3e-05	0.00462105
K04984	33.0083	3.90912	1.00781	3.87883	0.000104959	0.00577214
K05012	22.3029	4.08941	1.27517	3.20696	0.00134146	0.0262294
K05016	14.8519	2.98865	0.824467	3.62495	0.000289015	0.0104918
K05022	30.5703	6.35068	1.6807	3.77859	0.000157717	0.00732284
K05034	10.5023	4.87393	1.44824	3.36541	0.00076429	0.0190479
K05121	25.2087	5.40847	1.57412	3.43586	0.000590673	0.0166207
K05236	61.2011	2.84454	0.838947	3.39061	0.000697367	0.017931
K05355	25.4066	3.0563	0.975108	3.13432	0.00172252	0.0310893
K05361	18.168	2.67389	0.84533	3.16313	0.00156085	0.0291412
K05546	33.5902	2.11212	0.706071	2.99137	0.00277726	0.0411668
K05637	18.6443	5.6301	1.57374	3.57754	0.000346846	0.0120893
K05641	32.0526	5.24123	1.34679	3.89163	9.96e-05	0.00563456
K05665	59.5008	4.22601	0.809768	5.21879	1.8e-07	0.000109811
K05673	16.1174	3.73128	1.07766	3.4624	0.000535378	0.0156071
K05692	3430.53	2.28667	0.558206	4.09646	4.2e-05	0.00342035
K05698	5.97348	5.53012	1.69248	3.26746	0.00108519	0.022944
K05725	5.57232	7.99919	2.3054	3.46976	0.000520931	0.0153723
K05728	7.59169	5.34483	1.53649	3.47859	0.000504065	0.015201
K05749	35.8538	3.78204	0.923674	4.09457	4.23e-05	0.00342035
K05756	36.6975	2.43309	0.714807	3.40384	0.000664454	0.0175757
K05757	64.425	2.2223	0.672926	3.30245	0.000958445	0.0215002
K05758	46.1213	3.35389	0.892781	3.75668	0.000172182	0.00759811
K05759	109.492	2.2698	0.632094	3.59092	0.000329508	0.0116969
K05760	26.1091	4.15454	0.998102	4.16244	3.15e-05	0.00318837
K05798	8.70194	-2.44653	0.844794	-2.89601	0.00377938	0.0498049
K05809	9.28642	4.56547	1.47324	3.09892	0.00194225	0.0331873
K05815	225.421	2.22736	0.631069	3.52951	0.000416338	0.013531
K05850	127.481	2.98855	0.695692	4.29579	1.74e-05	0.00217475
K05906	3.73273	4.92416	1.63724	3.0076	0.00263321	0.0400181
K05929	11.5809	3.70783	0.95323	3.88976	0.000100343	0.00564505
K06027	33.7196	2.1259	0.680097	3.12588	0.00177276	0.0314068
K06069	11.5201	3.76594	1.23856	3.04058	0.00236121	0.0375451
K06095	11.6304	4.45552	1.44666	3.07987	0.00207091	0.0347682
K06128	17.5944	4.14635	1.01623	4.08013	4.5e-05	0.00357845
K06184	68.1229	2.90309	0.880438	3.29733	0.00097609	0.0216359
K06185	220.73	2.35739	0.688213	3.42537	0.000613953	0.0169739
K06210	6.05794	5.28995	1.23891	4.26985	1.96e-05	0.00229473
K06270	14.5384	4.75783	1.08641	4.37942	1.19e-05	0.00165904
K06271	87.6317	3.33841	0.780323	4.27824	1.88e-05	0.00223729
K06272	7.64623	5.58495	1.6194	3.44877	0.000563141	0.0161714
K06277	7.11346	4.37686	1.46563	2.98633	0.00282351	0.0414275
K06351	7.5417	3.5023	1.10857	3.1593	0.00158151	0.0293142
K06578	8.16677	30	6.31243	4.75253	2.01e-06	0.000533253
K06631	21.5525	4.03096	0.961422	4.1927	2.76e-05	0.00288233
K06641	10.183	2.01148	0.57718	3.48502	0.000492103	0.0149339
K06674	9.22596	2.97397	0.896602	3.31694	0.000910092	0.0208454
K06675	9.01278	2.95243	0.869917	3.39392	0.000689008	0.0179142
K06685	29.3798	2.34051	0.693733	3.37378	0.000741427	0.0187698
K06704	14.8145	4.87225	1.22697	3.97095	7.16e-05	0.00462105
K06965	20.1478	3.98695	1.06282	3.75131	0.000175915	0.00762298
K07151	71.6447	3.09785	0.750206	4.12934	3.64e-05	0.00330176
K07179	31.7003	2.1583	0.653784	3.30125	0.000962562	0.0215002
K07199	19.4676	3.89818	1.15678	3.36985	0.000752087	0.01894
K07200	92.6309	3.95695	0.740769	5.34168	9.21e-08	6.33e-05
K07203	31.4056	2.56812	0.68403	3.7544	0.00017376	0.00760841
K07238	11.2749	2.46928	0.753442	3.27733	0.00104792	0.0226031
K07241	2.25191	-3.88377	1.30885	-2.96731	0.0030042	0.0427521
K07404	26.5726	2.53918	0.667205	3.8057	0.000141405	0.00709176
K07424	34.6778	5.40278	1.58388	3.41111	0.000646989	0.0174352
K07427	97.8664	6.57587	1.47993	4.44337	8.86e-06	0.00135231
K07575	7.26077	4.18557	1.31453	3.18407	0.00145219	0.0276088
K07653	101.77	2.749	0.889127	3.0918	0.0019895	0.0336504
K07825	6.3927	4.13674	1.13736	3.63714	0.000275679	0.010161
K07860	23.8798	2.87322	0.960474	2.99146	0.00277648	0.0411668
K07876	9.03624	4.92388	1.506	3.2695	0.00107737	0.0228793
K07881	8.85098	2.8599	0.941126	3.03881	0.00237513	0.0376376
K07893	19.8003	3.38182	0.936027	3.61295	0.000302728	0.0108262
K07901	42.0513	2.37122	0.73073	3.245	0.00117452	0.024151
K07903	8.91772	5.37234	1.7488	3.07202	0.00212614	0.0353175
K07904	39.5069	2.64083	0.678291	3.89335	9.89e-05	0.00562788
K07941	8.6016	3.88558	0.977174	3.97635	7e-05	0.00458914
K07944	9.49699	3.23127	1.1149	2.89825	0.00375254	0.0496842
K07955	18.3503	3.37155	0.963376	3.49973	0.000465736	0.0143602
K08017	65.2501	2.98399	0.953105	3.13081	0.00174325	0.0311133
K08056	33.7762	4.41277	1.06175	4.15613	3.24e-05	0.0032187
K08150	10.8832	3.06158	1.00057	3.05985	0.00221451	0.0362306
K08161	20.481	-2.89877	0.942031	-3.07715	0.00208989	0.0350256
K08269	37.1763	2.96322	0.734562	4.03399	5.48e-05	0.00397061
K08272	21.5314	3.51234	1.19628	2.93605	0.00332422	0.0458151
K08279	120.477	-3.98563	0.980901	-4.06324	4.84e-05	0.0037346
K08291	11.2436	4.59635	1.38228	3.32521	0.000883535	0.020732
K08334	6.29106	6.6877	2.15552	3.10259	0.00191837	0.0329548
K08337	8.38074	3.58979	1.19174	3.01224	0.00259332	0.0395199
K08341	48.0311	2.58059	0.686242	3.76047	0.000169596	0.0075533
K08582	10.2862	4.43458	1.17117	3.78647	0.000152805	0.00731334
K08588	6.80627	11.877	3.148	3.77288	0.000161376	0.00732284
K08655	15.9146	2.89644	0.720355	4.02086	5.8e-05	0.00407179
K08710	10.6818	3.36877	1.07124	3.14473	0.0016624	0.0303459
K08735	3.27873	-4.77971	1.33408	-3.58278	0.000339959	0.0119134
K08745	44.229	2.92893	0.773192	3.7881	0.000151802	0.00730168
K08789	44.9984	2.52377	0.845944	2.98337	0.00285092	0.0416807
K08791	15.5873	3.06998	0.991659	3.0958	0.00196281	0.0333608
K08798	28.8422	2.74747	0.888906	3.09084	0.00199589	0.033685
K08799	19.2248	3.19454	1.07548	2.97034	0.00297469	0.0426476
K08800	17.3919	3.31565	0.829639	3.9965	6.43e-05	0.00438603
K08802	8.49906	5.61312	1.62969	3.44429	0.000572555	0.0163454
K08803	22.2568	4.93524	1.08242	4.55946	5.13e-06	0.00100685
K08805	26.7691	4.77986	1.13841	4.19871	2.68e-05	0.00283778
K08808	2.84936	4.65686	1.32948	3.50277	0.000460452	0.0142429
K08819	14.6921	2.99224	0.86548	3.45732	0.000545574	0.0158113
K08824	19.582	4.45507	1.32962	3.35063	0.000806293	0.0196368
K08825	13.952	4.1455	1.00017	4.14481	3.4e-05	0.00327171
K08826	44.0498	5.07884	1.36344	3.72502	0.000195301	0.00813332
K08829	21.1219	3.43683	0.959387	3.58232	0.000340558	0.0119134
K08835	11.3086	3.51315	0.946989	3.70981	0.000207415	0.0084199
K08838	45.5243	4.05883	0.947941	4.28173	1.85e-05	0.00222996
K08855	3.91338	7.47263	1.97917	3.77565	0.000159592	0.00732284
K08860	30.0216	3.96929	1.02604	3.86855	0.000109484	0.00584935
K08861	12.4676	8.83427	2.32605	3.79798	0.000145883	0.00719757
K08864	22.2166	2.9951	0.994358	3.01209	0.00259457	0.0395199
K08867	41.621	2.90868	0.832719	3.49299	0.000477636	0.0146333
K08871	23.0814	7.8083	1.79558	4.34862	1.37e-05	0.00180535
K08874	35.7159	3.1073	1.04652	2.96919	0.00298584	0.0426802
K08892	11.7351	4.22118	1.27614	3.30776	0.000940443	0.0213503
K08900	482.521	5.83943	1.42684	4.09255	4.27e-05	0.00342035
K08959	14.2713	3.07883	0.987268	3.11854	0.00181749	0.0317896
K08960	12.4646	4.33354	1.10091	3.93632	8.27e-05	0.00499347
K08969	6.6596	3.77538	1.28419	2.93988	0.00328336	0.045317
K09097	15.6407	3.52259	1.09313	3.22249	0.00127083	0.0252591
K09228	28.0631	4.61119	1.1787	3.91208	9.15e-05	0.00540049
K09250	25.5824	2.89356	0.702565	4.11856	3.81e-05	0.00333415
K09276	14.6828	4.11346	1.33959	3.07068	0.00213574	0.0353228
K09404	8.56166	6.9582	2.05068	3.39311	0.000691029	0.0179183
K09427	1.57401	23.8471	6.31809	3.77441	0.000160388	0.00732284
K09485	58.1766	2.46511	0.835993	2.94872	0.00319095	0.0445529
K09518	6.72445	5.04657	1.34938	3.7399	0.000184092	0.00785415
K09519	6.23787	7.42774	2.00949	3.69633	0.000218734	0.0087676
K09530	9.51949	5.6001	1.82384	3.0705	0.00213699	0.0353228
K09565	62.6045	2.24972	0.715949	3.14229	0.00167633	0.0304845
K09566	27.3374	7.07721	1.35678	5.21619	1.83e-07	0.000109811
K09568	637.917	2.6424	0.881349	2.99813	0.00271638	0.0408153
K09582	39.0294	2.56331	0.783582	3.27127	0.00107066	0.0228793
K09595	13.5111	3.54931	1.17513	3.02035	0.00252481	0.039302
K09613	18.7287	2.79081	0.784723	3.55642	0.000375939	0.0127793
K09632	4.26009	5.86943	1.92732	3.04538	0.00232389	0.0372254
K09663	8.13849	24.9205	6.31797	3.94438	8e-05	0.0049067
K10085	8.08717	3.51816	1.09453	3.21432	0.00130754	0.0258286
K10100	4.17296	25.3819	6.318	4.01739	5.88e-05	0.00410217
K10151	3.78895	27.2952	6.01992	4.53415	5.78e-06	0.00105511
K10201	15.5258	3.22681	1.09722	2.9409	0.00327258	0.0452331
K10210	67.192	3.34432	1.05589	3.1673	0.00153861	0.028909
K10341	14.4313	3.71341	1.09812	3.3816	0.00072066	0.0183893
K10352	556.289	2.08274	0.556983	3.73932	0.000184515	0.00785415
K10364	29.8024	2.52738	0.852808	2.9636	0.00304064	0.0430795
K10365	48.4898	2.0757	0.673541	3.08177	0.00205775	0.0346076
K10380	65.6147	4.17314	1.38409	3.01507	0.00256918	0.0395199
K10392	22.4111	3.09601	0.749403	4.13131	3.61e-05	0.00330176
K10393	23.0581	4.21151	0.940638	4.47729	7.56e-06	0.00126174
K10398	12.9898	3.84253	0.961987	3.99437	6.49e-05	0.00439456
K10405	19.1962	5.40103	1.08981	4.95596	7.2e-07	0.000314717
K10413	141.215	2.9306	0.77724	3.77052	0.000162906	0.0073493
K10425	2.31831	23.298	6.31805	3.68753	0.000226442	0.00888772
K10453	4.78304	25.9233	6.31799	4.10309	4.08e-05	0.00342035
K10455	10.3679	6.72078	1.99028	3.3768	0.000733344	0.0186142
K10475	3.92125	-21.8707	5.76679	-3.79252	0.000149126	0.00724539
K10521	4.01062	3.94386	1.19662	3.29584	0.000981262	0.0216508
K10556	83.4671	4.41387	0.940074	4.69523	2.66e-06	0.000640457
K10570	3.72783	5.21937	1.76643	2.95476	0.00312911	0.0438799
K10572	2.84989	26.6195	5.12924	5.18975	2.11e-07	0.00011916
K10580	27.9123	2.66184	0.76644	3.47299	0.000514693	0.0153503
K10582	11.0561	6.17664	1.95296	3.16271	0.00156308	0.0291412
K10583	8.00839	4.3207	1.41319	3.05741	0.00223256	0.0364021
K10588	9.78871	6.45415	2.1338	3.02471	0.00248869	0.0389288
K10590	68.3299	3.68566	1.11957	3.29203	0.000994669	0.0217107
K10592	71.3537	4.72129	1.03346	4.56844	4.91e-06	0.00100574
K10626	18.9672	4.62263	1.1295	4.09265	4.26e-05	0.00342035
K10639	1.87905	22.3705	6.31807	3.54072	0.000399044	0.013283
K10645	78.9817	6.38058	1.01461	6.28873	3.2e-10	6.16e-07
K10666	8.27181	4.44178	1.34026	3.31413	0.000919298	0.0210063
K10686	15.7448	2.61851	0.741265	3.53249	0.000411667	0.0134848
K10688	7.58029	5.27459	1.69171	3.1179	0.00182148	0.0318015
K10699	5.00157	3.30755	1.07919	3.06485	0.00217779	0.0358739
K10755	21.7649	3.91732	1.32617	2.95387	0.00313819	0.0438799
K10756	14.3505	3.42724	0.975955	3.51168	0.000445291	0.0140911
K10776	1.7615	5.97431	1.59242	3.75173	0.000175619	0.00762298
K10779	8.25604	3.97307	1.25375	3.16894	0.00152993	0.0288023
K10841	14.5157	2.37076	0.771643	3.07235	0.00212377	0.0353175
K10854	704.182	-2.42218	0.760017	-3.18701	0.00143752	0.0274444
K10855	379.913	-2.31392	0.707632	-3.26996	0.00107564	0.0228793
K10858	3.22666	5.98115	1.83752	3.25501	0.0011339	0.0236107
K10875	9.43167	3.08441	0.974848	3.16399	0.0015562	0.0291412
K10899	72.6019	4.22698	1.29005	3.27661	0.00105061	0.0226105
K10900	18.6545	2.68455	0.643687	4.17059	3.04e-05	0.00311629
K10901	194.469	2.30192	0.757622	3.03835	0.00237876	0.0376376
K10902	27.3741	5.62777	1.68892	3.33217	0.000861722	0.0204497
K10903	3.18562	24.3475	6.30626	3.86085	0.000112994	0.00596421
K10908	14.0902	4.68345	1.2634	3.70702	0.000209715	0.0084767
K10956	143.586	2.99683	0.661102	4.53308	5.81e-06	0.00105511
K10960	259.126	-2.09918	0.596972	-3.51638	0.000437471	0.0139816
K10990	3.36902	30	6.30123	4.76098	1.93e-06	0.000533253
K10994	2.51639	25.1298	6.29929	3.98931	6.63e-05	0.0044578
K11137	2.57864	18.1902	5.34109	3.40571	0.000659916	0.0175757
K11163	9.86199	2.80923	0.809442	3.47058	0.000519331	0.0153722
K11262	87.9702	2.65453	0.780543	3.40087	0.00067171	0.0175757
K11290	53.7211	4.23827	1.16223	3.64667	0.00026566	0.00986736
K11304	7.22137	4.16651	1.25055	3.33174	0.000863054	0.0204497
K11307	5.94851	6.16529	1.83466	3.36045	0.000778145	0.0192932
K11323	17.8968	5.22289	1.25247	4.17007	3.05e-05	0.00311629
K11348	6.86693	6.05961	1.76559	3.43206	0.000599015	0.0167515
K11354	1165.66	-3.06597	0.664539	-4.61367	3.96e-06	0.000885067
K11406	75.3963	3.95119	1.0409	3.79595	0.00014708	0.00721894
K11481	6.52259	4.50139	1.49216	3.0167	0.00255544	0.0395199
K11525	243.164	-2.08314	0.698406	-2.9827	0.00285717	0.0417086
K11583	10.7665	4.21088	1.16374	3.61839	0.000296437	0.0106806
K11600	28.9846	2.22522	0.62006	3.58872	0.000332312	0.0117531
K11647	32.3673	3.25417	1.07901	3.01588	0.00256231	0.0395199
K11798	15.8716	4.65075	1.22975	3.78186	0.000155661	0.00732284
K11825	19.6293	4.5431	0.9816	4.62826	3.69e-06	0.000844618
K11835	17.8474	3.83402	1.0145	3.77923	0.000157317	0.00732284
K11838	56.7132	3.30992	1.04751	3.15979	0.00157885	0.0293142
K11839	5.19752	6.15621	1.463	4.20792	2.58e-05	0.00279611
K11842	9.41595	5.74266	1.67728	3.42379	0.000617552	0.0169739
K11973	19.8786	30	6.28814	4.77088	1.83e-06	0.000533253
K11982	7.8873	4.88767	1.37635	3.55119	0.000383497	0.0129903
K11997	98.4756	2.9709	1.02089	2.9101	0.0036131	0.048749
K12013	1.96446	21.752	6.31806	3.44283	0.000575651	0.0163839
K12164	8.99361	3.81499	1.28988	2.95764	0.00310004	0.0437039
K12168	5.57855	10.3683	3.03058	3.42121	0.000623424	0.0170864
K12182	16.9439	5.8254	1.56208	3.72925	0.000192048	0.0080326
K12196	71.0339	2.83777	0.771764	3.67699	0.000235999	0.00912834
K12259	7.26727	3.44435	1.03834	3.31717	0.00090935	0.0208454
K12297	309.004	2.66579	0.658039	4.05111	5.1e-05	0.00386122
K12306	8.33804	7.73335	2.5345	3.05123	0.00227906	0.0369101
K12309	34.4397	5.43081	1.00847	5.38519	7.24e-08	5.36e-05
K12311	77.8354	4.85857	1.33492	3.63958	0.00027308	0.010104
K12394	11.5545	3.47614	1.13625	3.05931	0.00221844	0.0362333
K12396	16.7655	4.24681	0.967211	4.39078	1.13e-05	0.00162168
K12404	5.02945	14.5853	3.59741	4.0544	5.03e-05	0.0038376
K12478	5.34287	9.28407	2.27863	4.07441	4.61e-05	0.00360797
K12479	14.5424	3.81871	1.1564	3.30224	0.000959156	0.0215002
K12487	10.1685	4.30947	1.38248	3.11719	0.00182584	0.0318199
K12491	7.88575	4.52128	1.34862	3.35253	0.000800775	0.0196313
K12504	15.6225	5.30875	1.62688	3.26314	0.00110185	0.0231436
K12555	55.4064	2.45292	0.793395	3.09167	0.00199034	0.0336504
K12585	24.3737	2.81316	0.867593	3.24249	0.00118489	0.0243042
K12589	38.216	2.68996	0.608943	4.41743	9.99e-06	0.00150134
K12598	40.7307	2.71705	0.839518	3.23644	0.00121029	0.0246152
K12603	20.5335	3.37134	1.00786	3.34505	0.000822681	0.0198849
K12614	233.985	3.90539	0.778516	5.01646	5.26e-07	0.00026649
K12813	18.6618	2.69582	0.803496	3.35512	0.00079332	0.0196189
K12815	14.5401	2.66765	0.879588	3.03284	0.00242267	0.0381442
K12819	12.4619	3.99384	1.30303	3.06504	0.0021764	0.0358739
K12831	12.1721	3.12018	0.996146	3.13225	0.0017347	0.0311019
K12833	8.53429	3.09031	1.01421	3.04701	0.00231133	0.0371823
K12837	26.1353	3.07088	0.928619	3.30693	0.000943232	0.0213503
K12838	12.3429	3.90194	1.25493	3.10928	0.00187545	0.0324493
K12842	5.3882	6.03053	1.77331	3.40073	0.000672072	0.0175757
K12852	29.1018	2.50144	0.700603	3.57041	0.000356421	0.0123782
K12854	71.6105	2.08083	0.71467	2.9116	0.00359587	0.0485846
K12856	166.991	2.07496	0.67782	3.06123	0.00220429	0.0361403
K12859	7.00871	4.0391	1.31409	3.07369	0.00211426	0.0353132
K12862	16.0922	2.43687	0.752926	3.23653	0.00120993	0.0246152
K12872	23.7396	3.14492	1.04417	3.01188	0.00259632	0.0395199
K12880	8.00029	2.9659	0.997572	2.97311	0.00294794	0.0424539
K12881	29.6954	2.41077	0.829347	2.90683	0.00365107	0.0489865
K12892	5.54019	5.16685	1.47009	3.51466	0.000440314	0.0140259
K12896	16.6933	3.17028	0.976967	3.24502	0.00117441	0.024151
K12897	13.9406	3.91115	1.31494	2.9744	0.00293559	0.0424539
K12949	12.776	2.64115	0.911305	2.8982	0.00375306	0.0496842
K13100	12.8797	3.09861	1.03491	2.99409	0.00275264	0.0409973
K13117	11.7086	4.62619	1.23487	3.74628	0.000179474	0.00770776
K13129	1.5252	22.2344	6.3181	3.51916	0.000432915	0.0139286
K13130	8.73637	24.9651	6.31797	3.95144	7.77e-05	0.0048213
K13158	19.8106	3.53573	1.15505	3.0611	0.00220523	0.0361403
K13170	5.11248	24.6617	6.31799	3.90341	9.48e-05	0.00545844
K13177	16.5642	3.29911	0.752281	4.38548	1.16e-05	0.00163728
K13178	51.3636	4.04858	0.981708	4.12402	3.72e-05	0.00331643
K13201	57.8273	2.91984	0.870465	3.35435	0.000795529	0.0196231
K13244	25.8141	2.4832	0.795612	3.12111	0.00180168	0.0317439
K13338	9.5312	3.85874	1.33113	2.89885	0.00374532	0.0496842
K13342	59.5051	2.08768	0.720586	2.8972	0.00376505	0.0496842
K13431	21.0099	2.9545	0.930961	3.1736	0.00150561	0.0283999
K13684	24.4626	-9.04492	2.90965	-3.10859	0.00187983	0.0324667
K13780	64.6872	5.18431	1.23302	4.20456	2.62e-05	0.00279611
K13811	47.1005	2.80202	0.587433	4.76995	1.84e-06	0.000533253
K13823	182	30	6.31795	4.74838	2.05e-06	0.000533253
K13866	15.5294	4.65349	1.03485	4.49679	6.9e-06	0.00120665
K13869	11.6041	5.01286	1.26747	3.955	7.65e-05	0.00478093
K13887	41.5542	3.10719	0.755667	4.11185	3.93e-05	0.00337565
K13907	12.4766	4.41648	1.24569	3.54541	0.000392005	0.0131513
K13979	1416.69	-2.59324	0.769218	-3.37127	0.000748237	0.0188925
K14007	43.6363	4.08602	0.929558	4.39566	1.1e-05	0.00162168
K14016	10.8073	3.75302	1.0987	3.41588	0.000635764	0.017319
K14018	11.4359	5.22563	1.56214	3.34518	0.0008223	0.0198849
K14021	1.93999	30	5.5517	5.40375	6.53e-08	5.36e-05
K14074	64.1833	18.8091	6.30792	2.98182	0.00286539	0.0417483
K14158	12.9022	2.23409	0.677464	3.29773	0.0009747	0.0216359
K14163	42.7224	3.26636	0.937186	3.48529	0.000491607	0.0149339
K14165	81.275	2.83189	0.790456	3.58261	0.000340178	0.0119134
K14169	3.30739	17.6453	4.17694	4.22445	2.4e-05	0.00267935
K14206	32.2877	2.86037	0.626736	4.56392	5.02e-06	0.00100623
K14257	13.8042	5.43737	1.59228	3.41482	0.000638232	0.017319
K14298	10.6988	3.0358	0.908952	3.3399	0.000838097	0.020106
K14309	10.7694	7.30043	2.264	3.22458	0.00126159	0.0251795
K14325	14.0916	4.32641	1.48796	2.9076	0.00364212	0.0489865
K14326	39.4363	2.62972	0.776312	3.38745	0.000705459	0.0180492
K14343	2.98373	-11.0826	2.72795	-4.06261	4.85e-05	0.0037346
K14376	17.3121	3.68441	1.10844	3.32396	0.0008875	0.020732
K14386	5.02743	3.83156	1.32237	2.8975	0.00376155	0.0496842
K14388	10.6954	4.99323	1.09659	4.5534	5.28e-06	0.00101558
K14389	15.8421	3.12687	0.933002	3.3514	0.000804027	0.0196313
K14390	9.7927	2.53294	0.669556	3.78302	0.000154936	0.00732284
K14399	10.1849	4.36139	1.22472	3.56114	0.000369246	0.0126572
K14416	17.6022	4.06215	1.21826	3.3344	0.000854849	0.0203558
K14437	16.8976	4.78119	1.41039	3.38998	0.000698975	0.017931
K14445	47.7827	2.45468	0.736168	3.33439	0.000854858	0.0203558
K14501	2.71002	5.62133	1.58563	3.54518	0.000392352	0.0131513
K14536	13.367	3.7027	1.00406	3.68773	0.00022626	0.00888772
K14539	22.685	3.39356	1.0476	3.23935	0.00119801	0.024521
K14554	13.9393	2.822	0.849514	3.3219	0.000894075	0.0207843
K14556	13.5552	3.89316	1.05096	3.7044	0.000211894	0.00852895
K14640	84.3305	3.27762	0.894608	3.66375	0.000248545	0.00941341
K14677	7.67531	3.79589	1.00696	3.76963	0.000163487	0.0073493
K14688	17.0958	3.13366	0.762161	4.11155	3.93e-05	0.00337565
K14692	17.4511	3.19903	0.847601	3.77422	0.000160509	0.00732284
K14701	10.4222	6.50533	1.56829	4.14804	3.35e-05	0.00325854
K14704	20.6697	4.12288	1.02337	4.02872	5.61e-05	0.00399638
K14709	28.4003	4.80423	1.38015	3.48095	0.000499636	0.0151148
K14710	5.14715	-6.86642	2.33952	-2.93497	0.00333583	0.0459094
K14763	5.52872	12.1215	3.62919	3.34	0.000837788	0.020106
K14768	8.4495	4.15533	1.20354	3.45259	0.000555228	0.0160399
K14779	28.2004	2.26207	0.747341	3.02682	0.00247139	0.0387211
K14782	5.13794	10.1611	2.99346	3.39444	0.000687695	0.0179142
K14807	14.7315	3.62113	1.09984	3.29242	0.000993301	0.0217107
K14946	9.20074	3.6766	1.22946	2.99041	0.00278602	0.0411698
K14947	14.9839	4.86487	1.25548	3.87492	0.00010666	0.00577214
K14961	7.6601	3.55002	0.988559	3.59111	0.000329276	0.0116969
K14966	30.5649	3.10044	1.05252	2.94572	0.003222	0.0447913
K14972	12.0953	26.1839	6.30192	4.1549	3.25e-05	0.0032187
K15100	19.6954	2.54334	0.820079	3.10134	0.00192646	0.0329761
K15102	123.605	2.3146	0.611554	3.78479	0.000153841	0.00732284
K15111	5.04259	4.27707	1.31168	3.26076	0.00111112	0.0232393
K15113	10.8511	5.04168	1.28537	3.92237	8.77e-05	0.00520683
K15119	9.22214	3.79148	1.30833	2.89794	0.0037562	0.0496842
K15123	4.79156	6.57453	2.26924	2.89724	0.00376461	0.0496842
K15172	18.1035	3.33038	1.04321	3.19245	0.00141073	0.0271968
K15175	6.99583	6.54546	1.78735	3.6621	0.000250158	0.00943732
K15255	16.7355	2.61803	0.876057	2.98842	0.00280425	0.041249
K15278	3.85434	8.73332	2.93525	2.97532	0.0029268	0.0424034
K15348	8.05308	25.0697	6.31797	3.968	7.25e-05	0.00462105
K15430	5.86122	5.58578	1.61566	3.45727	0.000545672	0.0158113
K15501	8.84788	5.25684	1.60984	3.26543	0.00109296	0.0230073
K15687	15.0737	7.60757	2.06358	3.6866	0.000227274	0.00888772
K15718	28.5218	8.35349	2.70022	3.09363	0.00197722	0.0335464
K15731	25.4528	3.16685	0.923348	3.42974	0.00060415	0.0168329
K15910	49.2532	5.17955	0.958927	5.4014	6.61e-08	5.36e-05
K15977	131.553	2.16842	0.721228	3.00657	0.00264217	0.0400488
K16175	36.009	3.24065	1.10808	2.92455	0.00344953	0.0470701
K16194	4.28464	4.11104	1.27337	3.22847	0.00124455	0.0250309
K16196	18.3788	2.58228	0.702692	3.67484	0.000238002	0.00912834
K16302	30.3771	2.74608	0.871056	3.15259	0.0016183	0.0298811
K16311	3.50448	6.60802	1.988	3.32395	0.000887514	0.020732
K16343	23.7794	8.48717	1.54046	5.50949	3.6e-08	4.33e-05
K16452	5.03927	23.9645	6.31799	3.79306	0.000148804	0.00724539
K16529	5.16443	28.7163	6.31433	4.5478	5.42e-06	0.00102256
K16621	4.05843	30	6.31792	4.74839	2.05e-06	0.000533253
K16682	11.0318	6.71164	2.07506	3.23443	0.00121884	0.0246847
K16773	4.63662	25.4726	6.318	4.03175	5.54e-05	0.00397461
K16810	1.82178	24.8116	6.3047	3.93542	8.31e-05	0.00499347
K16819	8.29061	20.7622	6.3075	3.29168	0.00099592	0.0217107
K16944	22.7604	5.21439	1.69675	3.07316	0.00211806	0.0353132
K17043	13.0126	3.92107	1.02857	3.81215	0.000137766	0.0070122
K17086	71.8986	2.77675	0.687451	4.03919	5.36e-05	0.00397061
K17087	33.1337	3.47563	0.890686	3.9022	9.53e-05	0.00545844
K17254	140.765	-7.33756	2.22943	-3.29123	0.000997521	0.0217107
K17260	76.2355	3.51638	0.788132	4.46166	8.13e-06	0.00126846
K17261	108.574	2.32873	0.728965	3.19457	0.0014004	0.0271609
K17267	33.3228	2.70947	0.848483	3.19331	0.00140651	0.0271699
K17301	45.7659	2.74715	0.689833	3.98235	6.82e-05	0.00455871
K17338	9.56029	6.37388	1.87433	3.40062	0.000672333	0.0175757
K17414	1.79364	22.4914	6.31808	3.55985	0.000371072	0.0126586
K17418	2.80644	30	6.31792	4.7484	2.05e-06	0.000533253
K17470	81.6456	5.34611	1.42246	3.75836	0.000171032	0.00758215
K17499	26.7897	2.92502	0.826863	3.53748	0.000403957	0.0133542
K17503	3.06778	17.706	3.07774	5.75293	8.77e-09	1.41e-05
K17508	20.7588	3.378	0.798056	4.23279	2.31e-05	0.0026122
K17576	2.90399	23.9419	6.31803	3.78945	0.000150979	0.0072986
K17588	8.61983	9.28722	2.37923	3.90346	9.48e-05	0.00545844
K17608	17.7908	3.11733	1.04268	2.98973	0.00279223	0.0411947
K17609	39.0523	2.18891	0.564696	3.87627	0.000106072	0.00577214
K17800	9.33728	5.06035	1.50337	3.366	0.000762667	0.0190479
K17822	6.92944	4.26022	1.41728	3.0059	0.00264792	0.0400488
K17839	14.7424	3.02948	0.796089	3.80546	0.00014154	0.00709176
K17890	15.2736	2.34225	0.74597	3.13986	0.00169026	0.0306798
K17906	28.665	5.7182	1.71458	3.33503	0.000852889	0.0203558
K17908	9.69123	3.65135	1.07158	3.40744	0.000655743	0.0175717
K17921	4.50044	8.29568	2.59162	3.20097	0.00136968	0.0266727
K18123	23.6586	2.82539	0.845193	3.34289	0.000829096	0.0199897
K18283	26.9965	3.81099	1.13204	3.3665	0.000761297	0.0190479
K18416	5.86885	6.44908	1.94988	3.30743	0.000941569	0.0213503
K18418	3.40156	30	2.91163	10.3035	6.79e-25	6.54e-21
K18441	3.89469	4.19032	1.35969	3.08182	0.00205737	0.0346076
K18442	24.851	3.04281	1.00934	3.01467	0.00257263	0.0395199
K18584	72.0425	2.15416	0.570425	3.77642	0.000159101	0.00732284
K18596	4.9966	7.68976	2.33208	3.29738	0.000975917	0.0216359
K18643	12.9739	10.7449	3.20603	3.35148	0.000803799	0.0196313
K18663	23.3486	3.5941	0.805104	4.46415	8.04e-06	0.00126846
K18669	17.042	3.14294	0.739365	4.25086	2.13e-05	0.00246818
K18728	14.9836	25.7596	6.31796	4.07719	4.56e-05	0.00359428
K18729	8.3785	24.372	2.63187	9.26032	2.04e-20	9.8e-17
K19036	8.33517	3.12867	1.07754	2.90353	0.0036898	0.0493684
K19176	11.4742	3.0256	0.889407	3.40182	0.000669392	0.0175757
K19421	346.513	-3.81179	0.815281	-4.67543	2.93e-06	0.000688279
K19424	38.4582	-2.58756	0.824644	-3.13779	0.00170227	0.0308397
K19527	22.9974	7.30031	1.67296	4.36372	1.28e-05	0.00173252
K19550	5.73017	-2.27086	0.659316	-3.44427	0.000572598	0.0163454
K19584	10.6737	2.89179	0.778096	3.71649	0.000202007	0.00826939
K19603	31.9976	2.44048	0.734839	3.3211	0.000896622	0.0207843
K19640	59.8636	-3.99011	1.12638	-3.54242	0.000396476	0.0132434
K19707	41.3846	-2.7394	0.847485	-3.23239	0.0012276	0.0247579
K19801	12.3778	3.30049	1.09536	3.01316	0.00258542	0.0395199
K19915	10.1109	30	6.31746	4.74874	2.05e-06	0.000533253
K20069	6.12953	4.6105	1.39963	3.29407	0.000987464	0.0216881
K20095	13.5622	2.65866	0.818625	3.24771	0.00116338	0.0241201
K20099	8.14748	7.51013	2.53947	2.95736	0.00310289	0.0437039
K20175	2.97525	5.02209	1.43228	3.50636	0.00045428	0.0141821
K20181	7.69289	5.67162	1.5028	3.77404	0.000160626	0.00732284
K20182	5.72068	4.46792	1.30179	3.43214	0.000598834	0.0167515
K20303	4.18977	6.18851	1.9484	3.1762	0.00149219	0.0282068
K20353	40.7314	9.90374	2.68567	3.68762	0.000226364	0.00888772
K20367	11.2922	3.1947	1.02583	3.11427	0.001844	0.0320782
K20369	18.9591	5.07998	1.29017	3.93744	8.24e-05	0.00499347
K20456	21.6295	3.79067	1.15011	3.29593	0.00098098	0.0216508
K20644	17.9099	6.55138	1.75517	3.73262	0.000189495	0.00799321
K20656	21.6577	6.47087	1.41423	4.57553	4.75e-06	0.00100574
K20876	4.96506	3.4598	1.13534	3.04736	0.00230863	0.0371823
K20877	12.9909	2.91498	0.869701	3.35171	0.000803146	0.0196313
K20944	4.31524	-4.24968	1.44367	-2.94367	0.00324349	0.0449601
K21436	41.0379	10.6413	2.42239	4.39292	1.12e-05	0.00162168
K21464	100.844	-3.57983	1.05902	-3.38032	0.00072402	0.0184261
K21684	98.918	2.95783	0.867224	3.41069	0.000647981	0.0174352
K21752	2.51677	11.5766	2.86995	4.03374	5.49e-05	0.00397061
K21891	3.11914	6.41255	2.05225	3.12464	0.00178024	0.0314815
K21971	6.50116	2.82592	0.975099	2.89808	0.0037545	0.0496842
K22046	6.83096	6.39572	2.14673	2.97929	0.00288916	0.0419568
K22270	129.458	3.2384	0.895499	3.6163	0.000298839	0.010727
K22285	11.3419	3.80725	1.22074	3.11882	0.00181577	0.0317896
K22372	14.8772	2.23075	0.739508	3.01652	0.0025569	0.0395199
K22378	3.4594	6.78028	2.06346	3.28588	0.00101663	0.0220271
K22390	52.7358	3.30915	0.87098	3.79934	0.00014508	0.00719757
K22414	6.02896	30	6.31798	4.74835	2.05e-06	0.000533253
K22503	49.5047	2.70663	0.631894	4.28336	1.84e-05	0.00222996
K22538	6.48267	4.16435	1.23735	3.36555	0.000763921	0.0190479
K22543	2.29271	24.4407	6.30795	3.87459	0.000106803	0.00577214
K22611	14.608	4.48415	1.19116	3.76452	0.000166872	0.00746657
K22705	21.1134	3.33446	1.03582	3.21915	0.00128573	0.0255026
K22804	4.80618	4.73609	1.58435	2.98929	0.00279627	0.0411947
K22817	2.79417	24.06	6.31803	3.80815	0.000140012	0.00708903
K22886	12.8538	2.66182	0.879328	3.02711	0.00246906	0.0387211
K22935	19.0953	-4.74394	1.45263	-3.26576	0.0010917	0.0230073
K23297	2.79315	23.6844	6.31803	3.74871	0.000177749	0.00766791
K23362	1.85414	21.1356	5.01448	4.21492	2.5e-05	0.00276292
K23425	24.2372	4.17456	0.888542	4.69821	2.62e-06	0.000640457
K23500	3.70991	6.30707	2.06918	3.04811	0.00230288	0.0371823
K23554	3.13392	24.292	6.30456	3.85308	0.000116641	0.00609832
K23677	11.0713	3.79727	1.26698	2.9971	0.0027256	0.0408153
K23741	12.5819	5.21653	1.41563	3.68496	0.000228739	0.00890878
K23790	6.25973	4.03718	1.36665	2.95406	0.00313618	0.0438799
K24006	22.3475	4.21798	1.20392	3.50354	0.000459111	0.0142429
K24069	12.3915	7.73607	1.98045	3.90622	9.38e-05	0.00545844
K24070	9.50658	3.87758	0.960839	4.03562	5.45e-05	0.00397061
K24420	35.3188	2.77651	0.847829	3.27485	0.0010572	0.0227015
K24427	25.0345	6.95728	1.52276	4.56886	4.9e-06	0.00100574
K24434	69.7369	5.12783	1.32052	3.88318	0.000103098	0.00575774
K24485	41.1667	7.32812	1.54256	4.75062	2.03e-06	0.000533253
K24523	24.4443	4.93167	1.10457	4.46479	8.01e-06	0.00126846
K24641	2.18409	22.1594	6.31805	3.50731	0.000452657	0.0141821
K24736	55.4543	2.13799	0.719463	2.97164	0.00296209	0.0425303
K24744	9.80327	5.51581	1.54903	3.56081	0.000369717	0.0126572
K24925	11.5886	4.9958	1.5884	3.14518	0.00165982	0.0303459
K24979	40.366	6.02	1.34961	4.46055	8.18e-06	0.00126846
K24990	30.0616	5.80578	1.47199	3.94417	8.01e-05	0.0049067
K25010	11.5726	-4.34349	1.35903	-3.19601	0.0013934	0.0270798
K25091	9.02772	9.412	2.59229	3.63077	0.000282582	0.0103363
K25130	24.4718	-3.24889	0.841715	-3.85985	0.000113456	0.00596421
K25388	4.19395	6.97124	2.14703	3.24692	0.00116659	0.0241346
K25442	11.8641	6.77687	2.16426	3.13127	0.00174053	0.0311133
K25591	1.5252	22.2344	6.3181	3.51916	0.000432915	0.0139286
K25592	2.23613	21.751	5.39163	4.03421	5.48e-05	0.00397061
K25668	8.26623	18.4142	4.49752	4.09431	4.23e-05	0.00342035
		Day1-Day10
gene	baseMean	log2FoldChange	lfcSE	stat	pvalue	padj
K00181	3.35226	-11.5948	0.632606	-18.3286	4.9e-75	8.93e-73
K00902	2.71801	-2.47494	0.451203	-5.48521	4.13e-08	5.55e-06
K02514	2.63201	-2.85228	0.700914	-4.06938	4.71e-05	0.00388139
K02607	2.9941	-13.905	0.722052	-19.2576	1.22e-82	2.9e-80
K03419	7.06526	-13.6499	0.722052	-18.9043	1.05e-79	2.15e-77
K03898	2.47693	-20.9904	0.722052	-29.0705	8.47e-186	3.09e-183
K04194	4.80744	-21.3903	0.722052	-29.6243	7.27e-193	3.71e-190
K04347	2.18409	-22.7677	0.722052	-31.532	3.17e-218	3.59e-215
K04541	2.44033	-21.3641	0.722052	-29.588	2.13e-192	1.04e-189
K04570	8.43133	-23.4521	0.722052	-32.4797	2.06e-231	4.21e-228
K04829	1.44328	-13.4906	0.722052	-18.6836	6.73e-78	1.32e-75
K04965	3.7581	-21.0276	0.722052	-29.122	1.89e-186	7.14e-184
K06279	2.13823	-11.765	0.611444	-19.2414	1.67e-82	3.87e-80
K07201	8.0611	-2.05191	0.472242	-4.34505	1.39e-05	0.00131636
K07970	2.04023	-17.7248	0.719384	-24.6389	4.84e-134	1.55e-131
K08019	2.81315	-13.4544	0.591732	-22.7372	1.92e-114	5.6e-112
K08051	4.2115	-12.866	0.687467	-18.715	3.73e-78	7.47e-76
K08507	2.12125	-12.2633	0.722052	-16.984	1.08e-64	1.72e-62
K08544	7.73146	-2.38781	0.527985	-4.52251	6.11e-06	0.000623954
K08702	4.53506	-12.565	0.722052	-17.4018	8e-68	1.34e-65
K08707	2.85751	-13.7913	0.722052	-19.1001	2.52e-81	5.59e-79
K09035	1.88708	-17.9566	0.719347	-24.9624	1.57e-137	5.33e-135
K09171	8.48749	-15.4885	0.722052	-21.4507	4.5e-102	1.24e-99
K09326	2.34778	-15.2857	0.720298	-21.2214	6.07e-100	1.63e-97
K09427	1.57401	-19.9708	0.722052	-27.6584	2.21e-168	7.78e-166
K09662	12.7532	-15.289	0.722052	-21.1744	1.64e-99	4.3e-97
K09663	8.13849	-23.3492	0.722052	-32.3372	2.1e-229	3.57e-226
K10100	4.17296	-21.192	0.722052	-29.3497	2.41e-189	9.48e-187
K10308	2.89495	-13.7402	0.722052	-19.0294	9.74e-81	2.03e-78
K10425	2.31831	-21.5104	0.722052	-29.7906	5.17e-195	3.1e-192
K10453	4.78304	-21.4384	0.722052	-29.6909	1.01e-193	5.41e-191
K10475	3.92125	-20.6977	0.659462	-31.3858	3.16e-216	3.23e-213
K10485	5.43673	-2.64647	0.5124	-5.16485	2.41e-07	3e-05
K10639	1.87905	-21.8543	0.722052	-30.267	3.12e-201	2.28e-198
K10790	9.64633	-16.4252	0.72189	-22.7531	1.34e-114	4.02e-112
K11668	1.96849	-12.6495	0.679347	-18.62	2.21e-77	4.26e-75
K11980	3.3287	-11.9687	0.531262	-22.5288	2.17e-112	6.15e-110
K12013	1.96446	-21.9704	0.722052	-30.4277	2.36e-203	1.86e-200
K12505	2.24127	-12.3208	0.722052	-17.0636	2.77e-65	4.49e-63
K13129	1.5252	-21.357	0.722052	-29.5781	2.86e-192	1.27e-189
K13130	8.73637	-23.5557	0.722052	-32.6232	1.92e-233	4.9e-230
K13170	5.11248	-22.2192	0.722052	-30.7722	6.16e-208	5.24e-205
K13823	182	-26.571	0.722052	-36.7993	1.89e-296	9.67e-293
K14021	1.93999	2.64147	0.637354	4.14443	3.41e-05	0.00297277
K14074	64.1833	-17.7468	0.722052	-24.5783	2.16e-133	6.67e-131
K14343	2.98373	-15.7609	0.320194	-49.223	0	0
K14721	5.04512	-2.64784	0.448449	-5.90443	3.54e-09	4.95e-07
K15146	2.87221	-15.2571	0.616646	-24.742	3.78e-135	1.25e-132
K15348	8.05308	-23.2241	0.722052	-32.164	5.62e-227	8.2e-224
K15630	4.76616	-13.2504	0.722052	-18.3511	3.24e-75	6.01e-73
K16452	5.03927	-22.3338	0.722052	-30.931	4.58e-210	4.25e-207
K16773	4.63662	-21.2076	0.722052	-29.3712	1.28e-189	5.23e-187
K17345	3.27183	-12.7658	0.722052	-17.6799	5.99e-70	1.04e-67
K17401	2.17945	-12.8095	0.722052	-17.7404	2.05e-70	3.66e-68
K17414	1.79364	-21.6294	0.722052	-29.9554	3.74e-197	2.54e-194
K17492	4.25869	-13.377	0.722052	-18.5264	1.26e-76	2.39e-74
K17576	2.90399	-21.4555	0.722052	-29.7146	4.98e-194	2.82e-191
K17885	2.01662	-12.7801	0.722052	-17.6997	4.21e-70	7.42e-68
K18418	3.40156	2.6225	0.338031	7.75818	8.62e-15	1.31e-12
K18728	14.9836	-24.1034	0.722052	-33.3818	2.52e-244	8.59e-241
K18729	8.3785	2.06161	0.305016	6.75903	1.39e-11	2.09e-09
K19619	5.65821	-13.876	0.722052	-19.2174	2.65e-82	6.01e-80
K19878	7.54329	-15.1097	0.722052	-20.9261	3.1e-97	7.91e-95
K20822	2.08452	-13.7688	0.722052	-19.0689	4.57e-81	9.73e-79
K21873	7.0213	-13.7844	0.722052	-19.0905	3.03e-81	6.57e-79
K22371	4.01744	-12.4162	0.722052	-17.1957	2.86e-66	4.71e-64
K22543	2.29271	-2.52414	0.720408	-3.50376	0.000458738	0.0285592
K22657	3.16726	-11.7158	0.722052	-16.2256	3.32e-59	5.22e-57
K22817	2.79417	-21.2298	0.722052	-29.4021	5.16e-190	2.2e-187
K23297	2.79315	-21.5513	0.722052	-29.8472	9.54e-196	6.09e-193
K23554	3.13392	-2.76644	0.719861	-3.84302	0.000121528	0.00954465
K24317	4.60985	-14.0797	0.722052	-19.4996	1.11e-84	2.69e-82
K24626	3.49676	-10.841	0.695487	-15.5877	8.83e-55	1.37e-52
K24641	2.18409	-22.7677	0.722052	-31.532	3.17e-218	3.59e-215
K25304	1.67427	-12.7065	0.722052	-17.5978	2.56e-69	4.36e-67
K25591	1.5252	-21.357	0.722052	-29.5781	2.86e-192	1.27e-189
K25605	2.74294	-14.5002	0.722052	-20.0819	1.06e-89	2.65e-87
		interaction condition and day
gene	baseMean	log2FoldChange	lfcSE	stat	pvalue	padj
K00181	3.35226	10.8315	0.890135	12.1683	4.58e-34	1.87e-31
K00771	10.4787	-3.72909	0.504604	-7.39013	1.47e-13	2.88e-11
K00976	3.96869	-3.43199	0.827009	-4.14988	3.33e-05	0.00313778
K02514	2.63201	-4.81106	0.990164	-4.85885	1.18e-06	0.000133132
K02607	2.9941	7.1303	1.01861	7.00005	2.56e-12	4.33e-10
K03132	6.1804	-3.94516	0.639158	-6.17243	6.72e-10	9.42e-08
K03419	7.06526	7.04518	1.01801	6.92054	4.5e-12	7.48e-10
K04163	2.55166	-21.2163	1.01904	-20.82	2.85e-96	2.8e-93
K04358	4.43186	-4.81351	0.968995	-4.96753	6.78e-07	8.01e-05
K04405	5.31357	-4.43747	0.82258	-5.39457	6.87e-08	9.11e-06
K04684	3.43493	-21.4948	0.702677	-30.5898	1.67e-205	8.2e-202
K04829	1.44328	6.65319	1.01908	6.52863	6.64e-11	1.05e-08
K06170	2.39816	-2.37213	0.676343	-3.50729	0.000452687	0.0259699
K06279	2.13823	11.3118	0.85956	13.1601	1.49e-39	6.96e-37
K06578	8.16677	-21.9039	1.01842	-21.5078	1.32e-102	1.84e-99
K07970	2.04023	-8.41538	1.01719	-8.27318	1.3e-16	3.05e-14
K08019	2.81315	9.53025	0.832961	11.4414	2.6e-30	9.8e-28
K08051	4.2115	10.1386	0.968534	10.468	1.21e-25	4.24e-23
K08507	2.12125	10.5991	1.01736	10.4182	2.05e-25	6.93e-23
K08702	4.53506	8.64976	1.0179	8.49768	1.93e-17	4.74e-15
K08707	2.85751	7.87911	1.01803	7.73959	9.97e-15	2.08e-12
K09035	1.88708	-8.89864	1.01716	-8.74849	2.16e-18	5.73e-16
K09171	8.48749	6.6312	1.01898	6.5077	7.63e-11	1.15e-08
K09326	2.34778	13.1169	1.01648	12.9042	4.26e-38	1.9e-35
K09662	12.7532	6.70839	1.01854	6.58628	4.51e-11	7.25e-09
K09855	2.17814	-6.63557	1.01821	-6.5169	7.18e-11	1.12e-08
K10151	3.78895	-21.4186	0.971903	-22.0378	1.25e-107	2.04e-104
K10308	2.89495	9.24744	1.01788	9.08496	1.04e-19	2.99e-17
K10475	3.92125	18.3796	0.931747	19.726	1.29e-86	9.04e-84
K10572	2.84989	-20.0816	0.827987	-24.2535	6.07e-130	1.98e-126
K10790	9.64633	-7.95262	1.01895	-7.80473	5.96e-15	1.27e-12
K10903	3.18562	-5.12652	1.01775	-5.03713	4.73e-07	5.76e-05
K10990	3.36902	-5.35653	1.01642	-5.26998	1.36e-07	1.74e-05
K10994	2.51639	-20.0786	1.01698	-19.7433	9.15e-87	6.91e-84
K11137	2.57864	-6.0863	0.861984	-7.06081	1.66e-12	2.9e-10
K11668	1.96849	11.8537	0.956617	12.3912	2.92e-35	1.24e-32
K11973	19.8786	-21.725	1.01508	-21.4023	1.27e-101	1.56e-98
K11980	3.3287	10.2933	0.746093	13.7963	2.68e-43	1.32e-40
K12404	5.02945	-2.15358	0.584001	-3.68762	0.00022636	0.0153144
K12478	5.34287	-2.01602	0.372982	-5.40515	6.48e-08	8.7e-06
K12505	2.24127	9.50251	1.01782	9.33617	9.99e-21	2.97e-18
K12865	5.94549	-5.96066	1.01812	-5.85455	4.78e-09	6.61e-07
K13516	3.32393	-2.32977	0.602405	-3.86745	0.000109981	0.00867628
K13862	2.18848	-3.92293	1.01824	-3.85266	0.000116842	0.00909699
K14021	1.93999	-2.93675	0.895653	-3.27889	0.00104215	0.0464705
K14074	64.1833	8.44442	1.01806	8.29465	1.09e-16	2.61e-14
K14169	3.30739	-4.87264	0.672777	-7.24258	4.4e-13	8.15e-11
K14343	2.98373	14.8947	0.447364	33.2943	4.67e-243	4.58e-239
K14763	5.52872	-2.99387	0.588094	-5.0908	3.57e-07	4.43e-05
K14782	5.13794	-3.52395	0.487653	-7.22635	4.96e-13	9.01e-11
K14784	3.26606	-2.54745	0.686913	-3.70854	0.000208455	0.0147118
K14972	12.0953	-8.10897	1.01543	-7.98571	1.4e-15	3.11e-13
K15141	2.38108	-5.44362	1.01713	-5.35194	8.7e-08	1.14e-05
K15146	2.87221	13.3435	0.869241	15.3507	3.5e-53	1.81e-50
K15414	2.75133	-2.66508	0.700566	-3.80419	0.00014227	0.0108191
K15630	4.76616	6.63115	1.01819	6.51268	7.38e-11	1.13e-08
K16273	5.97946	-2.91051	0.741846	-3.92334	8.73e-05	0.00738549
K16529	5.16443	-21.0427	1.01864	-20.6576	8.34e-95	7.44e-92
K16573	3.9434	-4.99544	1.01592	-4.91715	8.78e-07	0.000101349
K16621	4.05843	-19.2981	1.01901	-18.9381	5.54e-80	3.4e-77
K16810	1.82178	-19.8911	1.01756	-19.5478	4.31e-85	2.82e-82
K16819	8.29061	-6.99282	1.01799	-6.86923	6.45e-12	1.06e-09
K17345	3.27183	9.80916	1.01767	9.63889	5.48e-22	1.73e-19
K17401	2.17945	11.4335	1.01731	11.2389	2.63e-29	9.54e-27
K17418	2.80644	-22.5936	1.01901	-22.1721	6.38e-109	1.25e-105
K17492	4.25869	8.90016	1.01796	8.74314	2.27e-18	5.85e-16
K17503	3.06778	-2.8473	0.500108	-5.69337	1.25e-08	1.7e-06
K17885	2.01662	11.8462	1.01727	11.6451	2.43e-31	9.54e-29
K18418	3.40156	-3.33794	0.472745	-7.06076	1.66e-12	2.9e-10
K18729	8.3785	-2.70656	0.424816	-6.37113	1.88e-10	2.75e-08
K19307	1.98821	-7.88004	1.01902	-7.73295	1.05e-14	2.15e-12
K19619	5.65821	7.45088	1.01802	7.31901	2.5e-13	4.71e-11
K19730	7.14487	-2.42265	0.537976	-4.50327	6.69e-06	0.000690995
K19878	7.54329	8.12354	1.01813	7.97887	1.48e-15	3.22e-13
K19915	10.1109	-20.8492	1.01901	-20.4603	4.86e-93	3.97e-90
K20106	2.30212	-5.43982	1.01808	-5.34323	9.13e-08	1.18e-05
K20818	2.00551	-5.24289	1.01811	-5.14963	2.61e-07	3.28e-05
K20822	2.08452	7.47132	1.01858	7.33504	2.22e-13	4.26e-11
K21198	3.06797	-2.57285	0.660216	-3.89698	9.74e-05	0.00784561
K21873	7.0213	7.16359	1.01802	7.0368	1.97e-12	3.39e-10
K22371	4.01744	9.57115	1.01772	9.40447	5.23e-21	1.6e-18
K22414	6.02896	-21.3419	1.01906	-20.9426	2.19e-97	2.39e-94
K22543	2.29271	-18.91	1.01791	-18.5773	4.9e-77	2.67e-74
K22657	3.16726	10.5043	1.01714	10.3273	5.31e-25	1.74e-22
K23314	2.32187	-2.78281	0.607161	-4.58331	4.58e-06	0.000482772
K23362	1.85414	-6.5133	0.807128	-8.06973	7.05e-16	1.61e-13
K23554	3.13392	-19.1222	1.01752	-18.793	8.62e-79	4.98e-76
K23611	2.20353	-6.48055	1.01538	-6.3824	1.74e-10	2.59e-08
K24174	3.12	-6.18235	0.99917	-6.18749	6.11e-10	8.71e-08
K24317	4.60985	7.79792	1.01803	7.65978	1.86e-14	3.73e-12
K24626	3.49676	8.39252	0.979957	8.56418	1.09e-17	2.74e-15
K25091	9.02772	-2.1345	0.424457	-5.02878	4.94e-07	5.91e-05
K25304	1.67427	9.05895	1.01801	8.89868	5.65e-19	1.58e-16
K25592	2.23613	-19.6941	0.871637	-22.5944	4.92e-113	1.21e-109
K25605	2.74294	6.30506	1.01907	6.18707	6.13e-10	8.71e-08
K25668	8.26623	-6.38689	0.727005	-8.7852	1.56e-18	4.25e-16
