# Supplementary material for: A metatranscriptomic exploration of fungal and bacterial contributions to allochthonous leaf litter decomposition in the streambed
Source: PeerJ. 2025 Apr 25;13:e19120. doi: 10.7717/peerj.19120 (PMC12036579; doi:10.7717/peerj.19120)
Supplement: Supplemental Information 4 — Pathways Enrichment of Significantly expressed KOs for bacteria and fungi. gene set enrichment of KOs was performed with kegg.gsets from gage R package on KOs which are significant with increased organic matter (control vs treatment). [file peerj-13-19120-s004.xlsx]

## Sheet: Bacteria
Bacteria
Pathways	KOs	P-value
ko00010 Glycolysis / Gluconeogenesis	K15779	0
ko00030 Pentose phosphate pathway	K07404, K15779	0
ko00040 Pentose and glucuronate interconversions	K03331, K22935	0
ko00051 Fructose and mannose metabolism	K00863, K01218	0
ko00052 Galactose metabolism	K12309, K15779	0
ko00120 Primary bile acid biosynthesis	K01796	0
ko00130 Ubiquinone and other terpenoid-quinone biosynthesis	K00815	0
ko00195 Photosynthesis	K02695	0
ko00196 Photosynthesis - antenna proteins	K08908, K08911	0
ko00220 Arginine biosynthesis	K05597, K14677	0
ko00230 Purine metabolism	K13811, K15779	0
ko00250 Alanine, aspartate and glutamate metabolism	K05597	0
ko00261 Monobactam biosynthesis	K13811	0
ko00270 Cysteine and methionine metabolism	K00815	0
ko00350 Tyrosine metabolism	K00815	0
ko00360 Phenylalanine metabolism	K00815	0
ko00362 Benzoate degradation	K22270	0
ko00400 Phenylalanine, tyrosine and tryptophan biosynthesis	K00815	0
ko00401 Novobiocin biosynthesis	K00815	0
ko00440 Phosphonate and phosphinate metabolism	K00968	0
ko00450 Selenocompound metabolism	K13811	0
ko00470 D-Amino acid metabolism	K05597	0
ko00500 Starch and sucrose metabolism	K00693, K00696, K01194, K15779	0
ko00510 N-Glycan biosynthesis	K01230, K07151	0
ko00511 Other glycan degradation	K01201, K12309, K12373	0
ko00512 Mucin type O-glycan biosynthesis	K09663	0
ko00513 Various types of N-glycan biosynthesis	K01230, K07151, K12373	0
ko00520 Amino sugar and nucleotide sugar metabolism	K00972, K01787, K12373, K15779	0
ko00531 Glycosaminoglycan degradation	K12309, K12373	0
ko00550 Peptidoglycan biosynthesis	K12555	0
ko00561 Glycerolipid metabolism	K00863	0
ko00562 Inositol phosphate metabolism	K00921, K10572, K20279	0
ko00564 Glycerophospholipid metabolism	K00113, K00894, K00968, K05929, K06128, K16343	0
ko00565 Ether lipid metabolism	K16343, K20656	0
ko00590 Arachidonic acid metabolism	K16343	0
ko00591 Linoleic acid metabolism	K16343	0
ko00592 alpha-Linolenic acid metabolism	K16343	0
ko00600 Sphingolipid metabolism	K01201, K04712, K12309, K12373	0
ko00601 Glycosphingolipid biosynthesis - lacto and neolacto series	K07820	0
ko00603 Glycosphingolipid biosynthesis - globo and isoglobo series	K12373	0
ko00604 Glycosphingolipid biosynthesis - ganglio series	K12309, K12373	0
ko00630 Glyoxylate and dicarboxylate metabolism	K01608, K01816	0
ko00680 Methane metabolism	K00863	0
ko00760 Nicotinate and nicotinamide metabolism	K03742, K06210	0
ko00790 Folate biosynthesis	K01930	0
ko00791 Atrazine degradation	K08710	0
ko00860 Porphyrin metabolism	K14163	0
ko00920 Sulfur metabolism	K13811	0
ko00950 Isoquinoline alkaloid biosynthesis	K00815	0
ko00960 Tropane, piperidine and pyridine alkaloid biosynthesis	K00815	0
ko00970 Aminoacyl-tRNA biosynthesis	K14163	0
ko01100 Metabolic pathways	K00693, K00696, K00815, K00863, K00894, K00921, K00968, K00972, K01194, K01201, K01218, K01230, K01608, K01787, K01796, K01816, K01930, K02695, K03331, K03742, K04712, K05597, K06210, K07151, K07404, K07820, K08710, K08908, K08911, K09663, K10572, K12309, K12373, K12555, K13811, K14163, K14677, K15779, K16343, K20279, K20656, K22935	0
ko01110 Biosynthesis of secondary metabolites	K00113, K00693, K00696, K00815, K01194, K05597, K07404, K13811, K14163, K14677, K15779, K16343	0
ko01120 Microbial metabolism in diverse environments	K00863, K07404, K08710, K13811, K14163, K15779, K22270	0
ko01200 Carbon metabolism	K00863, K07404	0
ko01210 2-Oxocarboxylic acid metabolism	K14677	0
ko01230 Biosynthesis of amino acids	K14677	0
ko01240 Biosynthesis of cofactors	K01930, K06210, K14163	0
ko01250 Biosynthesis of nucleotide sugars	K00972, K15779	0
ko01501 beta-Lactam resistance	K12555	0
ko01521 EGFR tyrosine kinase inhibitor resistance	K03083, K04366, K06279	0
ko01522 Endocrine resistance	K04366, K05725, K06279, K11256, K17454	0
ko01523 Antifolate resistance	K01930	0
ko02010 ABC transporters	K05773, K10556	0
ko02020 Two-component system	K05597, K19610	0
ko02024 Quorum sensing	K01218, K10556	0
ko02026 Biofilm formation - Escherichia coli	K21087	0
ko03008 Ribosome biogenesis in eukaryotes	K14556, K14572	0
ko03010 Ribosome	K02943	0
ko03018 RNA degradation	K12614	0
ko03022 Basal transcription factors	K03135	0
ko03030 DNA replication	K02540	0
ko03060 Protein export	K10956	0
ko03250 Viral life cycle - HIV-1	K12196	0
ko03320 PPAR signaling pathway	K08745	0
ko03410 Base excision repair	K03648, K10776	0
ko03440 Homologous recombination	K04482	0
ko03460 Fanconi anemia pathway	K04482, K10990	0
ko04010 MAPK signaling pathway	K04347, K04348, K04366, K04373, K04406, K04412, K04437, K04461	0
ko04012 ErbB signaling pathway	K03083, K04366, K05725, K06279	0
ko04013 MAPK signaling pathway - fly	K04461, K05759, K06279	0
ko04014 Ras signaling pathway	K04347, K04366, K04539, K04541, K06279, K16343	0
ko04015 Rap1 signaling pathway	K04366, K05759, K06271	0
ko04020 Calcium signaling pathway	K04194, K04348, K05850, K09565	0
ko04022 cGMP-PKG signaling pathway	K03898, K04348, K04366, K05850, K06270, K09565	0
ko04024 cAMP signaling pathway	K04366, K05850, K06270	0
ko04062 Chemokine signaling pathway	K03083, K04347, K04366, K04539, K04541, K05725, K05760, K06279	0
ko04068 FoxO signaling pathway	K04366, K06631, K07200, K08861	0
ko04070 Phosphatidylinositol signaling system	K00921, K10572, K20279	0
ko04071 Sphingolipid signaling pathway	K03898, K04366, K04712	0
ko04072 Phospholipase D signaling pathway	K04366, K06279	0
ko04080 Neuroactive ligand-receptor interaction	K01315, K03898, K04194, K08362	0
ko04110 Cell cycle	K02216, K02540, K03083, K03094, K03363, K06631, K17454	0
ko04111 Cell cycle - yeast	K02216, K02540, K03094, K03363, K18669	0
ko04113 Meiosis - yeast	K02216, K02540, K03363	0
ko04114 Oocyte meiosis	K03094, K03363, K04348, K04373, K06631	0
ko04115 p53 signaling pathway	K02216	0
ko04120 Ubiquitin mediated proteolysis	K03094, K03363, K10580	0
ko04122 Sulfur relay system	K14169	0
ko04130 SNARE interactions in vesicular transport	K08510	0
ko04136 Autophagy - other	K08269, K17906	0
ko04137 Mitophagy - animal	K08860, K11839, K17454	0
ko04138 Autophagy - yeast	K05758, K08269, K16196, K17260, K17906, K20181	0
ko04139 Mitophagy - yeast	K08269	0
ko04140 Autophagy - animal	K04366, K07901, K08269, K08803, K08860, K16196, K17906, K20181	0
ko04141 Protein processing in endoplasmic reticulum	K01230, K03094, K07151, K08056, K08860, K10100, K10956, K14007	0
ko04142 Lysosome	K01201, K01373, K12309, K12373, K12396, K25442	0
ko04144 Endocytosis	K05758, K07901, K11839, K12196, K17260	0
ko04145 Phagosome	K00921, K10413, K10956	0
ko04146 Peroxisome	K01796	0
ko04150 mTOR signaling pathway	K03083, K04366, K04373, K08269	0
ko04151 PI3K-Akt signaling pathway	K00693, K03083, K04347, K04366, K04539, K04541, K05725	0
ko04152 AMPK signaling pathway	K00693, K07200, K07901	0
ko04210 Apoptosis	K01373, K04366, K08860	0
ko04211 Longevity regulating pathway	K07200	0
ko04212 Longevity regulating pathway - worm	K08269	0
ko04213 Longevity regulating pathway - multiple species	K07200	0
ko04214 Apoptosis - fly	K04412, K08860	0
ko04217 Necroptosis	K12196	0
ko04218 Cellular senescence	K02216, K04348, K04366, K10994, K17454	0
ko04261 Adrenergic signaling in cardiomyocytes	K05850, K09052	0
ko04270 Vascular smooth muscle contraction	K04366, K06270, K16343	0
ko04310 Wnt signaling pathway	K03083, K03094, K04348, K16273	0
ko04330 Notch signaling pathway	K06065	0
ko04340 Hedgehog signaling pathway	K03083	0
ko04341 Hedgehog signaling pathway - fly	K03083, K03094	0
ko04350 TGF-beta signaling pathway	K03094	0
ko04360 Axon guidance	K03083, K04348, K04366, K05725	0
ko04361 Axon regeneration	K06704	0
ko04370 VEGF signaling pathway	K04348, K04366, K05725, K05760	0
ko04371 Apelin signaling pathway	K04347, K04366, K04539, K04541, K07200	0
ko04380 Osteoclast differentiation	K04348	0
ko04390 Hippo signaling pathway	K03083, K04412	0
ko04391 Hippo signaling pathway - fly	K04412	0
ko04392 Hippo signaling pathway - multiple species	K04412	0
ko04510 Focal adhesion	K03083, K04366, K04437, K05725, K05760, K06270, K06271, K06279	0
ko04520 Adherens junction	K05698, K20644	0
ko04530 Tight junction	K05758, K07200, K07839, K07901, K17260	0
ko04540 Gap junction	K04366	0
ko04550 Signaling pathways regulating pluripotency of stem cells	K03083, K04366	0
ko04610 Complement and coagulation cascades	K01315, K03898	0
ko04611 Platelet activation	K06270, K06271	0
ko04612 Antigen processing and presentation	K08056	0
ko04613 Neutrophil extracellular trap formation	K04366, K09565	0
ko04622 RIG-I-like receptor signaling pathway	K00863	0
ko04624 Toll and Imd signaling pathway	K10580	0
ko04625 C-type lectin receptor signaling pathway	K04348, K04366, K12496	0
ko04626 Plant-pathogen interaction	K01373	0
ko04630 JAK-STAT signaling pathway	K04366	0
ko04650 Natural killer cell mediated cytotoxicity	K04348, K04366, K06279	0
ko04657 IL-17 signaling pathway	K03083	0
ko04658 Th1 and Th2 cell differentiation	K04348	0
ko04659 Th17 cell differentiation	K04348	0
ko04660 T cell receptor signaling pathway	K03083, K04348, K04366	0
ko04662 B cell receptor signaling pathway	K03083, K04348, K04366	0
ko04664 Fc epsilon RI signaling pathway	K04366	0
ko04666 Fc gamma R-mediated phagocytosis	K04366, K05758, K16343, K17260	0
ko04670 Leukocyte transendothelial migration	K05725, K05760	0
ko04710 Circadian rhythm	K03094, K07200	0
ko04711 Circadian rhythm - fly	K03083	0
ko04713 Circadian entrainment	K04347, K04539, K04541	0
ko04714 Thermogenesis	K04373, K07200	0
ko04720 Long-term potentiation	K04348, K04366, K04373	0
ko04722 Neurotrophin signaling pathway	K03083, K04366, K04373, K06279	0
ko04723 Retrograde endocannabinoid signaling	K04347, K04539, K04541	0
ko04724 Glutamatergic synapse	K04347, K04348, K04539, K04541	0
ko04725 Cholinergic synapse	K04347, K04539, K04541	0
ko04726 Serotonergic synapse	K04347, K04366, K04539, K04541	0
ko04727 GABAergic synapse	K04347, K04539, K04541	0
ko04728 Dopaminergic synapse	K03083, K04347, K04348, K04539, K04541	0
ko04730 Long-term depression	K04366	0
ko04740 Olfactory transduction	K19695	0
ko04750 Inflammatory mediator regulation of TRP channels	K03898, K04984, K16343	0
ko04810 Regulation of actin cytoskeleton	K00921, K03898, K04347, K04366, K05725, K05749, K05758, K05759, K05760, K06270, K17260	0
ko04910 Insulin signaling pathway	K00693, K03083, K04366, K06279, K07200	0
ko04911 Insulin secretion	K04194	0
ko04912 GnRH signaling pathway	K04366	0
ko04914 Progesterone-mediated oocyte maturation	K04366, K04373, K06631, K08837	0
ko04915 Estrogen signaling pathway	K04366, K06279, K11256	0
ko04916 Melanogenesis	K03083, K04366	0
ko04917 Prolactin signaling pathway	K03083, K04366, K06279	0
ko04919 Thyroid hormone signaling pathway	K03083, K04366, K08362, K11256	0
ko04920 Adipocytokine signaling pathway	K07200	0
ko04921 Oxytocin signaling pathway	K04348, K04366, K06270, K07200	0
ko04922 Glucagon signaling pathway	K00693, K04348, K07200	0
ko04924 Renin secretion	K04348	0
ko04925 Aldosterone synthesis and secretion	K05850	0
ko04926 Relaxin signaling pathway	K04347, K04366, K04539, K04541, K06279	0
ko04928 Parathyroid hormone synthesis, secretion and action	K04366, K16529	0
ko04929 GnRH secretion	K04366	0
ko04931 Insulin resistance	K00693, K03083, K04373, K07200, K08745	0
ko04932 Non-alcoholic fatty liver disease	K03083, K07200, K08860	0
ko04934 Cushing syndrome	K03083, K11839, K14961, K17454	0
ko04935 Growth hormone synthesis, secretion and action	K03083, K04366, K05725, K06279	0
ko04936 Alcoholic liver disease	K03083, K07200	0
ko04961 Endocrine and other factor-regulated calcium reabsorption	K05850	0
ko04962 Vasopressin-regulated water reabsorption	K10413	0
ko04970 Salivary secretion	K05850	0
ko04972 Pancreatic secretion	K04194, K05850, K07901	0
ko04974 Protein digestion and absorption	K14206	0
ko04975 Fat digestion and absorption	K08745	0
ko04978 Mineral absorption	K05850, K14688, K14704	0
ko05010 Alzheimer disease	K03083, K04348, K04366, K06704, K08269, K08860, K09565, K17906	0
ko05012 Parkinson disease	K08860, K09565	0
ko05014 Amyotrophic lateral sclerosis	K04348, K05759, K07901, K08269, K08860, K10425, K17906	0
ko05016 Huntington disease	K08269, K09565, K10425, K17906	0
ko05017 Spinocerebellar ataxia	K08269, K09565, K17906	0
ko05020 Prion disease	K03083, K04348, K08860, K09565	0
ko05022 Pathways of neurodegeneration - multiple diseases	K03083, K04348, K04366, K07901, K08269, K08860, K09565, K10425, K17906	0
ko05031 Amphetamine addiction	K04348	0
ko05032 Morphine addiction	K04347, K04539, K04541	0
ko05034 Alcoholism	K04347, K04366, K04539, K04541, K06279	0
ko05100 Bacterial invasion of epithelial cells	K05725, K05758, K05760, K06279, K17260	0
ko05110 Vibrio cholerae infection	K10956	0
ko05120 Epithelial cell signaling in Helicobacter pylori infection	K06704	0
ko05130 Pathogenic Escherichia coli infection	K05749, K05758, K14007, K17260	0
ko05131 Shigellosis	K03083, K03094, K05725, K05758, K05759, K05760, K06271, K10580, K17260	0
ko05132 Salmonella infection	K03094, K04366, K04437, K05749, K05758, K05759, K10413, K10425, K15348, K17260, K20181	0
ko05133 Pertussis	K15125	0
ko05135 Yersinia infection	K03083, K04373, K05725, K05758, K05760, K17260	0
ko05142 Chagas disease	K03898	0
ko05143 African trypanosomiasis	K03898	0
ko05145 Toxoplasmosis	K09565	0
ko05146 Amoebiasis	K05725	0
ko05150 Staphylococcus aureus infection	K01315	0
ko05152 Tuberculosis	K04348, K04366	0
ko05160 Hepatitis C	K03083, K04366, K08860, K16196, K17454	0
ko05161 Hepatitis B	K04366, K12496, K17454	0
ko05162 Measles	K03083, K08860, K16196	0
ko05163 Human cytomegalovirus infection	K03083, K04347, K04348, K04366, K04539, K04541, K05725, K05760, K08056, K16529, K17454	0
ko05164 Influenza A	K01315, K04366	0
ko05165 Human papillomavirus infection	K03083, K04366, K05725, K05760, K17454	0
ko05166 Human T-cell leukemia virus 1 infection	K02216, K03363, K04348, K06271, K12496, K17454	0
ko05167 Kaposi sarcoma-associated herpesvirus infection	K03083, K04347, K04348, K04366, K04539, K04541, K17454	0
ko05168 Herpes simplex virus 1 infection	K03240, K08056, K08860, K09228, K16196	0
ko05169 Epstein-Barr virus infection	K06065, K08056, K17454	0
ko05170 Human immunodeficiency virus 1 infection	K02216, K03094, K04347, K04348, K04366, K04539, K04541, K05725, K05760, K08056	0
ko05171 Coronavirus disease - COVID-19	K02943	0
ko05200 Pathways in cancer	K03083, K03094, K03898, K04347, K04366, K04482, K04539, K04541, K05725, K08803, K11256, K17454	0
ko05202 Transcriptional misregulation in cancer	K05725	0
ko05203 Viral carcinogenesis	K02216, K03363, K05760, K12496	0
ko05205 Proteoglycans in cancer	K04366, K04437, K05725, K05760, K06270	0
ko05206 MicroRNAs in cancer	K04366, K06279, K17454	0
ko05207 Chemical carcinogenesis - receptor activation	K04366, K04373, K17454	0
ko05208 Chemical carcinogenesis - reactive oxygen species	K04366, K05698, K05725, K09565, K14704	0
ko05210 Colorectal cancer	K03083, K04366	0
ko05211 Renal cell carcinoma	K04366	0
ko05212 Pancreatic cancer	K04366, K04482, K17454	0
ko05213 Endometrial cancer	K03083, K04366	0
ko05214 Glioma	K04366, K06279, K17454	0
ko05215 Prostate cancer	K03083, K04366, K17454	0
ko05217 Basal cell carcinoma	K03083	0
ko05218 Melanoma	K04366, K17454	0
ko05219 Bladder cancer	K04366, K08803, K17454	0
ko05220 Chronic myeloid leukemia	K04366, K06279, K17454	0
ko05221 Acute myeloid leukemia	K04366	0
ko05222 Small cell lung cancer	K05725, K17454	0
ko05223 Non-small cell lung cancer	K04366, K17454	0
ko05224 Breast cancer	K03083, K04366, K06279, K11256, K17454	0
ko05225 Hepatocellular carcinoma	K03083, K04366, K06279, K17454	0
ko05226 Gastric cancer	K03083, K04366, K06279, K17454	0
ko05230 Central carbon metabolism in cancer	K04366	0
ko05231 Choline metabolism in cancer	K00968, K04366, K06128	0
ko05235 PD-L1 expression and PD-1 checkpoint pathway in cancer	K04348, K04366	0
ko05340 Primary immunodeficiency	K03648	0
ko05410 Hypertrophic cardiomyopathy	K07200	0
ko05415 Diabetic cardiomyopathy	K00693, K03083, K09565	0
ko05417 Lipid and atherosclerosis	K03083, K04348, K05725, K08860	0
ko05418 Fluid shear stress and atherosclerosis	K05725	0

## Sheet: Fungi
Fungi
Pathway	Kos	P-value
ko00010 Glycolysis / Gluconeogenesis	K13979	0
ko00030 Pentose phosphate pathway	K07404	0
ko00040 Pentose and glucuronate interconversions	K03331, K22935	0
ko00051 Fructose and mannose metabolism	K00863, K01218	0
ko00052 Galactose metabolism	K12309	0
ko00061 Fatty acid biosynthesis	K11262	0
ko00100 Steroid biosynthesis	K00227	0
ko00130 Ubiquinone and other terpenoid-quinone biosynthesis	K00815	0
ko00140 Steroid hormone biosynthesis	K07424	0
ko00190 Oxidative phosphorylation	K02154	0
ko00195 Photosynthesis	K02636, K02695	0
ko00220 Arginine biosynthesis	K14677	0
ko00230 Purine metabolism	K13811, K18283	0
ko00250 Alanine, aspartate and glutamate metabolism	K00139	0
ko00253 Tetracycline biosynthesis	K14257	0
ko00254 Aflatoxin biosynthesis	K11262	0
ko00260 Glycine, serine and threonine metabolism	K01697	0
ko00261 Monobactam biosynthesis	K13811	0
ko00270 Cysteine and methionine metabolism	K00815, K01697, K08969	0
ko00330 Arginine and proline metabolism	K12259, K17839, K18123	0
ko00350 Tyrosine metabolism	K00815	0
ko00360 Phenylalanine metabolism	K00815	0
ko00362 Benzoate degradation	K20944, K22270	0
ko00400 Phenylalanine, tyrosine and tryptophan biosynthesis	K00815	0
ko00401 Novobiocin biosynthesis	K00815	0
ko00404 Staurosporine biosynthesis	K14257	0
ko00410 beta-Alanine metabolism	K12259, K17839	0
ko00430 Taurine and hypotaurine metabolism	K00925	0
ko00440 Phosphonate and phosphinate metabolism	K00967, K00968, K00993, K00994	0
ko00450 Selenocompound metabolism	K13811	0
ko00480 Glutathione metabolism	K05361, K23790	0
ko00500 Starch and sucrose metabolism	K00693, K00696, K01194, K01196	0
ko00510 N-Glycan biosynthesis	K01230, K03849, K05546, K07151, K23741	0
ko00511 Other glycan degradation	K01201, K12309, K12311	0
ko00512 Mucin type O-glycan biosynthesis	K09663	0
ko00513 Various types of N-glycan biosynthesis	K01230, K07151, K23741	0
ko00520 Amino sugar and nucleotide sugar metabolism	K00698, K00972, K01787, K15910	0
ko00531 Glycosaminoglycan degradation	K12309	0
ko00532 Glycosaminoglycan biosynthesis - chondroitin sulfate / dermatan sulfate	K00771	0
ko00534 Glycosaminoglycan biosynthesis - heparan sulfate / heparin	K00771	0
ko00543 Exopolysaccharide biosynthesis	K13684	0
ko00550 Peptidoglycan biosynthesis	K12555, K21464	0
ko00561 Glycerolipid metabolism	K00863, K13979, K14074	0
ko00562 Inositol phosphate metabolism	K00888, K00914, K00920, K00921, K00922, K00999, K10572, K19801	0
ko00563 Glycosylphosphatidylinositol (GPI)-anchor biosynthesis	K23362	0
ko00564 Glycerophospholipid metabolism	K00894, K00967, K00968, K00993, K00994, K00999, K05929, K06128, K16343	0
ko00565 Ether lipid metabolism	K00993, K00994, K16343, K20656	0
ko00590 Arachidonic acid metabolism	K05361, K16343	0
ko00591 Linoleic acid metabolism	K07424, K15718, K16343	0
ko00592 alpha-Linolenic acid metabolism	K16343	0
ko00600 Sphingolipid metabolism	K01201, K12309	0
ko00601 Glycosphingolipid biosynthesis - lacto and neolacto series	K01988	0
ko00603 Glycosphingolipid biosynthesis - globo and isoglobo series	K01988	0
ko00604 Glycosphingolipid biosynthesis - ganglio series	K12309	0
ko00620 Pyruvate metabolism	K00925, K11262, K13979	0
ko00627 Aminobenzoate degradation	K03862	0
ko00630 Glyoxylate and dicarboxylate metabolism	K00048, K01608, K18123	0
ko00640 Propanoate metabolism	K00048, K00925, K11262	0
ko00650 Butanoate metabolism	K00139	0
ko00680 Methane metabolism	K00863, K00925	0
ko00720 Carbon fixation pathways in prokaryotes	K00925	0
ko00740 Riboflavin metabolism	K00861	0
ko00760 Nicotinate and nicotinamide metabolism	K06210	0
ko00770 Pantothenate and CoA biosynthesis	K17839	0
ko00790 Folate biosynthesis	K01930	0
ko00791 Atrazine degradation	K08710	0
ko00830 Retinol metabolism	K07424	0
ko00860 Porphyrin metabolism	K10960, K14163	0
ko00900 Terpenoid backbone biosynthesis	K05355, K05906, K10960, K12504	0
ko00906 Carotenoid biosynthesis	K10210	0
ko00910 Nitrogen metabolism	K01672	0
ko00920 Sulfur metabolism	K13811	0
ko00950 Isoquinoline alkaloid biosynthesis	K00815	0
ko00960 Tropane, piperidine and pyridine alkaloid biosynthesis	K00815	0
ko00970 Aminoacyl-tRNA biosynthesis	K14163, K22503	0
ko00980 Metabolism of xenobiotics by cytochrome P450	K01253, K23790	0
ko00982 Drug metabolism - cytochrome P450	K23790	0
ko00983 Drug metabolism - other enzymes	K03927, K23790	0
ko00998 Biosynthesis of various antibiotics	K19550	0
ko01057 Biosynthesis of type II polyketide products	K14257	0
ko01100 Metabolic pathways	K00048, K00139, K00227, K00693, K00696, K00698, K00771, K00815, K00861, K00863, K00888, K00894, K00914, K00920, K00921, K00922, K00925, K00967, K00968, K00972, K00993, K00994, K00999, K01194, K01196, K01201, K01218, K01230, K01608, K01672, K01697, K01787, K01930, K01988, K02154, K02636, K02695, K03331, K03849, K05361, K05546, K06210, K07151, K07404, K07424, K08710, K08969, K09663, K10572, K10960,…	0
ko01110 Biosynthesis of secondary metabolites	K00227, K00693, K00696, K00815, K00861, K00993, K01194, K01196, K01697, K05355, K05906, K07404, K10210, K10960, K11262, K12504, K13811, K13979, K14163, K14257, K14677, K16343, K19550	0
ko01120 Microbial metabolism in diverse environments	K00048, K00139, K00863, K00925, K03862, K07404, K08710, K11262, K13811, K13979, K14163, K20944, K22270	0
ko01200 Carbon metabolism	K00863, K00925, K07404	0
ko01210 2-Oxocarboxylic acid metabolism	K14677	0
ko01212 Fatty acid metabolism	K11262	0
ko01230 Biosynthesis of amino acids	K01697, K14677	0
ko01240 Biosynthesis of cofactors	K00861, K01930, K06210, K14163	0
ko01250 Biosynthesis of nucleotide sugars	K00972, K15910	0
ko01501 beta-Lactam resistance	K12555	0
ko01521 EGFR tyrosine kinase inhibitor resistance	K00922, K03083, K03099, K04365, K04371, K04456, K04570, K07203	0
ko01522 Endocrine resistance	K00922, K03099, K04365, K04371, K04456, K04684, K05725, K07203	0
ko01523 Antifolate resistance	K01930, K05665, K05673	0
ko01524 Platinum drug resistance	K00922, K02084, K04371, K04456, K04570, K08735, K14021, K23790	0
ko02010 ABC transporters	K05641, K05665, K05673, K05815, K10201, K10556	0
ko02020 Two-component system	K07653, K11354, K11525	0
ko02024 Quorum sensing	K01218, K10556	0
ko02026 Biofilm formation - Escherichia coli	K04761	0
ko03008 Ribosome biogenesis in eukaryotes	K03097, K03115, K03264, K07179, K14536, K14539, K14554, K14556	0
ko03013 Nucleocytoplasmic transport	K12880, K12881, K14298, K14309, K14325, K14326	0
ko03015 mRNA surveillance pathway	K03265, K03456, K04354, K04382, K06965, K11583, K12881, K14325, K14326, K14376, K14399, K14416	0
ko03018 RNA degradation	K11600, K12585, K12589, K12598, K12603, K12614	0
ko03020 RNA polymerase	K02999, K03018, K03021	0
ko03022 Basal transcription factors	K03135	0
ko03030 DNA replication	K02209, K02212, K02324, K02327, K02540, K02541, K04799, K10755, K10756	0
ko03040 Spliceosome	K12813, K12815, K12819, K12831, K12833, K12837, K12838, K12842, K12852, K12854, K12856, K12859, K12862, K12872, K12880, K12881, K12892, K12896, K12897	0
ko03050 Proteasome	K02739, K03032, K03033, K03035, K03036, K03037, K03065	0
ko03060 Protein export	K10956, K13431	0
ko03250 Viral life cycle - HIV-1	K12182, K12196, K15172	0
ko03320 PPAR signaling pathway	K01388, K06272, K08745	0
ko03410 Base excision repair	K02324, K02327, K03648, K04799, K10755, K10756, K10776, K24070	0
ko03420 Nucleotide excision repair	K02324, K02327, K10570, K10755, K10756, K10841	0
ko03430 Mismatch repair	K02327, K08735, K10755, K10756, K10858	0
ko03440 Homologous recombination	K01159, K02327, K04482, K10875, K10901	0
ko03450 Non-homologous end-joining	K04799	0
ko03460 Fanconi anemia pathway	K04482, K10858, K10901, K10990, K11137	0
ko04010 MAPK signaling pathway	K03099, K04347, K04348, K04353, K04365, K04371, K04372, K04373, K04405, K04412, K04422, K04427, K04437, K04456, K04459, K04461, K05121, K07860	0
ko04011 MAPK signaling pathway - yeast	K00888, K04371, K04513	0
ko04012 ErbB signaling pathway	K00922, K03083, K03099, K04365, K04371, K04456, K05725, K07203	0
ko04013 MAPK signaling pathway - fly	K03099, K04365, K04371, K04382, K04427, K04461, K05759, K08892, K17608	0
ko04014 Ras signaling pathway	K00922, K03099, K04163, K04347, K04353, K04371, K04456, K04513, K04539, K04541, K04570, K05121, K07825, K07860, K07941, K16343	0
ko04015 Rap1 signaling pathway	K00922, K04353, K04365, K04371, K04456, K04513, K04534, K05121, K05692, K05759, K06069, K06271, K06277, K07860	0
ko04020 Calcium signaling pathway	K04163, K04194, K04348, K05850, K09565	0
ko04022 cGMP-PKG signaling pathway	K03898, K04348, K04371, K04456, K04513, K05850, K06270, K09565, K18283	0
ko04024 cAMP signaling pathway	K00922, K04353, K04365, K04371, K04456, K04513, K05673, K05850, K06270, K07860	0
ko04060 Cytokine-cytokine receptor interaction	K16621	0
ko04062 Chemokine signaling pathway	K00922, K03083, K03099, K04347, K04353, K04365, K04371, K04456, K04513, K04539, K04541, K05725, K05760, K07825, K07860, K08291	0
ko04064 NF-kappa B signaling pathway	K03097, K03115, K04427, K04570, K24070	0
ko04066 HIF-1 signaling pathway	K00922, K04371, K04372, K04456, K05121, K07203, K09097	0
ko04068 FoxO signaling pathway	K00922, K03099, K04365, K04371, K04456, K06631, K07199, K07200, K08341, K08861, K08960, K10151, K11838	0
ko04070 Phosphatidylinositol signaling system	K00888, K00914, K00920, K00921, K00922, K00999, K10572, K19801	0
ko04071 Sphingolipid signaling pathway	K00922, K01379, K03456, K03898, K04354, K04371, K04382, K04456, K04513, K05665, K07860, K11583	0
ko04072 Phospholipase D signaling pathway	K00922, K03099, K04371, K04456, K04513, K07203, K07941, K18441	0
ko04075 Plant hormone signal transduction	K14501	0
ko04080 Neuroactive ligand-receptor interaction	K01315, K03898, K04163, K04194	0
ko04110 Cell cycle	K02178, K02209, K02212, K02213, K02216, K02540, K02541, K02606, K03083, K03363, K03456, K04382, K06631, K06641, K10151, K10779	0
ko04111 Cell cycle - yeast	K02178, K02209, K02212, K02213, K02216, K02219, K02540, K02541, K02606, K03363, K03456, K04354, K04371, K04382, K06641, K06674, K06675, K06685, K18669	0
ko04113 Meiosis - yeast	K02178, K02209, K02212, K02213, K02216, K02540, K02541, K02606, K03363, K03456, K04382, K07203	0
ko04114 Oocyte meiosis	K02178, K03363, K03456, K04348, K04371, K04373, K04382, K06631, K11481	0
ko04115 p53 signaling pathway	K02084, K02216, K04570, K06641, K10151	0
ko04120 Ubiquitin mediated proteolysis	K02207, K03178, K03363, K04554, K10570, K10580, K10582, K10583, K10588, K10590, K10592, K10686, K10688, K10699	0
ko04122 Sulfur relay system	K14169	0
ko04136 Autophagy - other	K00914, K04382, K07203, K08269, K08334, K08337, K08341, K17890, K17906, K17908	0
ko04137 Mitophagy - animal	K03097, K03115, K04570, K04684, K08334, K08341, K08860, K10592, K11839	0
ko04138 Autophagy - yeast	K00914, K04382, K05756, K05757, K05758, K06027, K07203, K08269, K08334, K08337, K08341, K12479, K16196, K17260, K17890, K17906, K17908, K18584, K20181, K20182	0
ko04139 Mitophagy - yeast	K03097, K03115, K07203, K08269, K08341, K17800	0
ko04140 Autophagy - animal	K00914, K00922, K01365, K01379, K04371, K04382, K04427, K04456, K04570, K07203, K07901, K08269, K08334, K08337, K08341, K08803, K08860, K16196, K17890, K17906, K17908, K20181, K20182	0
ko04141 Protein processing in endoplasmic reticulum	K01230, K04554, K05546, K07151, K08056, K08860, K09485, K09518, K09530, K09582, K10085, K10100, K10666, K10956, K14007, K14016, K14018, K14021, K23741	0
ko04142 Lysosome	K01201, K01275, K01365, K01373, K01379, K02154, K12309, K12311, K12394, K12396, K12404, K25442	0
ko04144 Endocytosis	K04513, K05756, K05757, K05758, K06069, K07876, K07901, K07903, K07904, K07941, K08291, K10364, K10365, K11825, K11839, K12182, K12196, K12478, K12479, K12487, K12491, K17260, K18441, K18442, K18584	0
ko04145 Phagosome	K00914, K00921, K01365, K02154, K05692, K10413, K10956, K12182, K12478	0
ko04146 Peroxisome	K13338, K13342	0
ko04150 mTOR signaling pathway	K00922, K03083, K03099, K03258, K04365, K04371, K04373, K04456, K04513, K07203, K08269, K08272, K11137, K13780	0
ko04151 PI3K-Akt signaling pathway	K00693, K00922, K03083, K03099, K03258, K03456, K04347, K04354, K04371, K04382, K04456, K04539, K04541, K04570, K05121, K05637, K05725, K07203, K07825, K10151, K11583	0
ko04152 AMPK signaling pathway	K00693, K00922, K03456, K04354, K04382, K04427, K04456, K07199, K07200, K07203, K07881, K07901, K07903, K08272, K11262, K11583	0
ko04210 Apoptosis	K00922, K01275, K01365, K01373, K01379, K02084, K02374, K04371, K04456, K04570, K05692, K08860, K14021, K24070	0
ko04211 Longevity regulating pathway	K00922, K04456, K07199, K07200, K07203	0
ko04212 Longevity regulating pathway - worm	K00922, K04456, K07203, K08269, K08341, K24070	0
ko04213 Longevity regulating pathway - multiple species	K00922, K04456, K07199, K07200, K07203	0
ko04214 Apoptosis - fly	K02084, K03262, K04365, K04371, K04412, K04427, K08791, K08860, K24070	0
ko04215 Apoptosis - multiple species	K02084, K04570, K08334, K14021	0
ko04216 Ferroptosis	K05361, K08337, K13869	0
ko04217 Necroptosis	K12196, K24070	0
ko04218 Cellular senescence	K00922, K02216, K04348, K04371, K04456, K06641, K07203, K08826, K10151, K10903, K10994	0
ko04261 Adrenergic signaling in cardiomyocytes	K03456, K04354, K04371, K04382, K04456, K05850, K11583	0
ko04270 Vascular smooth muscle contraction	K04365, K04371, K04513, K06270, K10352, K16343	0
ko04310 Wnt signaling pathway	K03083, K03097, K03115, K04348, K04427, K04505, K04513, K07860, K08960, K10151	0
ko04320 Dorso-ventral axis formation	K03099, K04365, K04371	0
ko04330 Notch signaling pathway	K04505	0
ko04340 Hedgehog signaling pathway	K03083, K08959, K08960, K10151	0
ko04341 Hedgehog signaling pathway - fly	K03083, K08291, K08960	0
ko04350 TGF-beta signaling pathway	K03456, K04371, K04382, K04513, K04684, K16621	0
ko04360 Axon guidance	K00922, K03083, K04348, K04371, K04513, K05725, K06272, K07860, K16621	0
ko04361 Axon regeneration	K00922, K04163, K04422, K04459, K04505, K04513, K04534, K06704, K07203, K10393	0
ko04370 VEGF signaling pathway	K00922, K04348, K04371, K04456, K05725, K05760, K07860	0
ko04371 Apelin signaling pathway	K00914, K04347, K04371, K04456, K04539, K04541, K07199, K07200, K07203, K07825, K08334, K11406	0
ko04380 Osteoclast differentiation	K00922, K04348, K04371, K04427, K04456	0
ko04390 Hippo signaling pathway	K03083, K03456, K04354, K04382, K04412, K05692, K06069, K06685, K08791, K08959, K08960, K10151, K16175, K16621, K16682, K16819	0
ko04391 Hippo signaling pathway - fly	K03456, K04354, K04382, K04412, K05692, K06069, K06095, K06685, K08791, K08960, K16175, K16682	0
ko04392 Hippo signaling pathway - multiple species	K04412, K06685, K08791, K08960, K16682	0
ko04510 Focal adhesion	K00922, K03083, K03099, K04353, K04365, K04371, K04437, K04456, K04513, K05637, K05692, K05725, K05760, K06270, K06271, K06272, K06277, K07860, K10151	0
ko04512 ECM-receptor interaction	K05637	0
ko04520 Adherens junction	K03097, K03115, K04353, K04371, K04427, K04513, K05692, K05698, K07860, K20644	0
ko04530 Tight junction	K03456, K04353, K04354, K04382, K04513, K05692, K05756, K05757, K05758, K06069, K06095, K07199, K07200, K07901, K10352, K16175, K16819, K17260, K18584	0
ko04540 Gap junction	K03099, K04371, K08959	0
ko04550 Signaling pathways regulating pluripotency of stem cells	K00922, K03083, K04371, K04456	0
ko04610 Complement and coagulation cascades	K01315, K03898	0
ko04611 Platelet activation	K00922, K04353, K04371, K04456, K04513, K05692, K06069, K06270, K06271	0
ko04612 Antigen processing and presentation	K01365, K08056	0
ko04613 Neutrophil extracellular trap formation	K00922, K04371, K04427, K04456, K05012, K05692, K07203, K07860, K08337, K09565, K11406	0
ko04614 Renin-angiotensin system	K01257, K01285	0
ko04620 Toll-like receptor signaling pathway	K00922, K04371, K04427, K04456	0
ko04621 NOD-like receptor signaling pathway	K04371, K04427, K04513, K04570, K08341, K17890, K20876	0
ko04622 RIG-I-like receptor signaling pathway	K00863, K04427	0
ko04623 Cytosolic DNA-sensing pathway	K03018, K03021	0
ko04624 Toll and Imd signaling pathway	K04427, K10580	0
ko04625 C-type lectin receptor signaling pathway	K00922, K04348, K04371, K04456, K04513	0
ko04626 Plant-pathogen interaction	K01373	0
ko04630 JAK-STAT signaling pathway	K00922, K03099, K04456, K04570, K07203, K10151	0
ko04650 Natural killer cell mediated cytotoxicity	K00922, K03099, K04348, K04365, K04371, K07860	0
ko04657 IL-17 signaling pathway	K01388, K03083, K04371, K04427, K19603	0
ko04658 Th1 and Th2 cell differentiation	K04348, K04371	0
ko04659 Th17 cell differentiation	K04348, K04371, K07203	0
ko04660 T cell receptor signaling pathway	K00922, K03083, K03099, K03456, K04348, K04354, K04371, K04382, K04427, K04456, K04513, K11583	0
ko04662 B cell receptor signaling pathway	K00922, K03083, K03099, K04348, K04371, K04456, K07860	0
ko04664 Fc epsilon RI signaling pathway	K00922, K03099, K04371, K04456, K07860	0
ko04666 Fc gamma R-mediated phagocytosis	K00922, K04371, K04456, K05756, K05757, K05758, K07860, K07941, K16343, K17260, K18584	0
ko04668 TNF signaling pathway	K00922, K04371, K04427, K04456	0
ko04670 Leukocyte transendothelial migration	K00922, K04353, K04513, K05692, K05725, K05760, K07860	0
ko04710 Circadian rhythm	K07199, K07200, K08959, K08960	0
ko04711 Circadian rhythm - fly	K03083, K08960	0
ko04712 Circadian rhythm - plant	K03097, K03115	0
ko04713 Circadian entrainment	K04347, K04371, K04534, K04539, K04541, K07825	0
ko04714 Thermogenesis	K03099, K04373, K05692, K07199, K07200, K07203, K11647	0
ko04720 Long-term potentiation	K04348, K04353, K04365, K04371, K04373	0
ko04721 Synaptic vesicle cycle	K02154, K05034, K06027, K11825	0
ko04722 Neurotrophin signaling pathway	K00922, K03083, K03099, K04353, K04365, K04371, K04373, K04456, K04505, K04513, K06277	0
ko04723 Retrograde endocannabinoid signaling	K04347, K04371, K04534, K04539, K04541, K07825	0
ko04724 Glutamatergic synapse	K04347, K04348, K04371, K04534, K04539, K04541, K07825	0
ko04725 Cholinergic synapse	K00922, K04347, K04371, K04456, K04534, K04539, K04541, K07825	0
ko04726 Serotonergic synapse	K04163, K04347, K04365, K04371, K04534, K04539, K04541, K07825	0
ko04727 GABAergic synapse	K04347, K04534, K04539, K04541, K05034, K06027, K07825, K08341	0
ko04728 Dopaminergic synapse	K03083, K03456, K04347, K04348, K04354, K04382, K04456, K04534, K04539, K04541, K07825, K11583	0
ko04730 Long-term depression	K03456, K04365, K04371, K04382, K04534	0
ko04740 Olfactory transduction	K18283	0
ko04742 Taste transduction	K07825	0
ko04745 Phototransduction - fly	K05692	0
ko04750 Inflammatory mediator regulation of TRP channels	K00922, K03898, K04984, K16343	0
ko04810 Regulation of actin cytoskeleton	K00920, K00921, K00922, K03099, K03898, K04347, K04365, K04371, K04456, K04513, K05692, K05725, K05749, K05756, K05757, K05758, K05759, K05760, K06270, K07860, K10352, K17260, K18584	0
ko04910 Insulin signaling pathway	K00693, K00922, K03083, K03099, K04365, K04371, K04372, K04456, K06069, K06277, K07199, K07200, K07203, K11262	0
ko04911 Insulin secretion	K04194	0
ko04912 GnRH signaling pathway	K03099, K04371	0
ko04914 Progesterone-mediated oocyte maturation	K00922, K02178, K04365, K04371, K04373, K04456, K06631, K11481	0
ko04915 Estrogen signaling pathway	K00922, K01379, K03099, K04371, K04456, K04534, K04684	0
ko04916 Melanogenesis	K03083, K04371, K04534	0
ko04917 Prolactin signaling pathway	K00922, K03083, K03099, K04371, K04456, K10151	0
ko04918 Thyroid hormone synthesis	K09582	0
ko04919 Thyroid hormone signaling pathway	K00922, K03083, K04371, K04456, K05692, K07203	0
ko04920 Adipocytokine signaling pathway	K04456, K07199, K07200, K07203	0
ko04921 Oxytocin signaling pathway	K04348, K04371, K04513, K04534, K05692, K06270, K07199, K07200	0
ko04922 Glucagon signaling pathway	K00693, K04348, K04456, K07199, K07200, K11262, K16311	0
ko04923 Regulation of lipolysis in adipocytes	K00922, K04456	0
ko04924 Renin secretion	K04348	0
ko04925 Aldosterone synthesis and secretion	K05850, K18283	0
ko04926 Relaxin signaling pathway	K00922, K01388, K03099, K04347, K04371, K04456, K04534, K04539, K04541, K07825	0
ko04927 Cortisol synthesis and secretion	K04684	0
ko04928 Parathyroid hormone synthesis, secretion and action	K04365, K04371, K04513, K04684, K08835, K08867, K16529	0
ko04929 GnRH secretion	K00922, K04371, K04456	0
ko04930 Type II diabetes mellitus	K00922, K04371, K07203	0
ko04931 Insulin resistance	K00693, K00922, K03083, K04373, K04456, K07199, K07200, K07203, K08745	0
ko04932 Non-alcoholic fatty liver disease	K00922, K03083, K04456, K07199, K07200, K08860	0
ko04933 AGE-RAGE signaling pathway in diabetic complications	K00922, K04371, K04456	0
ko04934 Cushing syndrome	K03083, K04353, K04365, K04371, K04684, K09097, K11839, K14961	0
ko04935 Growth hormone synthesis, secretion and action	K00922, K03083, K03099, K04371, K04456, K05725, K07203	0
ko04936 Alcoholic liver disease	K03083, K04427, K04456, K07199, K07200, K11262, K12897	0
ko04960 Aldosterone-regulated sodium reabsorption	K00922, K04371	0
ko04961 Endocrine and other factor-regulated calcium reabsorption	K05850, K07904, K11825	0
ko04962 Vasopressin-regulated water reabsorption	K06027, K07904, K10413	0
ko04966 Collecting duct acid secretion	K02154	0
ko04970 Salivary secretion	K05850	0
ko04971 Gastric acid secretion	K05692	0
ko04972 Pancreatic secretion	K04194, K04353, K04513, K05850, K07901, K07904, K09632, K14074	0
ko04973 Carbohydrate digestion and absorption	K00922, K04456, K14158	0
ko04974 Protein digestion and absorption	K01278, K01285, K09632, K14206	0
ko04975 Fat digestion and absorption	K05641, K08745, K14074	0
ko04976 Bile secretion	K01253, K05673, K14158	0
ko04977 Vitamin digestion and absorption	K05665, K14386	0
ko04978 Mineral absorption	K05850, K14158, K14688, K14704, K14710	0
ko04979 Cholesterol metabolism	K05641	0
ko05010 Alzheimer disease	K00914, K00922, K01408, K02084, K02739, K03032, K03033, K03035, K03036, K03037, K03065, K03083, K03097, K03115, K04348, K04365, K04371, K04456, K04505, K04532, K06704, K07203, K08269, K08334, K08860, K08960, K09565, K14709, K14710, K17906, K17908	0
ko05012 Parkinson disease	K02084, K02739, K03032, K03033, K03035, K03036, K03037, K03065, K03178, K04554, K04570, K08860, K09565, K14709, K14710	0
ko05014 Amyotrophic lateral sclerosis	K00914, K02084, K02739, K03032, K03033, K03035, K03036, K03037, K03065, K04348, K04570, K05692, K05759, K07203, K07901, K08269, K08334, K08860, K10425, K12881, K12892, K12896, K13158, K14298, K14309, K17906, K17908	0
ko05016 Huntington disease	K00914, K02084, K02739, K03032, K03033, K03035, K03036, K03037, K03065, K04684, K07203, K08269, K08334, K09565, K10425, K11825, K17906, K17908	0
ko05017 Spinocerebellar ataxia	K00914, K00922, K02739, K03032, K03033, K03035, K03036, K03037, K03065, K04456, K04684, K07203, K08269, K08334, K09565, K11304, K17906, K17908	0
ko05020 Prion disease	K00922, K02084, K02739, K03032, K03033, K03035, K03036, K03037, K03065, K03083, K03097, K03115, K04348, K04371, K07860, K08860, K09565	0
ko05022 Pathways of neurodegeneration - multiple diseases	K00914, K02084, K02739, K03032, K03033, K03035, K03036, K03037, K03065, K03083, K03097, K03115, K03178, K04348, K04365, K04371, K04505, K04554, K04570, K07203, K07901, K08269, K08334, K08860, K08960, K09565, K10425, K14021, K17906, K17908	0
ko05031 Amphetamine addiction	K04348	0
ko05032 Morphine addiction	K04347, K04534, K04539, K04541, K07825, K08291, K18283	0
ko05034 Alcoholism	K03099, K04347, K04365, K04371, K04534, K04539, K04541, K07825, K11406	0
ko05100 Bacterial invasion of epithelial cells	K00922, K04513, K05692, K05725, K05756, K05757, K05758, K05760, K06272, K17260, K18584	0
ko05110 Vibrio cholerae infection	K02154, K05692, K09582, K10956	0
ko05120 Epithelial cell signaling in Helicobacter pylori infection	K02154, K05728, K06704	0
ko05130 Pathogenic Escherichia coli infection	K04371, K04427, K04513, K05692, K05749, K05756, K05757, K05758, K06185, K07941, K10352, K14007, K14021, K17260, K18441, K18584	0
ko05131 Shigellosis	K00914, K00922, K03083, K04371, K04427, K04456, K04513, K04570, K05692, K05725, K05756, K05757, K05758, K05759, K05760, K06271, K06272, K07203, K07941, K08334, K10580, K16944, K17260, K17890, K17908, K18441, K18584	0
ko05132 Salmonella infection	K00914, K00922, K04371, K04427, K04437, K04456, K04513, K05692, K05749, K05756, K05757, K05758, K05759, K07941, K07955, K10413, K10425, K14021, K15348, K17260, K18441, K18584, K20181, K20182	0
ko05133 Pertussis	K04371, K04513	0
ko05134 Legionellosis	K02084, K14416	0
ko05135 Yersinia infection	K00922, K03083, K04371, K04373, K04427, K04456, K04513, K05692, K05725, K05756, K05757, K05758, K05760, K07860, K07941, K12487, K17260, K18584	0
ko05140 Leishmaniasis	K04371, K04427	0
ko05142 Chagas disease	K00922, K03456, K03898, K04354, K04371, K04382, K04456, K04534	0
ko05143 African trypanosomiasis	K03898, K13823	0
ko05144 Malaria	K13823	0
ko05145 Toxoplasmosis	K04371, K04427, K04456, K04534, K04570, K05637, K09565	0
ko05146 Amoebiasis	K00922, K05637, K05725	0
ko05150 Staphylococcus aureus infection	K01315	0
ko05152 Tuberculosis	K00914, K01379, K02084, K02154, K04348, K04371, K04456, K04513, K12478	0
ko05160 Hepatitis C	K00922, K02084, K03083, K03099, K03456, K04354, K04365, K04371, K04382, K04456, K08860, K14021, K16194, K16196	0
ko05161 Hepatitis B	K00922, K02084, K03099, K04365, K04371, K04427, K04456	0
ko05162 Measles	K00922, K02084, K03083, K03097, K03115, K04427, K04456, K04570, K08860, K10151, K14021, K16194, K16196	0
ko05163 Human cytomegalovirus infection	K00922, K03083, K03099, K04347, K04348, K04371, K04456, K04513, K04534, K04539, K04541, K04684, K05725, K05760, K07203, K07825, K07860, K08056, K14021, K16529	0
ko05164 Influenza A	K00922, K01315, K02084, K04371, K04456, K05692, K07904, K14021, K14298	0
ko05165 Human papillomavirus infection	K00922, K02154, K03083, K03099, K03456, K04354, K04371, K04382, K04456, K04505, K05637, K05725, K05760, K06069, K07203, K10151, K11583, K14021, K16175	0
ko05166 Human T-cell leukemia virus 1 infection	K00922, K02216, K03363, K04348, K04371, K04456, K04570, K06271, K06641, K08874, K10151, K11304	0
ko05167 Kaposi sarcoma-associated herpesvirus infection	K00914, K00922, K03083, K04347, K04348, K04371, K04456, K04539, K04541, K07203, K07825, K08334, K14021	0
ko05168 Herpes simplex virus 1 infection	K00922, K02084, K03239, K03240, K04427, K04456, K04570, K07203, K08056, K08860, K09228, K12881, K12892, K12896, K14021, K14966, K16194, K16196	0
ko05169 Epstein-Barr virus infection	K00922, K02084, K03032, K03033, K03035, K03036, K03037, K03065, K04427, K04456, K08056, K10151, K11838, K14021	0
ko05170 Human immunodeficiency virus 1 infection	K00922, K02216, K04347, K04348, K04371, K04427, K04456, K04534, K04539, K04541, K04570, K05725, K05760, K07203, K07825, K07860, K08056, K12394, K14021	0
ko05171 Coronavirus disease - COVID-19	K00922, K01388, K04371, K04427	0
ko05200 Pathways in cancer	K00922, K01388, K02084, K02219, K03083, K03099, K03898, K04347, K04365, K04371, K04456, K04482, K04513, K04539, K04541, K04570, K04684, K05637, K05725, K07203, K07825, K07860, K08735, K08803, K09097, K10151, K14021, K23790	0
ko05202 Transcriptional misregulation in cancer	K04570, K04684, K05725, K10151, K14021, K22046	0
ko05203 Viral carcinogenesis	K00922, K02216, K03363, K04371, K04513, K05760, K10151, K11406, K11838, K14021, K16175	0
ko05204 Chemical carcinogenesis - DNA adducts	K01253, K07424, K23790	0
ko05205 Proteoglycans in cancer	K00922, K01365, K03099, K03258, K04365, K04371, K04437, K04456, K04513, K05692, K05725, K05760, K06270, K07203, K10380	0
ko05206 MicroRNAs in cancer	K00922, K03099, K04371, K04513, K05665, K07203, K10151, K11406, K14021	0
ko05207 Chemical carcinogenesis - receptor activation	K00922, K01253, K02213, K03099, K04371, K04373, K04456, K07203, K07424, K09097	0
ko05208 Chemical carcinogenesis - reactive oxygen species	K00922, K01253, K03099, K04365, K04371, K04456, K05698, K05725, K09097, K09565, K14701, K14704	0
ko05210 Colorectal cancer	K00922, K03083, K03099, K04365, K04371, K04456, K04513, K07203, K07860, K08735, K14021	0
ko05211 Renal cell carcinoma	K00922, K03099, K04353, K04365, K04371, K04456, K06277, K09097	0
ko05212 Pancreatic cancer	K00922, K04365, K04371, K04456, K04482, K04570, K07203, K07860, K14021	0
ko05213 Endometrial cancer	K00922, K03083, K03099, K04365, K04371, K04456, K06272, K14021	0
ko05214 Glioma	K00922, K03099, K04365, K04371, K04456, K07203, K14021	0
ko05215 Prostate cancer	K00922, K03083, K03099, K04365, K04371, K04456, K07203, K23790	0
ko05216 Thyroid cancer	K04365, K04371, K14021	0
ko05217 Basal cell carcinoma	K03083, K14021	0
ko05218 Melanoma	K00922, K04365, K04371, K04456, K14021	0
ko05219 Bladder cancer	K01388, K04365, K04371, K08803	0
ko05220 Chronic myeloid leukemia	K00922, K03099, K04365, K04371, K04456, K04570, K14021	0
ko05221 Acute myeloid leukemia	K00922, K03099, K04365, K04371, K04456, K07203	0
ko05222 Small cell lung cancer	K00922, K02084, K02219, K04456, K04570, K05637, K05725, K14021	0
ko05223 Non-small cell lung cancer	K00922, K03099, K04365, K04371, K04456, K14021	0
ko05224 Breast cancer	K00922, K03083, K03099, K04365, K04371, K04456, K04684, K07203, K14021	0
ko05225 Hepatocellular carcinoma	K00922, K03083, K03099, K04365, K04371, K04456, K04570, K05692, K07203, K11647, K14021, K23790	0
ko05226 Gastric cancer	K00922, K03083, K03099, K04365, K04371, K04456, K07203, K14021	0
ko05230 Central carbon metabolism in cancer	K00922, K04371, K04456, K07203, K13780	0
ko05231 Choline metabolism in cancer	K00922, K00968, K00994, K03099, K04371, K04456, K04684, K06128, K07203, K07860	0
ko05235 PD-L1 expression and PD-1 checkpoint pathway in cancer	K00922, K03097, K03115, K04348, K04371, K04456, K07203	0
ko05323 Rheumatoid arthritis	K01365, K01388, K02154, K05121	0
ko05340 Primary immunodeficiency	K03648	0
ko05410 Hypertrophic cardiomyopathy	K05637, K05692, K07199, K07200	0
ko05412 Arrhythmogenic right ventricular cardiomyopathy	K05637, K05692	0
ko05414 Dilated cardiomyopathy	K05637, K05692	0
ko05415 Diabetic cardiomyopathy	K00693, K00922, K01379, K03083, K04456, K04684, K07203, K07860, K09565, K24070	0
ko05416 Viral myocarditis	K03260, K05637, K05692, K07860	0
ko05417 Lipid and atherosclerosis	K00922, K01388, K02084, K03083, K04348, K04353, K04371, K04427, K04456, K04513, K04570, K05641, K05725, K08860, K10645	0
ko05418 Fluid shear stress and atherosclerosis	K00922, K01365, K04427, K04456, K04513, K05692, K05725, K07860, K23790	0
