# Supplementary material for: A metatranscriptomic exploration of fungal and bacterial contributions to allochthonous leaf litter decomposition in the streambed
Source: PeerJ. 2025 Apr 25;13:e19120. doi: 10.7717/peerj.19120 (PMC12036579; doi:10.7717/peerj.19120)
Supplement: Supplemental Information 5 — Raw sequence quality assessment of fungal ITS and bacterial 16S rRNA gene amplicons using FASTQC. [file peerj-13-19120-s005.xlsx]

## Sheet: ITS
ITS amplicon
file	format	type	num_seqs	sum_len	min_len	avg_len	max_len
AFP2_C1_E_R_D01_2_A_r1.fastq.gz	FASTQ	DNA	47218	13942831	208	295.3	296
AFP2_C1_E_R_D01_2_A_r2.fastq.gz	FASTQ	DNA	47218	13942831	208	295.3	296
AFP2_C1_E_R_D01_2_B_r1.fastq.gz	FASTQ	DNA	50284	14791583	134	294.2	295
AFP2_C1_E_R_D01_2_B_r2.fastq.gz	FASTQ	DNA	50284	14892151	136	296.2	297
AFP2_C1_E_R_D02_35_A_r1.fastq.gz	FASTQ	DNA	47573	14055652	202	295.5	296
AFP2_C1_E_R_D02_35_A_r2.fastq.gz	FASTQ	DNA	47573	14055652	202	295.5	296
AFP2_C1_E_R_D02_35_B_r1.fastq.gz	FASTQ	DNA	29477	8668582	154	294.1	295
AFP2_C1_E_R_D02_35_B_r2.fastq.gz	FASTQ	DNA	29477	8727536	156	296.1	297
AFP2_C1_E_R_D03_62_A_r1.fastq.gz	FASTQ	DNA	42218	12413557	115	294	296
AFP2_C1_E_R_D03_62_A_r2.fastq.gz	FASTQ	DNA	42218	12413557	115	294	296
AFP2_C1_E_R_D03_62_B_r1.fastq.gz	FASTQ	DNA	42049	12284962	65	292.2	295
AFP2_C1_E_R_D03_62_B_r2.fastq.gz	FASTQ	DNA	42049	12369060	67	294.2	297
AFP2_C1_E_R_D04_92_A_r1.fastq.gz	FASTQ	DNA	26230	7685727	96	293	296
AFP2_C1_E_R_D04_92_A_r2.fastq.gz	FASTQ	DNA	26230	7685727	96	293	296
AFP2_C1_E_R_D04_92_B_r1.fastq.gz	FASTQ	DNA	33341	9758949	144	292.7	295
AFP2_C1_E_R_D04_92_B_r2.fastq.gz	FASTQ	DNA	33341	9825631	146	294.7	297
AFP2_C1_E_R_D05_123_A_r1.fastq.gz	FASTQ	DNA	30610	8999377	85	294	296
AFP2_C1_E_R_D05_123_A_r2.fastq.gz	FASTQ	DNA	30610	8999377	85	294	296
AFP2_C1_E_R_D05_123_B_r1.fastq.gz	FASTQ	DNA	26742	7812527	164	292.1	295
AFP2_C1_E_R_D05_123_B_r2.fastq.gz	FASTQ	DNA	26742	7866011	166	294.1	297
AFP2_C1_E_R_D06_152_A_r1.fastq.gz	FASTQ	DNA	24443	7166954	169	293.2	296
AFP2_C1_E_R_D06_152_A_r2.fastq.gz	FASTQ	DNA	24443	7166954	169	293.2	296
AFP2_C1_E_R_D06_152_B_r1.fastq.gz	FASTQ	DNA	31626	9259353	75	292.8	295
AFP2_C1_E_R_D06_152_B_r2.fastq.gz	FASTQ	DNA	31626	9322605	77	294.8	297
AFP2_C1_E_R_D07_185_A_r1.fastq.gz	FASTQ	DNA	59492	17456034	117	293.4	296
AFP2_C1_E_R_D07_185_A_r2.fastq.gz	FASTQ	DNA	59492	17456034	117	293.4	296
AFP2_C1_E_R_D07_185_B_r1.fastq.gz	FASTQ	DNA	41506	12179615	97	293.4	295
AFP2_C1_E_R_D07_185_B_r2.fastq.gz	FASTQ	DNA	41506	12262627	99	295.4	297
AFP2_C1_E_R_D08_211_A_r1.fastq.gz	FASTQ	DNA	47875	14067076	47	293.8	296
AFP2_C1_E_R_D08_211_A_r2.fastq.gz	FASTQ	DNA	47875	14067076	47	293.8	296
AFP2_C1_E_R_D08_211_B_r1.fastq.gz	FASTQ	DNA	26211	7648407	34	291.8	295
AFP2_C1_E_R_D08_211_B_r2.fastq.gz	FASTQ	DNA	26211	7700829	36	293.8	297
AFP2_C1_E_R_D09_243_A_r1.fastq.gz	FASTQ	DNA	52344	15420849	46	294.6	296
AFP2_C1_E_R_D09_243_A_r2.fastq.gz	FASTQ	DNA	52344	15420849	46	294.6	296
AFP2_C1_E_R_D09_243_B_r1.fastq.gz	FASTQ	DNA	36102	10565903	161	292.7	295
AFP2_C1_E_R_D09_243_B_r2.fastq.gz	FASTQ	DNA	36102	10638107	163	294.7	297
AFP2_C1_E_R_D10_272_A_r1.fastq.gz	FASTQ	DNA	50013	14649756	129	292.9	296
AFP2_C1_E_R_D10_272_A_r2.fastq.gz	FASTQ	DNA	50013	14649756	129	292.9	296
AFP2_C1_E_R_D10_272_B_r1.fastq.gz	FASTQ	DNA	28902	8445927	147	292.2	295
AFP2_C1_E_R_D10_272_B_r2.fastq.gz	FASTQ	DNA	28902	8503731	149	294.2	297
AFP2_C2_E_R_D01_8_A_r1.fastq.gz	FASTQ	DNA	34128	10063732	148	294.9	296
AFP2_C2_E_R_D01_8_A_r2.fastq.gz	FASTQ	DNA	34128	10063732	148	294.9	296
AFP2_C2_E_R_D01_8_B_r1.fastq.gz	FASTQ	DNA	20499	6013370	76	293.3	295
AFP2_C2_E_R_D01_8_B_r2.fastq.gz	FASTQ	DNA	20499	6054368	78	295.3	297
AFP2_C2_E_R_D02_38_A_r1.fastq.gz	FASTQ	DNA	53601	15791542	121	294.6	296
AFP2_C2_E_R_D02_38_A_r2.fastq.gz	FASTQ	DNA	53601	15791542	121	294.6	296
AFP2_C2_E_R_D02_38_B_r1.fastq.gz	FASTQ	DNA	27537	8067040	85	293	295
AFP2_C2_E_R_D02_38_B_r2.fastq.gz	FASTQ	DNA	27537	8122114	87	295	297
AFP2_C2_E_R_D03_67_A_r1.fastq.gz	FASTQ	DNA	33769	9988381	47	295.8	296
AFP2_C2_E_R_D03_67_A_r2.fastq.gz	FASTQ	DNA	33769	9988381	47	295.8	296
AFP2_C2_E_R_D03_67_B_r1.fastq.gz	FASTQ	DNA	43375	12788834	46	294.8	295
AFP2_C2_E_R_D03_67_B_r2.fastq.gz	FASTQ	DNA	43375	12875584	48	296.8	297
AFP2_C2_E_R_D04_97_A_r1.fastq.gz	FASTQ	DNA	35565	10338539	55	290.7	296
AFP2_C2_E_R_D04_97_A_r2.fastq.gz	FASTQ	DNA	35565	10338539	55	290.7	296
AFP2_C2_E_R_D04_97_B_r1.fastq.gz	FASTQ	DNA	43111	12534298	141	290.7	295
AFP2_C2_E_R_D04_97_B_r2.fastq.gz	FASTQ	DNA	43111	12620520	143	292.7	297
AFP2_C2_E_R_D05_128_A_r1.fastq.gz	FASTQ	DNA	43606	12888693	153	295.6	296
AFP2_C2_E_R_D05_128_A_r2.fastq.gz	FASTQ	DNA	43606	12888693	153	295.6	296
AFP2_C2_E_R_D05_128_B_r1.fastq.gz	FASTQ	DNA	42382	12483746	75	294.6	295
AFP2_C2_E_R_D05_128_B_r2.fastq.gz	FASTQ	DNA	42382	12568510	77	296.6	297
AFP2_C2_E_R_D06_156_A_r1.fastq.gz	FASTQ	DNA	34261	10018590	63	292.4	296
AFP2_C2_E_R_D06_156_A_r2.fastq.gz	FASTQ	DNA	34261	10018590	63	292.4	296
AFP2_C2_E_R_D06_156_B_r1.fastq.gz	FASTQ	DNA	38357	11183030	170	291.6	295
AFP2_C2_E_R_D06_156_B_r2.fastq.gz	FASTQ	DNA	38357	11259744	172	293.6	297
AFP2_C2_E_R_D07_189_A_r1.fastq.gz	FASTQ	DNA	54013	15945377	118	295.2	296
AFP2_C2_E_R_D07_189_A_r2.fastq.gz	FASTQ	DNA	54013	15945377	118	295.2	296
AFP2_C2_E_R_D07_189_B_r1.fastq.gz	FASTQ	DNA	45833	13483315	145	294.2	295
AFP2_C2_E_R_D07_189_B_r2.fastq.gz	FASTQ	DNA	45833	13574981	147	296.2	297
AFP2_C2_E_R_D08_217_A_r1.fastq.gz	FASTQ	DNA	32038	9448018	85	294.9	296
AFP2_C2_E_R_D08_217_A_r2.fastq.gz	FASTQ	DNA	32038	9448018	85	294.9	296
AFP2_C2_E_R_D08_217_B_r1.fastq.gz	FASTQ	DNA	23207	6818439	176	293.8	295
AFP2_C2_E_R_D08_217_B_r2.fastq.gz	FASTQ	DNA	23207	6864853	178	295.8	297
AFP2_C2_E_R_D09_250_A_r1.fastq.gz	FASTQ	DNA	45165	13278455	193	294	296
AFP2_C2_E_R_D09_250_A_r2.fastq.gz	FASTQ	DNA	45165	13278455	193	294	296
AFP2_C2_E_R_D09_250_B_r1.fastq.gz	FASTQ	DNA	47534	13930905	126	293.1	295
AFP2_C2_E_R_D09_250_B_r2.fastq.gz	FASTQ	DNA	47534	14025973	128	295.1	297
AFP2_C2_E_R_D10_278_A_r1.fastq.gz	FASTQ	DNA	47228	13818106	142	292.6	296
AFP2_C2_E_R_D10_278_A_r2.fastq.gz	FASTQ	DNA	47228	13818106	142	292.6	296
AFP2_C2_E_R_D10_278_B_r1.fastq.gz	FASTQ	DNA	31407	9118263	137	290.3	295
AFP2_C2_E_R_D10_278_B_r2.fastq.gz	FASTQ	DNA	31407	9181077	139	292.3	297
AFP2_C3_E_R_D01_13_A_r1.fastq.gz	FASTQ	DNA	59976	17524803	125	292.2	296
AFP2_C3_E_R_D01_13_A_r2.fastq.gz	FASTQ	DNA	59976	17524803	125	292.2	296
AFP2_C3_E_R_D01_13_B_r1.fastq.gz	FASTQ	DNA	37760	11032151	60	292.2	295
AFP2_C3_E_R_D01_13_B_r2.fastq.gz	FASTQ	DNA	37760	11107671	62	294.2	297
AFP2_C3_E_R_D02_42_A_r1.fastq.gz	FASTQ	DNA	64871	19059879	127	293.8	296
AFP2_C3_E_R_D02_42_A_r2.fastq.gz	FASTQ	DNA	64871	19059879	127	293.8	296
AFP2_C3_E_R_D02_42_B_r1.fastq.gz	FASTQ	DNA	61621	18007835	151	292.2	295
AFP2_C3_E_R_D02_42_B_r2.fastq.gz	FASTQ	DNA	61621	18131077	153	294.2	297
AFP2_C3_E_R_D03_75_A_r1.fastq.gz	FASTQ	DNA	44223	13038265	57	294.8	296
AFP2_C3_E_R_D03_75_A_r2.fastq.gz	FASTQ	DNA	44223	13038265	57	294.8	296
AFP2_C3_E_R_D03_75_B_r1.fastq.gz	FASTQ	DNA	37270	10903878	172	292.6	295
AFP2_C3_E_R_D03_75_B_r2.fastq.gz	FASTQ	DNA	37270	10978418	174	294.6	297
AFP2_C3_E_R_D04_104_A_r1.fastq.gz	FASTQ	DNA	47632	13936127	52	292.6	296
AFP2_C3_E_R_D04_104_A_r2.fastq.gz	FASTQ	DNA	47632	13936127	52	292.6	296
AFP2_C3_E_R_D04_104_B_r1.fastq.gz	FASTQ	DNA	49789	14612120	151	293.5	295
AFP2_C3_E_R_D04_104_B_r2.fastq.gz	FASTQ	DNA	49789	14711698	153	295.5	297
AFP2_C3_E_R_D05_132_A_r1.fastq.gz	FASTQ	DNA	24169	7140071	61	295.4	296
AFP2_C3_E_R_D05_132_A_r2.fastq.gz	FASTQ	DNA	24169	7140071	61	295.4	296
AFP2_C3_E_R_D05_132_B_r1.fastq.gz	FASTQ	DNA	25057	7371241	219	294.2	295
AFP2_C3_E_R_D05_132_B_r2.fastq.gz	FASTQ	DNA	25057	7421355	221	296.2	297
AFP2_C3_E_R_D06_164_A_r1.fastq.gz	FASTQ	DNA	40873	12081353	47	295.6	296
AFP2_C3_E_R_D06_164_A_r2.fastq.gz	FASTQ	DNA	40873	12081353	47	295.6	296
AFP2_C3_E_R_D06_164_B_r1.fastq.gz	FASTQ	DNA	48447	14283587	158	294.8	295
AFP2_C3_E_R_D06_164_B_r2.fastq.gz	FASTQ	DNA	48447	14380481	160	296.8	297
AFP2_C3_E_R_D07_193_A_r1.fastq.gz	FASTQ	DNA	48617	14348322	64	295.1	296
AFP2_C3_E_R_D07_193_A_r2.fastq.gz	FASTQ	DNA	48617	14348322	64	295.1	296
AFP2_C3_E_R_D07_193_B_r1.fastq.gz	FASTQ	DNA	29416	8613154	212	292.8	295
AFP2_C3_E_R_D07_193_B_r2.fastq.gz	FASTQ	DNA	29416	8671986	214	294.8	297
AFP2_C3_E_R_D08_224_A_r1.fastq.gz	FASTQ	DNA	33317	9823302	47	294.8	296
AFP2_C3_E_R_D08_224_A_r2.fastq.gz	FASTQ	DNA	33317	9823302	47	294.8	296
AFP2_C3_E_R_D08_224_B_r1.fastq.gz	FASTQ	DNA	28979	8533013	191	294.5	295
AFP2_C3_E_R_D08_224_B_r2.fastq.gz	FASTQ	DNA	28979	8590971	193	296.5	297
AFP2_C3_E_R_D09_253_A_r1.fastq.gz	FASTQ	DNA	54937	16125504	29	293.5	296
AFP2_C3_E_R_D09_253_A_r2.fastq.gz	FASTQ	DNA	54937	16125504	29	293.5	296
AFP2_C3_E_R_D09_253_B_r1.fastq.gz	FASTQ	DNA	37735	11026205	187	292.2	295
AFP2_C3_E_R_D09_253_B_r2.fastq.gz	FASTQ	DNA	37735	11101675	189	294.2	297
AFP2_C3_E_R_D10_283_A_r1.fastq.gz	FASTQ	DNA	45062	13241990	99	293.9	296
AFP2_C3_E_R_D10_283_A_r2.fastq.gz	FASTQ	DNA	45062	13241990	99	293.9	296
AFP2_C3_E_R_D10_283_B_r1.fastq.gz	FASTQ	DNA	26988	7905849	168	292.9	295
AFP2_C3_E_R_D10_283_B_r2.fastq.gz	FASTQ	DNA	26988	7959825	170	294.9	297
AFP2_O1_E_R_D01_17_A_r1.fastq.gz	FASTQ	DNA	52189	15346533	47	294.1	296
AFP2_O1_E_R_D01_17_A_r2.fastq.gz	FASTQ	DNA	52189	15346533	47	294.1	296
AFP2_O1_E_R_D01_17_B_r1.fastq.gz	FASTQ	DNA	30890	9044642	103	292.8	295
AFP2_O1_E_R_D01_17_B_r2.fastq.gz	FASTQ	DNA	30890	9106422	105	294.8	297
AFP2_O1_E_R_D02_49_A_r1.fastq.gz	FASTQ	DNA	64054	18917440	201	295.3	296
AFP2_O1_E_R_D02_49_A_r2.fastq.gz	FASTQ	DNA	64054	18917440	201	295.3	296
AFP2_O1_E_R_D02_49_B_r1.fastq.gz	FASTQ	DNA	52068	15317737	139	294.2	295
AFP2_O1_E_R_D02_49_B_r2.fastq.gz	FASTQ	DNA	52068	15421873	141	296.2	297
AFP2_O1_E_R_D03_80_A_r1.fastq.gz	FASTQ	DNA	32025	9394045	167	293.3	296
AFP2_O1_E_R_D03_80_A_r2.fastq.gz	FASTQ	DNA	32025	9394045	167	293.3	296
AFP2_O1_E_R_D03_80_B_r1.fastq.gz	FASTQ	DNA	39119	11399824	158	291.4	295
AFP2_O1_E_R_D03_80_B_r2.fastq.gz	FASTQ	DNA	39119	11478062	160	293.4	297
AFP2_O1_E_R_D04_107_A_r1.fastq.gz	FASTQ	DNA	35554	10456146	47	294.1	296
AFP2_O1_E_R_D04_107_A_r2.fastq.gz	FASTQ	DNA	35554	10456146	47	294.1	296
AFP2_O1_E_R_D04_107_B_r1.fastq.gz	FASTQ	DNA	33310	9731922	201	292.2	295
AFP2_O1_E_R_D04_107_B_r2.fastq.gz	FASTQ	DNA	33310	9798542	203	294.2	297
AFP2_O1_E_R_D05_137_A_r1.fastq.gz	FASTQ	DNA	23140	6824962	216	294.9	296
AFP2_O1_E_R_D05_137_A_r2.fastq.gz	FASTQ	DNA	23140	6824962	216	294.9	296
AFP2_O1_E_R_D05_137_B_r1.fastq.gz	FASTQ	DNA	19841	5830249	161	293.8	295
AFP2_O1_E_R_D05_137_B_r2.fastq.gz	FASTQ	DNA	19841	5869931	163	295.8	297
AFP2_O1_E_R_D06_167_A_r1.fastq.gz	FASTQ	DNA	55264	16158639	189	292.4	296
AFP2_O1_E_R_D06_167_A_r2.fastq.gz	FASTQ	DNA	55264	16158639	189	292.4	296
AFP2_O1_E_R_D06_167_B_r1.fastq.gz	FASTQ	DNA	32134	9381882	230	292	295
AFP2_O1_E_R_D06_167_B_r2.fastq.gz	FASTQ	DNA	32134	9446150	232	294	297
AFP2_O1_E_R_D07_200_A_r1.fastq.gz	FASTQ	DNA	55754	16405857	78	294.3	296
AFP2_O1_E_R_D07_200_A_r2.fastq.gz	FASTQ	DNA	55754	16405857	78	294.3	296
AFP2_O1_E_R_D07_200_B_r1.fastq.gz	FASTQ	DNA	43904	12879484	209	293.4	295
AFP2_O1_E_R_D07_200_B_r2.fastq.gz	FASTQ	DNA	43904	12967292	211	295.4	297
AFP2_O1_E_R_D08_229_A_r1.fastq.gz	FASTQ	DNA	33620	9863810	57	293.4	296
AFP2_O1_E_R_D08_229_A_r2.fastq.gz	FASTQ	DNA	33620	9863810	57	293.4	296
AFP2_O1_E_R_D08_229_B_r1.fastq.gz	FASTQ	DNA	36704	10760678	213	293.2	295
AFP2_O1_E_R_D08_229_B_r2.fastq.gz	FASTQ	DNA	36704	10834086	215	295.2	297
AFP2_O1_E_R_D09_258_A_r1.fastq.gz	FASTQ	DNA	47377	13940369	69	294.2	296
AFP2_O1_E_R_D09_258_A_r2.fastq.gz	FASTQ	DNA	47377	13940369	69	294.2	296
AFP2_O1_E_R_D09_258_B_r1.fastq.gz	FASTQ	DNA	27859	8139871	169	292.2	295
AFP2_O1_E_R_D09_258_B_r2.fastq.gz	FASTQ	DNA	27859	8195589	171	294.2	297
AFP2_O1_E_R_D10_287_A_r1.fastq.gz	FASTQ	DNA	48791	14382957	150	294.8	296
AFP2_O1_E_R_D10_287_A_r2.fastq.gz	FASTQ	DNA	48791	14382957	150	294.8	296
AFP2_O1_E_R_D10_287_B_r1.fastq.gz	FASTQ	DNA	36265	10679520	127	294.5	295
AFP2_O1_E_R_D10_287_B_r2.fastq.gz	FASTQ	DNA	36265	10752050	129	296.5	297
AFP2_O2_E_R_D01_25_A_r1.fastq.gz	FASTQ	DNA	46238	13608900	43	294.3	296
AFP2_O2_E_R_D01_25_A_r2.fastq.gz	FASTQ	DNA	46238	13608900	43	294.3	296
AFP2_O2_E_R_D01_25_B_r1.fastq.gz	FASTQ	DNA	27824	8168970	48	293.6	295
AFP2_O2_E_R_D01_25_B_r2.fastq.gz	FASTQ	DNA	27824	8224618	50	295.6	297
AFP2_O2_E_R_D02_55_A_r1.fastq.gz	FASTQ	DNA	47270	13869178	152	293.4	296
AFP2_O2_E_R_D02_55_A_r2.fastq.gz	FASTQ	DNA	47270	13869178	152	293.4	296
AFP2_O2_E_R_D02_55_B_r1.fastq.gz	FASTQ	DNA	40133	11720010	117	292	295
AFP2_O2_E_R_D02_55_B_r2.fastq.gz	FASTQ	DNA	40133	11800276	119	294	297
AFP2_O2_E_R_D03_81_A_r1.fastq.gz	FASTQ	DNA	31513	9235756	193	293.1	296
AFP2_O2_E_R_D03_81_A_r2.fastq.gz	FASTQ	DNA	31513	9235756	193	293.1	296
AFP2_O2_E_R_D03_81_B_r1.fastq.gz	FASTQ	DNA	44761	13118855	175	293.1	295
AFP2_O2_E_R_D03_81_B_r2.fastq.gz	FASTQ	DNA	44761	13208377	177	295.1	297
AFP2_O2_E_R_D04_112_A_r1.fastq.gz	FASTQ	DNA	47781	14057460	48	294.2	296
AFP2_O2_E_R_D04_112_A_r2.fastq.gz	FASTQ	DNA	47781	14057460	48	294.2	296
AFP2_O2_E_R_D04_112_B_r1.fastq.gz	FASTQ	DNA	33928	9948949	240	293.2	295
AFP2_O2_E_R_D04_112_B_r2.fastq.gz	FASTQ	DNA	33928	10016805	242	295.2	297
AFP2_O2_E_R_D05_143_A_r1.fastq.gz	FASTQ	DNA	35848	10575282	113	295	296
AFP2_O2_E_R_D05_143_A_r2.fastq.gz	FASTQ	DNA	35848	10575282	113	295	296
AFP2_O2_E_R_D05_143_B_r1.fastq.gz	FASTQ	DNA	25033	7354091	201	293.8	295
AFP2_O2_E_R_D05_143_B_r2.fastq.gz	FASTQ	DNA	25033	7404157	203	295.8	297
AFP2_O2_E_R_D06_174_A_r1.fastq.gz	FASTQ	DNA	71080	20991391	101	295.3	296
AFP2_O2_E_R_D06_174_A_r2.fastq.gz	FASTQ	DNA	71080	20991391	101	295.3	296
AFP2_O2_E_R_D06_174_B_r1.fastq.gz	FASTQ	DNA	49262	14453625	46	293.4	295
AFP2_O2_E_R_D06_174_B_r2.fastq.gz	FASTQ	DNA	49262	14552149	48	295.4	297
AFP2_O2_E_R_D07_204_A_r1.fastq.gz	FASTQ	DNA	51351	14945055	87	291	296
AFP2_O2_E_R_D07_204_A_r2.fastq.gz	FASTQ	DNA	51351	14945055	87	291	296
AFP2_O2_E_R_D07_204_B_r1.fastq.gz	FASTQ	DNA	44777	13111791	160	292.8	295
AFP2_O2_E_R_D07_204_B_r2.fastq.gz	FASTQ	DNA	44777	13201345	162	294.8	297
AFP2_O2_E_R_D08_235_A_r1.fastq.gz	FASTQ	DNA	41192	12099443	64	293.7	296
AFP2_O2_E_R_D08_235_A_r2.fastq.gz	FASTQ	DNA	41192	12099443	64	293.7	296
AFP2_O2_E_R_D08_235_B_r1.fastq.gz	FASTQ	DNA	46438	13598359	174	292.8	295
AFP2_O2_E_R_D08_235_B_r2.fastq.gz	FASTQ	DNA	46438	13691235	176	294.8	297
AFP2_O2_E_R_D09_262_A_r1.fastq.gz	FASTQ	DNA	38905	11405494	47	293.2	296
AFP2_O2_E_R_D09_262_A_r2.fastq.gz	FASTQ	DNA	38905	11405494	47	293.2	296
AFP2_O2_E_R_D09_262_B_r1.fastq.gz	FASTQ	DNA	30051	8814327	93	293.3	295
AFP2_O2_E_R_D09_262_B_r2.fastq.gz	FASTQ	DNA	30051	8874429	95	295.3	297
AFP2_O2_E_R_D10_292_A_r1.fastq.gz	FASTQ	DNA	35072	10198944	101	290.8	296
AFP2_O2_E_R_D10_292_A_r2.fastq.gz	FASTQ	DNA	35072	10198944	101	290.8	296
AFP2_O2_E_R_D10_292_B_r1.fastq.gz	FASTQ	DNA	25091	7365627	223	293.6	295
AFP2_O2_E_R_D10_292_B_r2.fastq.gz	FASTQ	DNA	25091	7415809	225	295.6	297
AFP2_O3_E_R_D01_30_A_r1.fastq.gz	FASTQ	DNA	53771	15752522	79	293	296
AFP2_O3_E_R_D01_30_A_r2.fastq.gz	FASTQ	DNA	53771	15752522	79	293	296
AFP2_O3_E_R_D01_30_B_r1.fastq.gz	FASTQ	DNA	28394	8310682	108	292.7	295
AFP2_O3_E_R_D01_30_B_r2.fastq.gz	FASTQ	DNA	28394	8367470	110	294.7	297
AFP2_O3_E_R_D02_59_A_r1.fastq.gz	FASTQ	DNA	30647	9017038	189	294.2	296
AFP2_O3_E_R_D02_59_A_r2.fastq.gz	FASTQ	DNA	30647	9017038	189	294.2	296
AFP2_O3_E_R_D02_59_B_r1.fastq.gz	FASTQ	DNA	37664	11012396	124	292.4	295
AFP2_O3_E_R_D02_59_B_r2.fastq.gz	FASTQ	DNA	37664	11087724	126	294.4	297
AFP2_O3_E_R_D03_87_A_r1.fastq.gz	FASTQ	DNA	34720	10144125	109	292.2	296
AFP2_O3_E_R_D03_87_A_r2.fastq.gz	FASTQ	DNA	34720	10144125	109	292.2	296
AFP2_O3_E_R_D03_87_B_r1.fastq.gz	FASTQ	DNA	47407	13923084	116	293.7	295
AFP2_O3_E_R_D03_87_B_r2.fastq.gz	FASTQ	DNA	47407	14017898	118	295.7	297
AFP2_O3_E_R_D04_118_A_r1.fastq.gz	FASTQ	DNA	35803	10562066	93	295	296
AFP2_O3_E_R_D04_118_A_r2.fastq.gz	FASTQ	DNA	35803	10562066	93	295	296
AFP2_O3_E_R_D04_118_B_r1.fastq.gz	FASTQ	DNA	23266	6800192	190	292.3	295
AFP2_O3_E_R_D04_118_B_r2.fastq.gz	FASTQ	DNA	23266	6846724	192	294.3	297
AFP2_O3_E_R_D05_149_A_r1.fastq.gz	FASTQ	DNA	23389	6809021	51	291.1	296
AFP2_O3_E_R_D05_149_A_r2.fastq.gz	FASTQ	DNA	23389	6809021	51	291.1	296
AFP2_O3_E_R_D05_149_B_r1.fastq.gz	FASTQ	DNA	31124	9023777	75	289.9	295
AFP2_O3_E_R_D05_149_B_r2.fastq.gz	FASTQ	DNA	31124	9086025	77	291.9	297
AFP2_O3_E_R_D06_179_A_r1.fastq.gz	FASTQ	DNA	39628	11561423	143	291.7	296
AFP2_O3_E_R_D06_179_A_r2.fastq.gz	FASTQ	DNA	39628	11561423	143	291.7	296
AFP2_O3_E_R_D06_179_B_r1.fastq.gz	FASTQ	DNA	30384	8917940	119	293.5	295
AFP2_O3_E_R_D06_179_B_r2.fastq.gz	FASTQ	DNA	30384	8978708	121	295.5	297
AFP2_O3_E_R_D07_209_A_r1.fastq.gz	FASTQ	DNA	38382	11273446	59	293.7	296
AFP2_O3_E_R_D07_209_A_r2.fastq.gz	FASTQ	DNA	38382	11273446	59	293.7	296
AFP2_O3_E_R_D07_209_B_r1.fastq.gz	FASTQ	DNA	48190	14103583	258	292.7	295
AFP2_O3_E_R_D07_209_B_r2.fastq.gz	FASTQ	DNA	48190	14199963	260	294.7	297
AFP2_O3_E_R_D08_236_A_r1.fastq.gz	FASTQ	DNA	45929	13590214	148	295.9	296
AFP2_O3_E_R_D08_236_A_r2.fastq.gz	FASTQ	DNA	45929	13590214	148	295.9	296
AFP2_O3_E_R_D08_236_B_r1.fastq.gz	FASTQ	DNA	22197	6546930	236	294.9	295
AFP2_O3_E_R_D08_236_B_r2.fastq.gz	FASTQ	DNA	22197	6591324	238	296.9	297
AFP2_O3_E_R_D09_269_A_r1.fastq.gz	FASTQ	DNA	47489	14035293	96	295.5	296
AFP2_O3_E_R_D09_269_A_r2.fastq.gz	FASTQ	DNA	47489	14035293	96	295.5	296
AFP2_O3_E_R_D09_269_B_r1.fastq.gz	FASTQ	DNA	33604	9872085	175	293.8	295
AFP2_O3_E_R_D09_269_B_r2.fastq.gz	FASTQ	DNA	33604	9939293	177	295.8	297
AFP2_O3_E_R_D10_297_A_r1.fastq.gz	FASTQ	DNA	44742	13135355	169	293.6	296
AFP2_O3_E_R_D10_297_A_r2.fastq.gz	FASTQ	DNA	44742	13135355	169	293.6	296
AFP2_O3_E_R_D10_297_B_r1.fastq.gz	FASTQ	DNA	27649	8089142	228	292.6	295
AFP2_O3_E_R_D10_297_B_r2.fastq.gz	FASTQ	DNA	27649	8144440	230	294.6	297

## Sheet: 16S
16S amplicon
file	format	type	num_seqs	sum_len	min_len	avg_len	max_len
AFP2_C1_E_R_D01_2_A_r1.fastq.gz	FASTQ	DNA	1318391	324318405	54	246	246
AFP2_C1_E_R_D01_2_A_r2.fastq.gz	FASTQ	DNA	1318391	324318405	54	246	246
AFP2_C1_E_R_D01_2_B_r1.fastq.gz	FASTQ	DNA	1277599	312999065	62	245	245
AFP2_C1_E_R_D01_2_B_r2.fastq.gz	FASTQ	DNA	1277599	315554263	64	247	247
AFP2_C1_E_R_D02_35_A_r1.fastq.gz	FASTQ	DNA	1092176	268671768	63	246	246
AFP2_C1_E_R_D02_35_A_r2.fastq.gz	FASTQ	DNA	1092176	268671768	63	246	246
AFP2_C1_E_R_D02_35_B_r1.fastq.gz	FASTQ	DNA	835182	204615395	62	245	245
AFP2_C1_E_R_D02_35_B_r2.fastq.gz	FASTQ	DNA	835182	206285759	64	247	247
AFP2_C1_E_R_D03_62_A_r1.fastq.gz	FASTQ	DNA	1060770	260943498	63	246	246
AFP2_C1_E_R_D03_62_A_r2.fastq.gz	FASTQ	DNA	1060770	260943498	63	246	246
AFP2_C1_E_R_D03_62_B_r1.fastq.gz	FASTQ	DNA	705101	172743736	101	245	245
AFP2_C1_E_R_D03_62_B_r2.fastq.gz	FASTQ	DNA	705101	174153938	103	247	247
AFP2_C1_E_R_D04_92_A_r1.fastq.gz	FASTQ	DNA	901933	221869792	63	246	246
AFP2_C1_E_R_D04_92_A_r2.fastq.gz	FASTQ	DNA	901933	221869792	63	246	246
AFP2_C1_E_R_D04_92_B_r1.fastq.gz	FASTQ	DNA	492973	120774787	62	245	245
AFP2_C1_E_R_D04_92_B_r2.fastq.gz	FASTQ	DNA	492973	121760733	64	247	247
AFP2_C1_E_R_D05_123_A_r1.fastq.gz	FASTQ	DNA	696683	171381626	103	246	246
AFP2_C1_E_R_D05_123_A_r2.fastq.gz	FASTQ	DNA	696683	171381626	103	246	246
AFP2_C1_E_R_D05_123_B_r1.fastq.gz	FASTQ	DNA	813098	199204407	62	245	245
AFP2_C1_E_R_D05_123_B_r2.fastq.gz	FASTQ	DNA	813098	200830603	64	247	247
AFP2_C1_E_R_D06_152_A_r1.fastq.gz	FASTQ	DNA	723141	177889551	63	246	246
AFP2_C1_E_R_D06_152_A_r2.fastq.gz	FASTQ	DNA	723141	177889551	63	246	246
AFP2_C1_E_R_D06_152_B_r1.fastq.gz	FASTQ	DNA	771414	188990787	62	245	245
AFP2_C1_E_R_D06_152_B_r2.fastq.gz	FASTQ	DNA	771414	190533615	64	247	247
AFP2_C1_E_R_D07_185_A_r1.fastq.gz	FASTQ	DNA	1140149	280470735	63	246	246
AFP2_C1_E_R_D07_185_A_r2.fastq.gz	FASTQ	DNA	1140149	280470735	63	246	246
AFP2_C1_E_R_D07_185_B_r1.fastq.gz	FASTQ	DNA	800741	196175025	102	245	245
AFP2_C1_E_R_D07_185_B_r2.fastq.gz	FASTQ	DNA	800741	197776507	104	247	247
AFP2_C1_E_R_D08_211_A_r1.fastq.gz	FASTQ	DNA	975482	239964339	63	246	246
AFP2_C1_E_R_D08_211_A_r2.fastq.gz	FASTQ	DNA	975482	239964339	63	246	246
AFP2_C1_E_R_D08_211_B_r1.fastq.gz	FASTQ	DNA	791287	193860561	62	245	245
AFP2_C1_E_R_D08_211_B_r2.fastq.gz	FASTQ	DNA	791287	195443135	64	247	247
AFP2_C1_E_R_D09_243_A_r1.fastq.gz	FASTQ	DNA	869309	213845868	27	246	246
AFP2_C1_E_R_D09_243_A_r2.fastq.gz	FASTQ	DNA	869309	213845868	27	246	246
AFP2_C1_E_R_D09_243_B_r1.fastq.gz	FASTQ	DNA	936853	229522961	102	245	245
AFP2_C1_E_R_D09_243_B_r2.fastq.gz	FASTQ	DNA	936853	231396667	104	247	247
AFP2_C1_E_R_D10_272_A_r1.fastq.gz	FASTQ	DNA	1129684	277897266	63	246	246
AFP2_C1_E_R_D10_272_A_r2.fastq.gz	FASTQ	DNA	1129684	277897266	63	246	246
AFP2_C1_E_R_D10_272_B_r1.fastq.gz	FASTQ	DNA	532315	130414052	102	245	245
AFP2_C1_E_R_D10_272_B_r2.fastq.gz	FASTQ	DNA	532315	131478682	104	247	247
AFP2_C2_E_R_D01_8_A_r1.fastq.gz	FASTQ	DNA	996498	245134278	63	246	246
AFP2_C2_E_R_D01_8_A_r2.fastq.gz	FASTQ	DNA	996498	245134278	63	246	246
AFP2_C2_E_R_D01_8_B_r1.fastq.gz	FASTQ	DNA	1001500	245361782	62	245	245
AFP2_C2_E_R_D01_8_B_r2.fastq.gz	FASTQ	DNA	1001500	247364782	64	247	247
AFP2_C2_E_R_D02_38_A_r1.fastq.gz	FASTQ	DNA	1145197	281711928	27	246	246
AFP2_C2_E_R_D02_38_A_r2.fastq.gz	FASTQ	DNA	1145197	281711928	27	246	246
AFP2_C2_E_R_D02_38_B_r1.fastq.gz	FASTQ	DNA	926910	227084294	89	245	245
AFP2_C2_E_R_D02_38_B_r2.fastq.gz	FASTQ	DNA	926910	228938114	91	247	247
AFP2_C2_E_R_D03_67_A_r1.fastq.gz	FASTQ	DNA	986809	242751410	92	246	246
AFP2_C2_E_R_D03_67_A_r2.fastq.gz	FASTQ	DNA	986809	242751410	92	246	246
AFP2_C2_E_R_D03_67_B_r1.fastq.gz	FASTQ	DNA	778224	190661795	26	245	245
AFP2_C2_E_R_D03_67_B_r2.fastq.gz	FASTQ	DNA	778224	192218243	28	247	247
AFP2_C2_E_R_D04_97_A_r1.fastq.gz	FASTQ	DNA	987963	243034294	103	246	246
AFP2_C2_E_R_D04_97_A_r2.fastq.gz	FASTQ	DNA	987963	243034294	103	246	246
AFP2_C2_E_R_D04_97_B_r1.fastq.gz	FASTQ	DNA	809206	198248274	62	245	245
AFP2_C2_E_R_D04_97_B_r2.fastq.gz	FASTQ	DNA	809206	199866686	64	247	247
AFP2_C2_E_R_D05_128_A_r1.fastq.gz	FASTQ	DNA	872699	214680111	63	246	246
AFP2_C2_E_R_D05_128_A_r2.fastq.gz	FASTQ	DNA	872699	214680111	63	246	246
AFP2_C2_E_R_D05_128_B_r1.fastq.gz	FASTQ	DNA	976113	239139482	62	245	245
AFP2_C2_E_R_D05_128_B_r2.fastq.gz	FASTQ	DNA	976113	241091708	64	247	247
AFP2_C2_E_R_D06_156_A_r1.fastq.gz	FASTQ	DNA	696863	171424836	63	246	246
AFP2_C2_E_R_D06_156_A_r2.fastq.gz	FASTQ	DNA	696863	171424836	63	246	246
AFP2_C2_E_R_D06_156_B_r1.fastq.gz	FASTQ	DNA	660280	161763429	58	245	245
AFP2_C2_E_R_D06_156_B_r2.fastq.gz	FASTQ	DNA	660280	163083989	60	247	247
AFP2_C2_E_R_D07_189_A_r1.fastq.gz	FASTQ	DNA	1001870	246454106	63	246	246
AFP2_C2_E_R_D07_189_A_r2.fastq.gz	FASTQ	DNA	1001870	246454106	63	246	246
AFP2_C2_E_R_D07_189_B_r1.fastq.gz	FASTQ	DNA	1242331	304362465	63	245	245
AFP2_C2_E_R_D07_189_B_r2.fastq.gz	FASTQ	DNA	1242331	306847127	65	247	247
AFP2_C2_E_R_D08_217_A_r1.fastq.gz	FASTQ	DNA	1039944	255821100	63	246	246
AFP2_C2_E_R_D08_217_A_r2.fastq.gz	FASTQ	DNA	1039944	255821100	63	246	246
AFP2_C2_E_R_D08_217_B_r1.fastq.gz	FASTQ	DNA	1013532	248309500	62	245	245
AFP2_C2_E_R_D08_217_B_r2.fastq.gz	FASTQ	DNA	1013532	250336564	64	247	247
AFP2_C2_E_R_D09_250_A_r1.fastq.gz	FASTQ	DNA	834505	205282912	63	246	246
AFP2_C2_E_R_D09_250_A_r2.fastq.gz	FASTQ	DNA	834505	205282912	63	246	246
AFP2_C2_E_R_D09_250_B_r1.fastq.gz	FASTQ	DNA	727594	178254477	62	245	245
AFP2_C2_E_R_D09_250_B_r2.fastq.gz	FASTQ	DNA	727594	179709665	64	247	247
AFP2_C2_E_R_D10_278_A_r1.fastq.gz	FASTQ	DNA	1039316	255667242	63	246	246
AFP2_C2_E_R_D10_278_A_r2.fastq.gz	FASTQ	DNA	1039316	255667242	63	246	246
AFP2_C2_E_R_D10_278_B_r1.fastq.gz	FASTQ	DNA	751494	184111189	61	245	245
AFP2_C2_E_R_D10_278_B_r2.fastq.gz	FASTQ	DNA	751494	185614177	63	247	247
AFP2_C3_E_R_D01_13_A_r1.fastq.gz	FASTQ	DNA	1201847	295650119	95	246	246
AFP2_C3_E_R_D01_13_A_r2.fastq.gz	FASTQ	DNA	1201847	295650119	95	246	246
AFP2_C3_E_R_D01_13_B_r1.fastq.gz	FASTQ	DNA	1307187	320253225	62	245	245
AFP2_C3_E_R_D01_13_B_r2.fastq.gz	FASTQ	DNA	1307187	322867599	64	247	247
AFP2_C3_E_R_D02_42_A_r1.fastq.gz	FASTQ	DNA	1398673	344068195	63	246	246
AFP2_C3_E_R_D02_42_A_r2.fastq.gz	FASTQ	DNA	1398673	344068195	63	246	246
AFP2_C3_E_R_D02_42_B_r1.fastq.gz	FASTQ	DNA	1228409	300952385	62	245	245
AFP2_C3_E_R_D02_42_B_r2.fastq.gz	FASTQ	DNA	1228409	303409203	64	247	247
AFP2_C3_E_R_D03_75_A_r1.fastq.gz	FASTQ	DNA	1145899	281886252	63	246	246
AFP2_C3_E_R_D03_75_A_r2.fastq.gz	FASTQ	DNA	1145899	281886252	63	246	246
AFP2_C3_E_R_D03_75_B_r1.fastq.gz	FASTQ	DNA	892836	218737368	62	245	245
AFP2_C3_E_R_D03_75_B_r2.fastq.gz	FASTQ	DNA	892836	220523040	64	247	247
AFP2_C3_E_R_D04_104_A_r1.fastq.gz	FASTQ	DNA	1099876	270565267	95	246	246
AFP2_C3_E_R_D04_104_A_r2.fastq.gz	FASTQ	DNA	1099876	270565267	95	246	246
AFP2_C3_E_R_D04_104_B_r1.fastq.gz	FASTQ	DNA	831249	203652202	137	245	245
AFP2_C3_E_R_D04_104_B_r2.fastq.gz	FASTQ	DNA	831249	205314700	139	247	247
AFP2_C3_E_R_D05_132_A_r1.fastq.gz	FASTQ	DNA	505970	124466909	63	246	246
AFP2_C3_E_R_D05_132_A_r2.fastq.gz	FASTQ	DNA	505970	124466909	63	246	246
AFP2_C3_E_R_D05_132_B_r1.fastq.gz	FASTQ	DNA	669573	164040388	62	245	245
AFP2_C3_E_R_D05_132_B_r2.fastq.gz	FASTQ	DNA	669573	165379534	64	247	247
AFP2_C3_E_R_D06_164_A_r1.fastq.gz	FASTQ	DNA	526967	129631712	124	246	246
AFP2_C3_E_R_D06_164_A_r2.fastq.gz	FASTQ	DNA	526967	129631712	124	246	246
AFP2_C3_E_R_D06_164_B_r1.fastq.gz	FASTQ	DNA	1101894	269959730	62	245	245
AFP2_C3_E_R_D06_164_B_r2.fastq.gz	FASTQ	DNA	1101894	272163518	64	247	247
AFP2_C3_E_R_D07_193_A_r1.fastq.gz	FASTQ	DNA	919695	226241276	103	246	246
AFP2_C3_E_R_D07_193_A_r2.fastq.gz	FASTQ	DNA	919695	226241276	103	246	246
AFP2_C3_E_R_D07_193_B_r1.fastq.gz	FASTQ	DNA	929534	227729967	121	245	245
AFP2_C3_E_R_D07_193_B_r2.fastq.gz	FASTQ	DNA	929534	229589035	123	247	247
AFP2_C3_E_R_D08_224_A_r1.fastq.gz	FASTQ	DNA	734806	180757703	27	246	246
AFP2_C3_E_R_D08_224_A_r2.fastq.gz	FASTQ	DNA	734806	180757703	27	246	246
AFP2_C3_E_R_D08_224_B_r1.fastq.gz	FASTQ	DNA	676821	165816682	61	245	245
AFP2_C3_E_R_D08_224_B_r2.fastq.gz	FASTQ	DNA	676821	167170324	63	247	247
AFP2_C3_E_R_D09_253_A_r1.fastq.gz	FASTQ	DNA	1011519	248829407	63	246	246
AFP2_C3_E_R_D09_253_A_r2.fastq.gz	FASTQ	DNA	1011519	248829407	63	246	246
AFP2_C3_E_R_D09_253_B_r1.fastq.gz	FASTQ	DNA	863377	211521350	62	245	245
AFP2_C3_E_R_D09_253_B_r2.fastq.gz	FASTQ	DNA	863377	213248104	64	247	247
AFP2_C3_E_R_D10_283_A_r1.fastq.gz	FASTQ	DNA	983638	241971347	63	246	246
AFP2_C3_E_R_D10_283_A_r2.fastq.gz	FASTQ	DNA	983638	241971347	63	246	246
AFP2_C3_E_R_D10_283_B_r1.fastq.gz	FASTQ	DNA	820293	200965805	62	245	245
AFP2_C3_E_R_D10_283_B_r2.fastq.gz	FASTQ	DNA	820293	202606391	64	247	247
AFP2_O1_E_R_D01_17_A_r1.fastq.gz	FASTQ	DNA	1029760	253315140	27	246	246
AFP2_O1_E_R_D01_17_A_r2.fastq.gz	FASTQ	DNA	1029760	253315140	27	246	246
AFP2_O1_E_R_D01_17_B_r1.fastq.gz	FASTQ	DNA	1116054	273426556	62	245	245
AFP2_O1_E_R_D01_17_B_r2.fastq.gz	FASTQ	DNA	1116054	275658664	64	247	247
AFP2_O1_E_R_D02_49_A_r1.fastq.gz	FASTQ	DNA	1226417	301693077	63	246	246
AFP2_O1_E_R_D02_49_A_r2.fastq.gz	FASTQ	DNA	1226417	301693077	63	246	246
AFP2_O1_E_R_D02_49_B_r1.fastq.gz	FASTQ	DNA	1355915	332190062	62	245	245
AFP2_O1_E_R_D02_49_B_r2.fastq.gz	FASTQ	DNA	1355915	334901892	64	247	247
AFP2_O1_E_R_D03_80_A_r1.fastq.gz	FASTQ	DNA	938608	230894850	61	246	246
AFP2_O1_E_R_D03_80_A_r2.fastq.gz	FASTQ	DNA	938608	230894850	61	246	246
AFP2_O1_E_R_D03_80_B_r1.fastq.gz	FASTQ	DNA	804703	197147323	106	245	245
AFP2_O1_E_R_D03_80_B_r2.fastq.gz	FASTQ	DNA	804703	198756729	108	247	247
AFP2_O1_E_R_D04_107_A_r1.fastq.gz	FASTQ	DNA	825341	203030283	84	246	246
AFP2_O1_E_R_D04_107_A_r2.fastq.gz	FASTQ	DNA	825341	203030283	84	246	246
AFP2_O1_E_R_D04_107_B_r1.fastq.gz	FASTQ	DNA	668522	163784196	102	245	245
AFP2_O1_E_R_D04_107_B_r2.fastq.gz	FASTQ	DNA	668522	165121240	104	247	247
AFP2_O1_E_R_D05_137_A_r1.fastq.gz	FASTQ	DNA	482647	118729298	63	246	246
AFP2_O1_E_R_D05_137_A_r2.fastq.gz	FASTQ	DNA	482647	118729298	63	246	246
AFP2_O1_E_R_D05_137_B_r1.fastq.gz	FASTQ	DNA	972089	238154128	62	245	245
AFP2_O1_E_R_D05_137_B_r2.fastq.gz	FASTQ	DNA	972089	240098306	64	247	247
AFP2_O1_E_R_D06_167_A_r1.fastq.gz	FASTQ	DNA	533315	131194032	89	246	246
AFP2_O1_E_R_D06_167_A_r2.fastq.gz	FASTQ	DNA	533315	131194032	89	246	246
AFP2_O1_E_R_D06_167_B_r1.fastq.gz	FASTQ	DNA	427744	104794504	62	245	245
AFP2_O1_E_R_D06_167_B_r2.fastq.gz	FASTQ	DNA	427744	105649992	64	247	247
AFP2_O1_E_R_D07_200_A_r1.fastq.gz	FASTQ	DNA	854687	210249708	63	246	246
AFP2_O1_E_R_D07_200_A_r2.fastq.gz	FASTQ	DNA	854687	210249708	63	246	246
AFP2_O1_E_R_D07_200_B_r1.fastq.gz	FASTQ	DNA	874084	214144721	62	245	245
AFP2_O1_E_R_D07_200_B_r2.fastq.gz	FASTQ	DNA	874084	215892889	64	247	247
AFP2_O1_E_R_D08_229_A_r1.fastq.gz	FASTQ	DNA	749042	184261662	63	246	246
AFP2_O1_E_R_D08_229_A_r2.fastq.gz	FASTQ	DNA	749042	184261662	63	246	246
AFP2_O1_E_R_D08_229_B_r1.fastq.gz	FASTQ	DNA	893949	219011270	102	245	245
AFP2_O1_E_R_D08_229_B_r2.fastq.gz	FASTQ	DNA	893949	220799168	104	247	247
AFP2_O1_E_R_D09_258_A_r1.fastq.gz	FASTQ	DNA	836356	205737233	63	246	246
AFP2_O1_E_R_D09_258_A_r2.fastq.gz	FASTQ	DNA	836356	205737233	63	246	246
AFP2_O1_E_R_D09_258_B_r1.fastq.gz	FASTQ	DNA	708176	173498286	62	245	245
AFP2_O1_E_R_D09_258_B_r2.fastq.gz	FASTQ	DNA	708176	174914638	64	247	247
AFP2_O1_E_R_D10_287_A_r1.fastq.gz	FASTQ	DNA	1420967	349552085	63	246	246
AFP2_O1_E_R_D10_287_A_r2.fastq.gz	FASTQ	DNA	1420967	349552085	63	246	246
AFP2_O1_E_R_D10_287_B_r1.fastq.gz	FASTQ	DNA	1243084	304547635	60	245	245
AFP2_O1_E_R_D10_287_B_r2.fastq.gz	FASTQ	DNA	1243084	307033803	62	247	247
AFP2_O2_E_R_D01_25_A_r1.fastq.gz	FASTQ	DNA	826775	203382490	27	246	246
AFP2_O2_E_R_D01_25_A_r2.fastq.gz	FASTQ	DNA	826775	203382490	27	246	246
AFP2_O2_E_R_D01_25_B_r1.fastq.gz	FASTQ	DNA	832513	203960669	94	245	245
AFP2_O2_E_R_D01_25_B_r2.fastq.gz	FASTQ	DNA	832513	205625695	96	247	247
AFP2_O2_E_R_D02_55_A_r1.fastq.gz	FASTQ	DNA	816974	200971123	26	246	246
AFP2_O2_E_R_D02_55_A_r2.fastq.gz	FASTQ	DNA	816974	200971123	26	246	246
AFP2_O2_E_R_D02_55_B_r1.fastq.gz	FASTQ	DNA	660140	161729025	62	245	245
AFP2_O2_E_R_D02_55_B_r2.fastq.gz	FASTQ	DNA	660140	163049305	64	247	247
AFP2_O2_E_R_D03_81_A_r1.fastq.gz	FASTQ	DNA	1038687	255511297	63	246	246
AFP2_O2_E_R_D03_81_A_r2.fastq.gz	FASTQ	DNA	1038687	255511297	63	246	246
AFP2_O2_E_R_D03_81_B_r1.fastq.gz	FASTQ	DNA	561173	137484174	62	245	245
AFP2_O2_E_R_D03_81_B_r2.fastq.gz	FASTQ	DNA	561173	138606520	64	247	247
AFP2_O2_E_R_D04_112_A_r1.fastq.gz	FASTQ	DNA	1106676	272237203	63	246	246
AFP2_O2_E_R_D04_112_A_r2.fastq.gz	FASTQ	DNA	1106676	272237203	63	246	246
AFP2_O2_E_R_D04_112_B_r1.fastq.gz	FASTQ	DNA	755042	184981048	106	245	245
AFP2_O2_E_R_D04_112_B_r2.fastq.gz	FASTQ	DNA	755042	186491132	108	247	247
AFP2_O2_E_R_D05_143_A_r1.fastq.gz	FASTQ	DNA	602555	148225597	63	246	246
AFP2_O2_E_R_D05_143_A_r2.fastq.gz	FASTQ	DNA	602555	148225597	63	246	246
AFP2_O2_E_R_D05_143_B_r1.fastq.gz	FASTQ	DNA	618440	151513782	108	245	245
AFP2_O2_E_R_D05_143_B_r2.fastq.gz	FASTQ	DNA	618440	152750662	110	247	247
AFP2_O2_E_R_D06_174_A_r1.fastq.gz	FASTQ	DNA	1475276	362909935	63	246	246
AFP2_O2_E_R_D06_174_A_r2.fastq.gz	FASTQ	DNA	1475276	362909935	63	246	246
AFP2_O2_E_R_D06_174_B_r1.fastq.gz	FASTQ	DNA	1263680	309593771	62	245	245
AFP2_O2_E_R_D06_174_B_r2.fastq.gz	FASTQ	DNA	1263680	312121131	64	247	247
AFP2_O2_E_R_D07_204_A_r1.fastq.gz	FASTQ	DNA	920773	226500618	63	246	246
AFP2_O2_E_R_D07_204_A_r2.fastq.gz	FASTQ	DNA	920773	226500618	63	246	246
AFP2_O2_E_R_D07_204_B_r1.fastq.gz	FASTQ	DNA	1045379	256107805	15	245	245
AFP2_O2_E_R_D07_204_B_r2.fastq.gz	FASTQ	DNA	1045379	258198563	17	247	247
AFP2_O2_E_R_D08_235_A_r1.fastq.gz	FASTQ	DNA	1093420	268970698	21	246	246
AFP2_O2_E_R_D08_235_A_r2.fastq.gz	FASTQ	DNA	1093420	268970698	21	246	246
AFP2_O2_E_R_D08_235_B_r1.fastq.gz	FASTQ	DNA	1322758	324064649	62	245	245
AFP2_O2_E_R_D08_235_B_r2.fastq.gz	FASTQ	DNA	1322758	326710165	64	247	247
AFP2_O2_E_R_D09_262_A_r1.fastq.gz	FASTQ	DNA	871107	214288898	122	246	246
AFP2_O2_E_R_D09_262_A_r2.fastq.gz	FASTQ	DNA	871107	214288898	122	246	246
AFP2_O2_E_R_D09_262_B_r1.fastq.gz	FASTQ	DNA	623586	152774467	35	245	245
AFP2_O2_E_R_D09_262_B_r2.fastq.gz	FASTQ	DNA	623586	154021639	37	247	247
AFP2_O2_E_R_D10_292_A_r1.fastq.gz	FASTQ	DNA	951126	233973166	63	246	246
AFP2_O2_E_R_D10_292_A_r2.fastq.gz	FASTQ	DNA	951126	233973166	63	246	246
AFP2_O2_E_R_D10_292_B_r1.fastq.gz	FASTQ	DNA	595829	145974576	62	245	245
AFP2_O2_E_R_D10_292_B_r2.fastq.gz	FASTQ	DNA	595829	147166234	64	247	247
AFP2_O3_E_R_D01_30_A_r1.fastq.gz	FASTQ	DNA	1144731	281598135	50	246	246
AFP2_O3_E_R_D01_30_A_r2.fastq.gz	FASTQ	DNA	1144731	281598135	50	246	246
AFP2_O3_E_R_D01_30_B_r1.fastq.gz	FASTQ	DNA	1193832	292479398	62	245	245
AFP2_O3_E_R_D01_30_B_r2.fastq.gz	FASTQ	DNA	1193832	294867062	64	247	247
AFP2_O3_E_R_D02_59_A_r1.fastq.gz	FASTQ	DNA	878124	216013496	63	246	246
AFP2_O3_E_R_D02_59_A_r2.fastq.gz	FASTQ	DNA	878124	216013496	63	246	246
AFP2_O3_E_R_D02_59_B_r1.fastq.gz	FASTQ	DNA	752457	184346916	112	245	245
AFP2_O3_E_R_D02_59_B_r2.fastq.gz	FASTQ	DNA	752457	185851830	114	247	247
AFP2_O3_E_R_D03_87_A_r1.fastq.gz	FASTQ	DNA	1223240	300913041	63	246	246
AFP2_O3_E_R_D03_87_A_r2.fastq.gz	FASTQ	DNA	1223240	300913041	63	246	246
AFP2_O3_E_R_D03_87_B_r1.fastq.gz	FASTQ	DNA	792314	194109987	61	245	245
AFP2_O3_E_R_D03_87_B_r2.fastq.gz	FASTQ	DNA	792314	195694615	63	247	247
AFP2_O3_E_R_D04_118_A_r1.fastq.gz	FASTQ	DNA	992322	244105792	63	246	246
AFP2_O3_E_R_D04_118_A_r2.fastq.gz	FASTQ	DNA	992322	244105792	63	246	246
AFP2_O3_E_R_D04_118_B_r1.fastq.gz	FASTQ	DNA	630261	154409607	62	245	245
AFP2_O3_E_R_D04_118_B_r2.fastq.gz	FASTQ	DNA	630261	155670129	64	247	247
AFP2_O3_E_R_D05_149_A_r1.fastq.gz	FASTQ	DNA	471159	115903183	107	246	246
AFP2_O3_E_R_D05_149_A_r2.fastq.gz	FASTQ	DNA	471159	115903183	107	246	246
AFP2_O3_E_R_D05_149_B_r1.fastq.gz	FASTQ	DNA	551871	135204713	103	245	245
AFP2_O3_E_R_D05_149_B_r2.fastq.gz	FASTQ	DNA	551871	136308455	105	247	247
AFP2_O3_E_R_D06_179_A_r1.fastq.gz	FASTQ	DNA	957870	235631200	63	246	246
AFP2_O3_E_R_D06_179_A_r2.fastq.gz	FASTQ	DNA	957870	235631200	63	246	246
AFP2_O3_E_R_D06_179_B_r1.fastq.gz	FASTQ	DNA	870393	213241152	62	245	245
AFP2_O3_E_R_D06_179_B_r2.fastq.gz	FASTQ	DNA	870393	214981938	64	247	247
AFP2_O3_E_R_D07_209_A_r1.fastq.gz	FASTQ	DNA	777669	191303443	103	246	246
AFP2_O3_E_R_D07_209_A_r2.fastq.gz	FASTQ	DNA	777669	191303443	103	246	246
AFP2_O3_E_R_D07_209_B_r1.fastq.gz	FASTQ	DNA	852324	208814672	62	245	245
AFP2_O3_E_R_D07_209_B_r2.fastq.gz	FASTQ	DNA	852324	210519320	64	247	247
AFP2_O3_E_R_D08_236_A_r1.fastq.gz	FASTQ	DNA	822458	202320541	63	246	246
AFP2_O3_E_R_D08_236_A_r2.fastq.gz	FASTQ	DNA	822458	202320541	63	246	246
AFP2_O3_E_R_D08_236_B_r1.fastq.gz	FASTQ	DNA	663705	162603127	101	245	245
AFP2_O3_E_R_D08_236_B_r2.fastq.gz	FASTQ	DNA	663705	163930537	103	247	247
AFP2_O3_E_R_D09_269_A_r1.fastq.gz	FASTQ	DNA	926758	227978389	62	246	246
AFP2_O3_E_R_D09_269_A_r2.fastq.gz	FASTQ	DNA	926758	227978389	62	246	246
AFP2_O3_E_R_D09_269_B_r1.fastq.gz	FASTQ	DNA	948236	232311883	55	245	245
AFP2_O3_E_R_D09_269_B_r2.fastq.gz	FASTQ	DNA	948236	234208355	57	247	247
AFP2_O3_E_R_D10_297_A_r1.fastq.gz	FASTQ	DNA	860766	211745830	63	246	246
AFP2_O3_E_R_D10_297_A_r2.fastq.gz	FASTQ	DNA	860766	211745830	63	246	246
AFP2_O3_E_R_D10_297_B_r1.fastq.gz	FASTQ	DNA	641158	157080198	62	245	245
AFP2_O3_E_R_D10_297_B_r2.fastq.gz	FASTQ	DNA	641158	158362514	64	247	247
